# Supplementary material for: Silencing an ATP-Dependent Caseinolytic Protease Proteolytic Subunit Gene Enhances the Resistance of Rice to Nilaparvata lugens
Source: Int J Mol Sci. 2024 Mar 26;25(7):3699. doi: 10.3390/ijms25073699 (PMC11011769; doi:10.3390/ijms25073699)
Supplement: Supplementary file 1 [file ijms-25-03699-s001.zip › ijms-ClpP6-SI tables-0228.xlsx]

## Sheet: Table S1
Table S1 Primers used for real time-qPCR
Gene names	Gene ID	Forward primer (5'-…-3')	Reverse primer (3'-…-5')	R2/Effiency (%)
OsACTIN	Os03g0718100	TGGACAGGTTATCACCATTGGT	CCGCAGCTTCCATTCCTATG	0.999/99
OsClpP6	Os03g0411500	ATGGCGCCTATGGCCATCTC	GAGAGCCACGCCTGATTTGG	0.997/105
TPS38	Os07g0218200	CTATGCCTCTCCAGATGTGTTC	CTGAGATGGGCAGCATTGTA	0.999/100
PR1a	Os07g0129200	GTCGGAGAAGCAGTGGTA	CGAGTAGTTGCAGGTGATG	0.997/102
TPS3	Os02g0121700	TCGACGCTACGAGATGCTTTTA	CACCGTAGCAGCTACCTGATCTG	0.997/91
NCED1	Os02g0704000	CTCACCATGAAGTCCATGAGGCTT	GTTCTCGTAGTCTTGGTC	0.998/99
RBCS5	Os12g0274700	GGCAGGTACTGGACCATGTG	TTGTCGAAGCCGATGATACG	0.997/90
RBCS5	Os12g0291400	AGCTTTGAACGTTCGAATC	CATACACAGCTGATGTTGACAC	0.999/97

## Sheet: Table S2
Table S2 Statistical table for assessing sample sequencing data
Sample	Total_reads	Raw_bases	Q30(%)	Total_map	Exon
WT_Con_1	45465786	6.82G	94.53	43892592(96.54%)	6020695901(91.63%)
WT_Con_2	48098674	7.21G	94.51	46403415(96.48%)	6370517741(91.72%)
WT_Con_3	42769794	6.42G	94.57	41334189(96.64%)	5696844259(92.07%)
WT_BPH_1	43558742	6.53G	94.41	30154446(69.23%)	4117839809(91.25%)
WT_BPH_2	45829164	6.87G	94.54	29798210(65.02%)	4036176185(90.5%)
WT_BPH_3	46771248	7.02G	94.17	32115224(68.66%)	4370598271(90.94%)
irClpP6-4_Con_1	42876674	6.43G	94.41	41226074(96.15%)	5662500646(91.77%)
irClpP6-4_Con_2	48482400	7.27G	94.58	46541964(96.0%)	6388242221(91.71%)
irClpP6-4_Con_3	45614876	6.84G	94.58	44021315(96.51%)	6125833726(92.92%)
irClpP6-4_BPH_1	42753716	6.41G	94.45	29902511(69.94%)	4056987429(90.63%)
irClpP6-4_BPH_2	42446738	6.37G	94.28	29966120(70.6%)	4064471807(90.63%)
irClpP6-4_BPH_3	43398346	6.51G	94.32	30108076(69.38%)	4086703684(90.69%)

## Sheet: Table S3
Table S3 DEGs in irClpP6-4_BPH vs WT_BPH
gene_id	irClpP6-4_BPH_1	irClpP6-4_BPH_2	irClpP6-4_BPH_3	WT_BPH_1	WT_BPH_2	WT_BPH_3	irClpP6-4_BPH	WT_BPH	log2FoldChange	pvalue	padj	gene_name	gene_chr	gene_start	gene_end	gene_strand	gene_length	gene_biotype	gene_description	tf_family
novel.121	1112.4	956.77	896.59	18.6128	42.6279	23.312	988.585	28.1842	5.13342	1.90259e-131	4.50095e-127	-	10	2074020	2082476	+	3076	-	PF02458:Transferase family	-
Os10g0109300	77.8473	62.6884	67.2184	801.328	788.616	700.293	69.2514	763.413	-3.4622	2.93531e-100	3.47203e-96	PRX125	10	655625	658866	-	1447	-	- && Q9LEH3.1 RecName: Full=Peroxidase 15; Short=Prx15; AltName: Full=Anionic peroxidase; Flags: Precursor && PF00141:Peroxidase	-
Os04g0650700	739.549	598.109	673.218	2772.32	2346.47	2464.55	670.292	2527.78	-1.91494	7.57709e-66	5.97504e-62	OsASNase2	4	33161539	33164512	+	2889	-	- && Q8GXG1.2 RecName: Full=Probable isoaspartyl peptidase/L-asparaginase 2; AltName: Full=L-asparagine amidohydrolase 2; Contains: RecName: Full=Isoaspartyl peptidase/L-asparaginase 2 subunit alpha; Contains: RecName: Full=Isoaspartyl peptidase/L-asparaginase 2 subunit beta; Flags: Precursor && -	-
novel.615	746.719	622.774	653.569	2.93886	3.87527	4.6624	674.354	3.82551	7.45674	1.54692e-64	9.14887e-61	-	4	535039	537868	+	1233	-	PF05754:Domain of unknown function (DUF834)	DUF834
Os11g0514500	2079.34	2331.8	2349.54	499.606	637.481	648.074	2253.56	595.054	1.92072	2.56062e-60	1.21153e-56	-	11	18430464	18432555	-	993	-	- && Q94AG2.2 RecName: Full=Somatic embryogenesis receptor kinase 1; Short=AtSERK1; AltName: Full=Somatic embryogenesis receptor-like kinase 1; Flags: Precursor && PF08263:Leucine rich repeat N-terminal domain	LRRNT_2
Os12g0555000	7192.68	7992.26	8244.07	2911.43	2389.1	2505.58	7809.67	2602.04	1.58568	1.44359e-56	5.69183e-53	RSOsPR10	12	22580880	22581936	+	760	-	- && - && PF10604:Polyketide cyclase / dehydrase and lipid transport	-
Os03g0687700	641.216	474.788	352.638	48.981	25.1892	38.2317	489.547	37.4673	3.70842	2.08407e-51	7.04325e-48	OsEnS-52	3	27444695	27445609	-	915	-	- && - && PF00161:Ribosome inactivating protein	-
Os11g0592000	16048.8	15749.2	15155.2	7672.38	6718.74	7509.27	15651.1	7300.13	1.10026	3.12031e-38	9.22715e-35	OsPR4c	11	22502008	22502923	+	743	-	- && P28814.1 RecName: Full=Barwin && PF00967:Barwin family	-
novel.325	726.233	756.372	667.013	229.231	157.917	179.036	716.539	188.728	1.92535	1.20156e-37	3.15837e-34	-	12	12357454	12369316	+	11843	-	PF03732:Retrotransposon gag protein|PF04564:U-box domain	U-box
Os03g0830500	6353.77	5423.06	6189.26	2788.98	2646.81	2587.63	5988.7	2674.47	1.16304	3.31119e-36	7.83327e-33	OsFWL7	3	34883520	34884578	-	825	-	- && D9HP26.1 RecName: Full=Cell number regulator 10; AltName: Full=ZmCNR10 && PF04749:PLAC8 family	-
Os10g0135100	212.031	194.231	157.188	9.79619	12.5946	14.9197	187.817	12.4368	3.91333	8.63613e-35	1.85732e-31	-	10	2169099	2170542	+	1444	-	- && - && PF00931:NB-ARC domain	NB-ARC
Os11g0116200	2476.77	2360.58	2456.06	5618.12	5471.87	4819.06	2431.14	5303.02	-1.12512	1.16717e-34	2.30098e-31	OsLTP1.13	11	722933	726970	+	1503	-	- && Q84N29.1 RecName: Full=Probable non-specific lipid-transfer protein 3; Short=TaLTP3; Flags: Precursor && PF13639:Ring finger domain	-
Os12g0226400	21.5104	6.16608	11.3754	183.189	201.514	260.162	13.0173	214.955	-4.04507	1.38329e-34	2.51727e-31	-	12	6889996	6896735	+	1166	-	- && Q9SLN8.1 RecName: Full=2-alkenal reductase (NADP(+)-dependent); AltName: Full=Alkenal double bound reductase; AltName: Full=Allylic alcohol dehydrogenase 1; Short=allyl-ADH1; AltName: Full=Flavin-free double bond reductase; Short=NtDBR; AltName: Full=Pulegone reductase; Short=NtRed-1 && PF00107:Zinc-binding dehydrogenase|PF16884:N-terminal domain of oxidoreductase	ADH_zinc_N
Os12g0292400	498.837	609.414	607.034	1801.52	1535.57	1405.25	571.762	1580.78	-1.46705	1.2075e-31	2.04042e-28	RBCS	12	11320409	11322505	+	1994	-	- && Q0INY7.1 RecName: Full=Ribulose bisphosphate carboxylase small chain, chloroplastic; Short=Ribulose bisphosphate carboxylase small chain C; Short=RuBisCO small subunit; Short=RuBisCO small subunit C; Flags: Precursor >A2Y205.2 RecName: Full=Ribulose bisphosphate carboxylase small chain, chloroplastic; Short=Ribulose bisphosphate carboxylase small chain C; Short=RuBisCO small subunit; Short=R…	-
Os06g0210100	145.451	195.259	147.88	501.565	591.947	612.64	162.864	568.717	-1.80423	9.15434e-30	1.44376e-26	-	6	5619150	5621697	+	865	-	- && Q6IDL4.1 RecName: Full=Transmembrane emp24 domain-containing protein p24delta3; AltName: Full=p24 family protein delta1a; Short=p24delta1a; AltName: Full=p24 family protein delta3; Short=p24delta3; Flags: Precursor && PF01105:emp24/gp25L/p24 family/GOLD	-
Os06g0579100	1373.59	1441.83	1405.38	585.812	652.013	661.129	1406.94	632.985	1.15209	1.53406e-28	2.2682e-25	-	6	22556192	22558566	+	2034	-	- && - && -	-
Os03g0830400	1839.65	1884.76	1992.77	751.368	734.363	928.751	1905.73	804.827	1.24318	2.03002e-28	2.82496e-25	-	3	34878043	34878992	-	839	-	- && D9HP26.1 RecName: Full=Cell number regulator 10; AltName: Full=ZmCNR10 && PF04749:PLAC8 family	-
Os12g0491800	1343.89	905.386	1213.03	415.359	403.996	349.68	1154.1	389.678	1.56676	6.97353e-27	9.16516e-24	OsKSL10	12	18509843	18528700	-	2810	-	- && Q2QQJ5.2 RecName: Full=Ent-sandaracopimara-8(14),15-diene synthase; AltName: Full=Ent-kaurene synthase-like 10; Short=OsKSL10; AltName: Full=Ent-sandaracopimaradiene synthase; AltName: Full=Gamma-curcumene synthase && PF01397:Terpene synthase, N-terminal domain|PF03936:Terpene synthase family, metal binding domain	-
Os11g0189600	22.5347	32.8857	38.2628	290.947	207.327	180.901	31.2277	226.392	-2.85789	2.76037e-26	3.31854e-23	OsOSC7	11	4522342	4557911	+	2704	-	- && H2KWF1.1 RecName: Full=Parkeol synthase && PF13243:Squalene-hopene cyclase C-terminal domain|PF13249:Squalene-hopene cyclase N-terminal domain	-
Os04g0659100	1190.24	1228.08	1235.78	3402.22	3052.74	2403	1218.03	2952.65	-1.27733	2.80555e-26	3.31854e-23	OsGLN2	4	33624428	33631025	-	2096	-	- && P14655.1 RecName: Full=Glutamine synthetase, chloroplastic; AltName: Full=Glutamate--ammonia ligase; AltName: Full=OsGS2; Short=GS2; Flags: Precursor && PF03951:Glutamine synthetase, beta-Grasp domain|PF00120:Glutamine synthetase, catalytic domain	-
Os08g0371200	26.632	17.4706	21.7167	180.25	152.104	180.901	21.9397	171.085	-2.96299	4.03072e-26	4.5407e-23	-	8	17299388	17323234	-	636	-	- && - && -	-
Os01g0947000	568.49	521.033	603.931	148.902	217.015	163.184	564.485	176.367	1.67848	5.12363e-26	5.50953e-23	-	1	41629302	41631696	+	2157	-	- && P15737.1 RecName: Full=Glucan endo-1,3-beta-glucosidase GII; AltName: Full=(1->3)-beta-glucan endohydrolase GII; AltName: Full=(1->3)-beta-glucanase isoenzyme GII; AltName: Full=Beta-1,3-endoglucanase GII; Flags: Precursor && PF00332:Glycosyl hydrolases family 17	Glyco_hydro_17
Os01g0566500	1021.23	916.69	1243.02	2753.71	2287.38	2746.16	1060.32	2595.75	-1.29173	7.13387e-26	7.33765e-23	OsCCD8a	1	21665759	21668304	-	1787	-	- && Q93VD5.1 RecName: Full=Carotenoid cleavage dioxygenase 8 homolog A, chloroplastic; Short=OsCCD8a; AltName: Full=Protein D10-like; Flags: Precursor && PF03055:Retinal pigment epithelial membrane protein	RPE65
Os12g0274700	406.65	601.192	434.334	1309.75	1494.88	1253.25	480.725	1352.63	-1.49242	7.70488e-26	7.59476e-23	RBCS	12	10080505	10081588	-	981	-	- && Q0INY7.1 RecName: Full=Ribulose bisphosphate carboxylase small chain, chloroplastic; Short=Ribulose bisphosphate carboxylase small chain C; Short=RuBisCO small subunit; Short=RuBisCO small subunit C; Flags: Precursor >A2Y205.2 RecName: Full=Ribulose bisphosphate carboxylase small chain, chloroplastic; Short=Ribulose bisphosphate carboxylase small chain C; Short=RuBisCO small subunit; Short=R…	-
Os08g0338000	83.9931	79.1313	92.0375	340.907	334.242	280.677	85.054	318.609	-1.90506	4.88967e-25	4.44903e-22	-	8	15199790	15201818	-	1661	-	- && - && -	-
novel.640	3362.8	3667.79	4409.52	1081.5	1474.54	1650.49	3813.37	1402.18	1.44317	5.18356e-25	4.54176e-22	-	4	16358146	16375895	+	6474	-	-	-
Os01g0623000	1052.99	1144.83	1040.33	315.437	373.963	483.025	1079.38	390.809	1.46483	8.35626e-25	6.81669e-22	OsTMM	1	24855937	24857421	-	1485	-	- && Q9SSD1.1 RecName: Full=Protein TOO MANY MOUTHS; AltName: Full=Receptor-like protein 17; Short=AtRLP17; Flags: Precursor && PF13855:Leucine rich repeat	-
Os05g0111300	614.584	755.344	764.221	2886.94	1661.52	2076.64	711.383	2208.36	-1.63425	1.64157e-24	1.29449e-21	OsMT2b	5	605868	606764	+	674	-	- && A2XZL0.1 RecName: Full=Metallothionein-like protein 2C; AltName: Full=Class I metallothionein-like protein 2C; AltName: Full=OsMT-I-2c; AltName: Full=OsMT2b >A3AZ88.1 RecName: Full=Metallothionein-like protein 2C; AltName: Full=Class I metallothionein-like protein 2C; AltName: Full=OsMT-I-2c; AltName: Full=OsMT2b && -	-
Os07g0129200	7930.18	7359.21	7841.8	3577.57	2706.87	3882.85	7710.4	3389.1	1.18584	6.91457e-24	5.27671e-21	PR1A	7	1512025	1512958	+	934	-	- && P35793.1 RecName: Full=Pathogenesis-related protein PRB1-3; AltName: Full=HV-8; AltName: Full=PR-1B; Flags: Precursor && PF00188:Cysteine-rich secretory protein family	SCP
Os12g0555300	1152.34	1195.19	1457.09	474.136	426.279	577.206	1268.21	492.54	1.36397	9.15576e-24	6.76868e-21	PR10	12	22595531	22596804	+	408	-	- && - && PF00407:Pathogenesis-related protein Bet v I family	-
Os10g0492300	609.462	530.283	587.385	1464.53	1303.06	1177.72	575.71	1315.1	-1.19157	1.24124e-23	8.89815e-21	-	10	18687994	18693376	-	1668	-	- && O24303.1 RecName: Full=Protein TIC110, chloroplastic; AltName: Full=Chloroplast inner envelope protein, 110 kDa; Short=psIEP110; AltName: Full=IAP100; AltName: Full=Translocon at the inner envelope membrane of chloroplasts 110; Flags: Precursor && PF16940:Chloroplast envelope transporter	-
Os07g0147500	1157.47	1572.35	1162.36	4069.34	3379.23	2832.88	1297.39	3427.15	-1.4013	1.72147e-23	1.19779e-20	PsbR	7	2454338	2455636	+	620	-	- && Q40070.1 RecName: Full=Photosystem II 10 kDa polypeptide, chloroplastic; Flags: Precursor && PF04725:Photosystem II 10 kDa polypeptide PsbR	-
Os07g0432800	14.3403	4.11072	4.13651	849.33	453.406	435.469	7.52917	579.401	-6.26481	4.10398e-23	2.77394e-20	-	7	14368433	14371039	-	2142	-	- && P0C508.1 RecName: Full=DNA-directed RNA polymerase subunit beta''; AltName: Full=PEP; AltName: Full=Plastid-encoded RNA polymerase subunit beta''; Short=RNA polymerase subunit beta'' && -	-
Os04g0561500	16251.6	11439.1	15761.2	6438.06	5473.81	6736.24	14484	6216.04	1.22037	1.95464e-22	1.24976e-19	OsPOP9	4	28108757	28113603	+	3031	-	- && Q9QUR6.1 RecName: Full=Prolyl endopeptidase; Short=PE; AltName: Full=Post-proline cleaving enzyme && PF02897:Prolyl oligopeptidase, N-terminal beta-propeller domain|PF00326:Prolyl oligopeptidase family	-
Os04g0320700	534.688	665.936	608.068	1659.47	1172.27	1543.26	602.897	1458.33	-1.27438	1.62192e-20	1.00973e-17	-	4	14742565	14744334	-	1698	-	- && F8WKW1.1 RecName: Full=7-deoxyloganetin glucosyltransferase; AltName: Full=Genipin glucosyltransferase; AltName: Full=UDP-glucose glucosyltransferase 2; Short=GjUGT2; AltName: Full=UDP-glycosyltransferase 85A24 && PF00201:UDP-glucoronosyl and UDP-glucosyl transferase	UDPGT
Os07g0446600	132.135	132.571	123.061	765.083	413.685	380.452	129.256	519.74	-2.0071	1.49155e-19	9.04757e-17	-	7	15280459	15282788	-	2330	-	- && - && PF11779:Protein of unknown function (DUF3317)	-
Os10g0136200	3.07292	0	2.06826	128.33	134.665	126.817	1.71373	129.938	-6.24389	1.95678e-19	1.15729e-16	OsFbox525	10	2243002	2245973	-	2037	-	- && - && PF12937:F-box-like	-
Os12g0257600	5900	5428.2	6612.22	2746.85	2439.48	3360.66	5980.14	2849	1.06961	2.10802e-19	1.21633e-16	OsLAC28	12	8869547	8875025	+	2048	-	- && Q0IP28.1 RecName: Full=Laccase-25; AltName: Full=Benzenediol:oxygen oxidoreductase 25; AltName: Full=Diphenol oxidase 25; AltName: Full=Urishiol oxidase 25; Flags: Precursor && PF00394:Multicopper oxidase|PF07731:Multicopper oxidase|PF07732:Multicopper oxidase	-
Os04g0652700	923.924	1098.59	1079.63	508.422	522.192	484.89	1034.05	505.168	1.03358	6.23498e-19	3.35229e-16	-	4	33253920	33256572	+	1146	-	- && Q9C9G4.1 RecName: Full=Endonuclease 2; Short=AtENDO2; AltName: Full=Deoxyribonuclease ENDO2; AltName: Full=Single-stranded-nucleate endonuclease ENDO2; Flags: Precursor && PF02265:S1/P1 Nuclease	-
Os09g0434500	1846.82	1713.14	1626.68	4091.87	3416.05	3010.05	1728.88	3505.99	-1.01986	1.04413e-18	5.48912e-16	OsEREBP	9	15959434	15962646	+	1601	-	- && Q6K7E6.1 RecName: Full=Ethylene-responsive transcription factor 1; AltName: Full=Ethylene-responsive element-binding factor 1; Short=EREBP-1; Short=OsEREBP1 && PF00847:AP2 domain	AP2
Os02g0218700	2507.5	2773.71	2862.47	1432.2	1137.39	1489.17	2714.56	1352.92	1.00451	1.16561e-18	5.99454e-16	HPL2	2	6628383	6630103	+	1721	-	- && Q6Z6L1.1 RecName: Full=Allene oxide synthase 3; AltName: Full=Cytochrome P450 74A3; AltName: Full=Hydroperoxide dehydrase 3 && PF00067:Cytochrome P450	p450
Os09g0441100	356.459	432.653	433.3	127.35	155.979	163.184	407.47	148.838	1.45214	1.39788e-18	7.03608e-16	-	9	16361323	16363289	-	1866	-	- && Q9SD85.1 RecName: Full=Flavonoid 3'-monooxygenase; AltName: Full=Cytochrome P450 75B1; AltName: Full=Flavonoid 3'-hydroxylase; Short=AtF3'H; AltName: Full=Protein TRANSPARENT TESTA 7 && PF00067:Cytochrome P450	p450
Os11g0171300	7471.29	7277	6964.86	19379.8	12884.3	14062.7	7237.71	15442.3	-1.09326	3.4698e-18	1.71011e-15	Aldo	11	3488768	3491609	-	1492	-	- && Q40677.2 RecName: Full=Fructose-bisphosphate aldolase, chloroplastic; AltName: Full=Chloroplastic aldolase; Short=AldP; Flags: Precursor && PF00274:Fructose-bisphosphate aldolase class-I	-
Os09g0444900	812.275	820.088	1004.14	351.683	402.059	432.671	878.834	395.471	1.15154	4.28326e-18	2.06794e-15	-	9	16573502	16574893	-	1392	-	- && - && PF04819:Family of unknown function (DUF716)	-
Os11g0170900	1656.3	1244.52	1497.42	3887.13	3333.7	2662.23	1466.08	3294.35	-1.16792	7.22616e-18	3.35194e-15	OsBURP17	11	3463917	3467995	-	2086	-	- && B9G9L9.1 RecName: Full=BURP domain-containing protein 17; Short=OsBURP17; Flags: Precursor && -	-
Os11g0120300	467.084	543.642	479.836	160.658	211.202	218.201	496.854	196.687	1.33615	9.20156e-18	4.18618e-15	-	11	896134	897260	-	1127	-	- && Q9ZVI6.1 RecName: Full=Protein LURP-one-related 8 && PF04525:LURP-one-related	-
Os01g0866400	192.57	196.287	180.973	702.387	444.687	472.768	189.943	539.947	-1.50688	2.12793e-17	9.49821e-15	FR	1	37519585	37522414	+	1375	-	- && A2WXB2.2 RecName: Full=Fructose-1,6-bisphosphatase, cytosolic; Short=FBPase; AltName: Full=D-fructose-1,6-bisphosphate 1-phosphohydrolase >Q0JHF8.2 RecName: Full=Fructose-1,6-bisphosphatase, cytosolic; Short=FBPase; AltName: Full=D-fructose-1,6-bisphosphate 1-phosphohydrolase && PF00316:Fructose-1-6-bisphosphatase	-
Os06g0566201	596.146	419.293	480.87	174.372	154.042	216.336	498.77	181.583	1.45694	4.26468e-17	1.86833e-14	-	6	21824420	21826727	-	1600	-	- && Q5Z653.2 RecName: Full=Zinc transporter 10; AltName: Full=ZRT/IRT-like protein 10; Short=OsZIP10; Flags: Precursor && PF02535:ZIP Zinc transporter	-
Os04g0288100	409.722	364.826	336.092	151.841	149.198	150.129	370.213	150.389	1.29976	3.09175e-16	1.24113e-13	-	4	12504047	12505046	-	747	-	- && Q6ZBZ2.1 RecName: Full=Germin-like protein 8-14; AltName: Full=Germin-like protein 1; AltName: Full=Germin-like protein 5; Short=OsGER5; Flags: Precursor && PF00190:Cupin	-
Os01g0692400	95.2605	78.1036	103.413	14.6943	5.8129	1.86496	92.259	7.45738	3.64112	3.09534e-16	1.24113e-13	-	1	28575815	28576674	-	860	-	- && - && -	-
Os01g0127600	594.098	696.767	839.712	1759.4	2005.45	1301.74	710.192	1688.86	-1.24969	3.80474e-16	1.50015e-13	-	1	1515837	1516714	+	878	-	- && A2WK50.2 RecName: Full=Bowman-Birk type bran trypsin inhibitor; AltName: Full=OSE727A; AltName: Full=Protein RBBI3-3; AltName: Full=RBTI; Flags: Precursor && PF00228:Bowman-Birk serine protease inhibitor family	-
Os03g0235000	1739.27	1897.1	1234.75	661.243	628.762	814.056	1623.71	701.354	1.21084	5.00938e-16	1.86674e-13	poxN	3	7128273	7129609	-	943	-	- && Q9FG34.1 RecName: Full=Peroxidase 54; Short=Atperox P54; AltName: Full=ATP29a; Flags: Precursor && PF00141:Peroxidase	-
Os06g0608700	1023.28	944.437	1135.47	2747.83	1813.62	2138.18	1034.4	2233.21	-1.11029	5.05014e-16	1.86674e-13	OsAld-Y	6	24227136	24229290	+	1642	-	- && O65581.1 RecName: Full=Fructose-bisphosphate aldolase 5, cytosolic; Short=AtFBA5 && PF00274:Fructose-bisphosphate aldolase class-I	-
Os06g0242700	6449.03	6993.36	6998.98	2547.99	3844.26	3651.6	6813.79	3347.95	1.02511	9.63375e-16	3.45312e-13	-	6	7406037	7408609	-	2036	-	- && D9J101.1 RecName: Full=Benzoate O-methyltransferase; AltName: Full=O-methyltransferase 8 && -	-
Os12g0291400	188.472	213.757	147.88	445.727	414.653	494.215	183.37	451.532	-1.30012	1.75051e-15	6.08997e-13	RbcS5	12	11277247	11278306	+	943	-	- && P18566.2 RecName: Full=Ribulose bisphosphate carboxylase small chain A, chloroplastic; Short=RuBisCO small subunit A; Flags: Precursor && PF00101:Ribulose bisphosphate carboxylase, small chain|PF12338:Ribulose-1,5-bisphosphate carboxylase small subunit	-
Os02g0570400	1030.45	596.054	702.173	195.924	314.865	292.799	776.226	267.863	1.53463	3.38065e-15	1.12642e-12	OsKS7	2	21765011	21773418	+	3061	-	- && Q0E088.1 RecName: Full=Ent-cassa-12,15-diene synthase; AltName: Full=Diterpene cyclase 1; Short=OsDTC1; AltName: Full=Ent-kaurene synthase-like 7; Short=OsKSL7; AltName: Full=OsKS3 && PF03936:Terpene synthase family, metal binding domain|PF01397:Terpene synthase, N-terminal domain	-
Os09g0433800	169.01	137.709	145.812	784.675	464.063	339.423	150.844	529.387	-1.81075	3.72654e-15	1.22443e-12	-	9	15927027	15928052	+	915	-	- && Q8LGS1.2 RecName: Full=Protein MARD1; AltName: Full=Mediator of ABA-regulated dormancy1; AltName: Full=Senescence-associated protein SAG102 && PF04570:zinc-finger of the FCS-type, C2-C2	-
Os07g0212200	133.16	150.041	124.095	484.911	284.832	381.385	135.765	383.709	-1.49869	2.54877e-14	7.8307e-12	-	7	6134016	6136740	+	1521	-	- && Q9LYA9.1 RecName: Full=Chloroplast stem-loop binding protein of 41 kDa a, chloroplastic; Short=CSP41-a; Flags: Precursor && PF01370:NAD dependent epimerase/dehydratase family	Epimerase
Os09g0343200	130.087	126.405	146.846	382.051	279.988	357.14	134.446	339.727	-1.33749	4.52776e-14	1.33892e-11	-	9	10605026	10621833	-	2526	-	- && - && PF13857:Ankyrin repeats (many copies)|PF13962:Domain of unknown function|PF12796:Ankyrin repeats (3 copies)	-
Os07g0429700	33.8021	6.16608	5.17064	3245.48	1483.26	1084.48	15.0463	1937.74	-7.0084	5.03984e-14	1.47195e-11	-	7	14118026	14118911	+	644	-	- && - && -	-
Os02g0704000	239.688	220.951	211.996	584.833	421.435	498.877	224.212	501.715	-1.16182	8.67272e-14	2.44251e-11	OsNCED1	2	29026099	29028176	-	2078	-	- && O49675.1 RecName: Full=Probable carotenoid cleavage dioxygenase 4, chloroplastic; Short=AtCCD4; AltName: Full=AtNCED4; Flags: Precursor && PF03055:Retinal pigment epithelial membrane protein	RPE65
Os12g0434400	806.129	789.258	720.788	261.558	382.682	407.494	772.058	350.578	1.13832	8.92684e-14	2.4845e-11	-	12	14109246	14114260	+	1626	-	- && Q2QSB9.2 RecName: Full=Putative leucine aminopeptidase 1; AltName: Full=Leucyl aminopeptidase 1; Short=LAP 1; AltName: Full=Proline aminopeptidase 1; AltName: Full=Prolyl aminopeptidase 1 && PF00883:Cytosol aminopeptidase family, catalytic domain|PF02789:Cytosol aminopeptidase family, N-terminal domain	-
Os04g0281900	173.108	274.39	236.815	672.019	502.816	511.932	228.105	562.255	-1.3014	1.00429e-13	2.73087e-11	-	4	12026975	12029441	+	1010	-	- && Q0JEF7.1 RecName: Full=CASP-like protein 2A1; Short=OsCASPL2A1 >B8ARW3.1 RecName: Full=CASP-like protein 2A1; Short=OsCASPL2A1 && PF04535:Domain of unknown function (DUF588)	-
Os01g0105400	41.9965	23.6366	26.8873	90.125	210.233	200.483	30.8402	166.947	-2.43671	1.29543e-13	3.4825e-11	-	1	288372	292296	+	1950	-	- && Q9AWM8.1 RecName: Full=Kinesin-like protein KIN-7A; AltName: Full=NPK1-activating kinesin-like protein; Short=OsNACK; AltName: Full=Protein DWARF BAMBOO SHOOT 1 && -	-
novel.48	141.354	103.796	83.7644	14.6943	24.2204	20.5146	109.638	19.8098	2.46766	1.32938e-13	3.49436e-11	-	1	37128256	37130168	+	1740	-	PF13976:GAG-pre-integrase domain|PF14223:gag-polypeptide of LTR copia-type	-
novel.122	148.524	114.072	166.495	42.1236	33.9086	33.5693	143.031	36.5338	1.96994	1.51361e-13	3.9349e-11	-	10	2128736	2131730	+	2199	-	-	-
Os10g0567900	72.7257	144.903	110.652	18.6128	10.657	22.3795	109.427	17.2164	2.66563	1.67535e-13	4.26169e-11	-	10	22516057	22517963	+	1813	-	- && Q9FJJ4.1 RecName: Full=F-box protein At5g62510 && -	-
Os05g0472700	498.837	421.349	535.679	227.272	196.67	244.31	485.288	222.75	1.12298	1.71297e-13	4.27818e-11	OsZIP5	5	23216442	23218934	+	1431	-	- && Q6L8G0.1 RecName: Full=Zinc transporter 5; AltName: Full=ZRT/IRT-like protein 5; Short=OsZIP5; Flags: Precursor && PF02535:ZIP Zinc transporter	-
Os07g0432201	41.9965	8.22144	8.27303	4160.44	1668.3	1060.23	19.497	2296.33	-6.87963	1.72973e-13	4.27818e-11	-	7	14292161	14292961	+	570	-	- && - && -	-
Os01g0955100	158.767	157.235	131.334	323.274	337.148	372.06	149.112	344.161	-1.20683	1.73608e-13	4.27818e-11	OsCML31	1	42074192	42074866	-	675	-	- && Q8RYK0.1 RecName: Full=Probable calcium-binding protein CML31; AltName: Full=Calmodulin-like protein 31 && PF13833:EF-hand domain pair	-
Os07g0413800	412.795	585.777	521.201	1153.01	891.311	1099.4	506.591	1047.91	-1.04869	2.23391e-13	5.28475e-11	-	7	13037553	13038640	-	1088	-	- && Q9XIP8.1 RecName: Full=Protein CDI; AltName: Full=Protein CADMIUM INDUCED && -	-
Os04g0459500	2953.07	2742.88	2756.99	7783.07	4516.62	5445.69	2817.65	5915.13	-1.06988	2.32166e-13	5.43796e-11	-	4	22937162	22939010	+	1566	-	- && P09315.1 RecName: Full=Glyceraldehyde-3-phosphate dehydrogenase A, chloroplastic; AltName: Full=NADP-dependent glyceraldehydephosphate dehydrogenase subunit A; Flags: Precursor && PF00044:Glyceraldehyde 3-phosphate dehydrogenase, NAD binding domain|PF02800:Glyceraldehyde 3-phosphate dehydrogenase, C-terminal domain	-
Os04g0171800	172.083	168.539	153.051	444.747	613.261	318.908	164.558	458.972	-1.47934	2.6597e-13	6.16868e-11	-	4	4874385	4878321	+	3311	-	- && Q43135.3 RecName: Full=Tyrosine N-monooxygenase; AltName: Full=Cytochrome P450 79A1; AltName: Full=Cytochrome P450Tyr && -	-
Os08g0184800	2.04861	0	0	84.2472	181.169	187.429	0.682871	150.948	-7.78292	2.77569e-13	6.3752e-11	-	8	4971046	4973826	-	2294	-	- && Q8S1D9.1 RecName: Full=Phospholipase A1 EG1, chloroplastic/mitochondrial; AltName: Full=Protein EXTRA GLUME 1; Flags: Precursor >A2WY00.1 RecName: Full=Phospholipase A1 EG1, chloroplastic/mitochondrial; AltName: Full=Protein EXTRA GLUME 1; Flags: Precursor && -	-
Os01g0912700	73.75	71.9376	105.481	367.357	242.204	210.741	83.7229	273.434	-1.70717	4.14836e-13	9.25829e-11	-	1	39777762	39779892	+	1048	-	- && - && PF10184:Uncharacterized conserved protein (DUF2358)	-
Os12g0261300	127.014	168.539	165.461	390.868	319.709	372.992	153.671	361.19	-1.23308	4.58365e-13	1.00403e-10	-	12	9179690	9182665	+	2833	-	- && - && -	-
Os05g0179100	229.445	153.124	159.256	51.9198	57.1602	54.0839	180.608	54.388	1.73158	5.52896e-13	1.15859e-10	-	5	4722809	4723431	+	623	-	- && - && PF08137:DVL family	-
novel.1170	170.035	196.287	105.481	34.2867	42.6279	40.0967	157.268	39.0038	2.01125	5.53412e-13	1.15859e-10	-	9	14650683	14657371	-	6435	-	PF01536:Adenosylmethionine decarboxylase	SAM_decarbox
Os04g0432300	420.99	403.878	488.109	215.516	171.48	219.133	437.659	202.043	1.11478	1.03535e-12	2.0411e-10	-	4	21447893	21449455	+	1374	-	- && Q9C8W3.2 RecName: Full=Alpha-(1,4)-fucosyltransferase; AltName: Full=FT4-M; AltName: Full=FucTC; AltName: Full=Fucosyltransferase 13; Short=AtFUT13; AltName: Full=Galactoside 3(4)-L-fucosyltransferase && PF00852:Glycosyltransferase family 10 (fucosyltransferase) C-term	-
Os07g0529600	129.063	131.543	98.2422	303.682	276.113	288.137	119.616	289.31	-1.27393	1.08299e-12	2.11739e-10	OsDR8	7	20724581	20726069	+	1489	-	- && C5X2M4.1 RecName: Full=Thiamine thiazole synthase 2, chloroplastic; AltName: Full=Thiazole biosynthetic enzyme 2; Flags: Precursor && PF01946:Thi4 family	-
Os12g0231000	519.323	536.449	514.996	1513.51	873.872	1066.76	523.589	1151.38	-1.13671	1.57435e-12	2.97956e-10	OsPTR3	12	7165808	7171019	+	2280	-	- && Q93VV5.1 RecName: Full=Protein NRT1/ PTR FAMILY 4.3; Short=AtNPF4.3; AltName: Full=Nitrate transporter 1.14 && PF00854:POT family	-
Os01g0253800	470.156	721.431	567.737	174.372	204.42	301.191	586.441	226.661	1.37035	1.60059e-12	3.00517e-10	-	1	8401548	8402325	-	528	-	- && - && -	-
Os10g0136100	1.02431	0	0	101.88	138.541	132.412	0.341435	124.278	-8.39779	3.63798e-12	6.43616e-10	-	10	2226411	2231401	-	3577	-	- && Q39214.1 RecName: Full=Disease resistance protein RPM1; AltName: Full=Resistance to Pseudomonas syringae protein 3 && PF00931:NB-ARC domain	NB-ARC
Os10g0178500	169.01	153.124	139.607	403.603	289.676	552.029	153.914	415.103	-1.43176	3.71467e-12	6.50948e-10	OsUGT98B3	10	5412580	5414295	+	1716	-	- && Q9ZQ94.1 RecName: Full=UDP-glycosyltransferase 73C5; AltName: Full=Cytokinin-O-glucosyltransferase 3; AltName: Full=Deoxynivalenol-glucosyl-transferase 1; AltName: Full=Zeatin O-glucosyltransferase 3; Short=AtZOG3 && PF00201:UDP-glucoronosyl and UDP-glucosyl transferase	UDPGT
Os11g0216100	284.757	400.795	348.501	882.637	639.419	679.779	344.684	733.945	-1.09026	3.96267e-12	6.88045e-10	-	11	6065311	6066797	-	1046	-	- && Q9SMS0.1 RecName: Full=NAD(P)H-quinone oxidoreductase subunit T, chloroplastic; AltName: Full=DNA J PROTEIN C75; AltName: Full=NAD(P)H dehydrogenase subunit T; Short=NDH subunit T; AltName: Full=NADH-plastoquinone oxidoreductase subunit T; AltName: Full=Protein CHLORORESPIRATORY REDUCTION J; Flags: Precursor && PF00226:DnaJ domain	DnaJ
Os10g0144700	4.09722	0	2.06826	50.9402	62.9731	56.8813	2.05516	56.9315	-4.79067	6.08659e-12	1.0359e-09	-	10	2709163	2711992	-	1626	-	- && O64637.1 RecName: Full=Cytochrome P450 76C2; AltName: Full=Protein YELLOW-LEAF-SPECIFIC GENE 6 && PF00067:Cytochrome P450	p450
Os08g0114100	261.198	240.477	289.556	622.058	543.506	457.848	263.744	541.137	-1.03651	7.94419e-12	1.33288e-09	-	8	751421	753191	+	1202	-	- && C7AU21.1 RecName: Full=Beta-carotene isomerase D27, chloroplastic; AltName: Full=Protein DWARF-27; Flags: Precursor && PF13225:Domain of unknown function (DUF4033)	-
Os12g0528801	111.649	120.238	142.71	41.144	9.68816	13.0547	124.866	21.2956	2.55628	8.26448e-12	1.36722e-09	-	12	20844119	20846664	-	311	-	- && - && -	-
Os10g0563900	697.552	859.14	661.842	304.662	385.589	415.887	739.512	368.712	1.00358	1.15546e-11	1.84695e-09	CycU4	10	22268600	22270503	+	845	-	- && Q7XC35.1 RecName: Full=Cyclin-P4-1; Short=CycP4;1 && PF08613:Cyclin	-
Os07g0182400	77.8473	65.7715	73.4231	306.621	191.826	173.441	72.3473	223.963	-1.62951	1.27657e-11	1.97384e-09	OsIAA24	7	4355211	4356572	-	1163	-	- && Q6ZL57.1 RecName: Full=Auxin-responsive protein IAA24; AltName: Full=Indoleacetic acid-induced protein 24 && PF02309:AUX/IAA family	-
Os03g0426350	1.02431	1.02768	0	67.5937	121.102	114.695	0.683995	101.13	-7.2049	1.53298e-11	2.33972e-09	-	3	17809791	17810736	+	946	-	- && - && -	-
Os12g0629700	380.018	375.103	387.798	191.026	121.102	191.159	380.973	167.762	1.18284	2.95172e-11	4.34335e-09	-	12	26946904	26947698	-	795	-	- && P31110.1 RecName: Full=Thaumatin-like protein; Flags: Precursor && PF00314:Thaumatin family	Thaumatin
Os07g0217600	525.469	462.456	665.979	182.209	230.578	300.259	551.301	237.682	1.21277	2.95591e-11	4.34335e-09	CYP71Z2	7	6494465	6501972	+	1811	-	- && Q6YV88.1 RecName: Full=Ent-cassadiene C2-hydroxylase; AltName: Full=Cytochrome P450 71Z7 && PF00067:Cytochrome P450	p450
Os10g0533500	1149.27	565.224	824.201	323.274	394.308	338.491	846.232	352.024	1.26543	3.21503e-11	4.66614e-09	OsBCH3	10	20744421	20746446	+	1172	-	- && Q9SZZ8.1 RecName: Full=Beta-carotene 3-hydroxylase 1, chloroplastic; Short=AtB1; Flags: Precursor && PF04116:Fatty acid hydroxylase superfamily	-
novel.745	444.549	560.085	430.198	216.496	254.799	240.58	478.277	237.292	1.01105	3.89921e-11	5.62461e-09	-	5	13554121	13557483	+	3363	-	-	-
Os07g0673200	537.761	544.67	619.443	231.19	336.179	282.542	567.291	283.304	1.00152	4.08595e-11	5.85826e-09	OsNLA1	7	28452751	28456565	-	1693	-	- && Q7XI73.1 RecName: Full=Probable E3 ubiquitin-protein ligase BAH1-like 2; AltName: Full=RING-type E3 ubiquitin transferase BAH1-like 2 && PF13920:Zinc finger, C3HC4 type (RING finger)	-
Os08g0378000	41.9965	45.2179	26.8873	119.514	132.728	139.872	38.0339	130.705	-1.7808	4.29667e-11	6.08661e-09	-	8	17766039	17770910	+	4872	-	- && - && -	-
Os02g0112900	190.521	206.564	264.737	87.1861	48.4408	88.5857	220.607	74.7375	1.56075	5.18902e-11	7.30694e-09	OsGABA-T	2	679468	697321	-	1601	-	- && Q6ZH29.1 RecName: Full=Probable gamma-aminobutyrate transaminase 4; Short=OsGABA-T && PF00202:Aminotransferase class-III	Aminotran_3
Os03g0609500	215.104	193.204	220.269	641.651	417.56	391.642	209.526	483.617	-1.20631	5.737e-11	7.98354e-09	OsLBD38	3	22976955	22979863	-	1104	-	- && Q9FN11.1 RecName: Full=LOB domain-containing protein 37; AltName: Full=ASYMMETRIC LEAVES 2-like protein 39; Short=AS2-like protein 39 && PF03195:Protein of unknown function DUF260	-
Os12g0617250	301.146	388.463	386.764	146.943	164.699	188.361	358.791	166.668	1.10532	9.19959e-11	1.25077e-08	-	12	26268681	26270167	-	1346	-	- && O24592.2 RecName: Full=9-cis-epoxycarotenoid dioxygenase 1, chloroplastic; AltName: Full=Protein VIVIPAROUS14; Short=VP-14; Short=VP14; Flags: Precursor && PF03055:Retinal pigment epithelial membrane protein	RPE65
Os03g0860100	145.451	149.014	139.607	43.1032	45.5344	58.7463	144.691	49.128	1.55666	1.08004e-10	1.45173e-08	OsERF#083	3	36301491	36302407	-	917	-	- && Q8LDC8.2 RecName: Full=Ethylene-responsive transcription factor 1B; Short=AtERF1B; AltName: Full=Ethylene-responsive element-binding factor 1B; Short=EREBP-1B && PF00847:AP2 domain	AP2
Os11g0485500	163.889	166.484	183.041	428.094	303.24	365.533	171.138	365.622	-1.09514	1.24071e-10	1.65827e-08	-	11	17116033	17116704	-	672	-	- && - && -	-
Os07g0469100	436.354	520.006	347.467	1053.09	714.018	902.642	434.609	889.917	-1.03383	1.68754e-10	2.20564e-08	-	7	16743570	16745394	+	760	-	- && Q8LCA1.2 RecName: Full=Protein CURVATURE THYLAKOID 1B, chloroplastic; AltName: Full=Photosystem I protein P; AltName: Full=Thylakoid membrane phosphoprotein 14 kDa; Flags: Precursor && PF14159:CAAD domains of cyanobacterial aminoacyl-tRNA synthetase	-
Os02g0194700	103.455	112.017	145.812	328.172	295.489	234.985	120.428	286.216	-1.24863	1.94166e-10	2.52384e-08	OsLOX1	2	5276686	5282626	-	3158	-	- && Q8GSM2.1 RecName: Full=Lipoxygenase 2.3, chloroplastic; AltName: Full=LOX2:Hv:3; Flags: Precursor && PF01477:PLAT/LH2 domain|PF00305:Lipoxygenase	Lipoxygenase
novel.1117	16.3889	9.24912	23.785	69.553	89.1311	93.2481	16.4743	83.9774	-2.35092	1.96318e-10	2.53787e-08	-	9	4049754	4052581	+	1577	-	-	-
Os04g0280500	1607.14	1014.32	1537.75	336.989	198.607	383.25	1386.4	306.282	2.17826	2.03446e-10	2.61572e-08	-	4	11894682	11896959	+	456	-	- && Q949S5.1 RecName: Full=F-box protein PP2-B11; AltName: Full=Protein PHLOEM PROTEIN 2-LIKE B11; Short=AtPP2-B11; AltName: Full=SKP1-interacting partner 12 && -	-
Os10g0138100	44.0452	50.3563	49.6382	6.85733	0	1.86496	48.0132	2.90743	4.05584	2.12976e-10	2.72344e-08	AO	10	2358853	2368717	+	5068	-	- && Q7XH05.1 RecName: Full=Probable aldehyde oxidase 1; Short=AO-1 && PF00941:FAD binding domain in molybdopterin dehydrogenase|PF03450:CO dehydrogenase flavoprotein C-terminal domain|PF02738:Molybdopterin-binding domain of aldehyde dehydrogenase|PF01315:Aldehyde oxidase and xanthine dehydrogenase, a/b hammerhead domain|PF01799:[2Fe-2S] binding domain	-
Os12g0626500	688.334	571.39	755.948	323.274	247.048	399.102	671.891	323.141	1.05542	2.27549e-10	2.89416e-08	LEA	12	26793127	26793851	+	725	-	- && - && PF04927:Seed maturation protein	-
Os02g0134200	114.722	150.041	101.345	237.068	304.208	338.491	122.036	293.256	-1.26522	2.30352e-10	2.91413e-08	OsSGL	2	1799750	1800811	-	1062	-	- && - && PF07816:Protein of unknown function (DUF1645)	-
Os10g0136400	8.19445	5.1384	8.27303	80.3288	66.8483	36.3668	7.20196	61.1813	-3.08547	3.28572e-10	3.9624e-08	-	10	2249407	2252236	-	1985	-	- && Q8W4G6.2 RecName: Full=Cysteine-rich receptor-like protein kinase 15; Short=Cysteine-rich RLK15; Flags: Precursor && PF01657:Salt stress response/antifungal|PF07714:Protein tyrosine kinase	Pkinase_Tyr
Os07g0450100	1.02431	0	0	148.902	63.9419	43.8266	0.341435	85.5569	-7.85778	3.29334e-10	3.9624e-08	-	7	15458182	15460126	-	1841	-	- && - && -	-
Os10g0137700	39.9479	53.4393	48.604	2.93886	0	0.932481	47.3304	1.29045	5.20716	3.37054e-10	4.02711e-08	-	10	2337370	2340164	-	1510	-	- && - && PF12937:F-box-like	-
Os07g0412100	537.761	442.93	556.361	1183.38	1214.9	742.255	512.351	1046.84	-1.03057	4.02976e-10	4.74288e-08	GBSSII	7	12916883	12924202	-	2288	-	- && Q8LL05.1 RecName: Full=Granule-bound starch synthase 1b, chloroplastic/amyloplastic; AltName: Full=Granule-bound starch synthase Ib; Flags: Precursor && PF00534:Glycosyl transferases group 1|PF08323:Starch synthase catalytic domain	Glycos_transf_1
novel.1077	0	0	0	21.5516	79.4429	42.8941	0	47.9629	-7.98582	4.34038e-10	5.08319e-08	-	8	5773614	5776569	-	2426	-	-	-
Os05g0594500	65.5556	62.6884	68.2525	253.721	140.478	176.239	65.4988	190.146	-1.5372	4.45351e-10	5.18998e-08	-	5	29595609	29601356	-	3901	-	- && - && -	-
Os02g0720900	148.524	227.117	244.054	444.747	456.312	413.089	206.565	438.05	-1.08459	4.55715e-10	5.28473e-08	-	2	29911311	29916314	+	4541	-	- && Q8S9J6.1 RecName: Full=Aspartyl protease family protein At5g10770; Flags: Precursor && PF14543:Xylanase inhibitor N-terminal|PF14541:Xylanase inhibitor C-terminal	-
Os01g0339500	32.7778	41.1072	16.5461	124.412	98.8193	122.155	30.1437	115.129	-1.9328	5.43783e-10	6.21463e-08	ONAC030	1	13342969	13345864	-	1976	-	- && - && -	-
novel.944	1.02431	0	0	142.045	45.5344	54.0839	0.341435	80.5543	-7.77107	5.48516e-10	6.23858e-08	-	7	15452086	15455078	+	2907	-	-	-
Os01g0109000	39.9479	33.9134	33.0921	81.3084	142.416	182.766	35.6512	135.497	-1.92712	5.53313e-10	6.26303e-08	-	1	495711	497253	-	1458	-	- && - && -	-
Os12g0105800	324.705	311.387	303	142.045	175.356	148.264	313.031	155.222	1.01211	6.16919e-10	6.94974e-08	-	12	306553	310206	-	2479	-	- && Q9LYN6.1 RecName: Full=Probable inactive receptor-like protein kinase At3g56050; Flags: Precursor && PF07714:Protein tyrosine kinase	Pkinase_Tyr
Os07g0446900	0	0	0	54.8587	44.5656	27.9744	0	42.4662	-7.80901	6.39592e-10	7.13718e-08	-	7	15295358	15296221	-	228	-	- && - && -	-
novel.278	7.17014	1.02768	0	28.409	70.7236	58.7463	2.73261	52.6263	-4.26394	6.45456e-10	7.1688e-08	-	11	9568406	9574219	-	1228	-	-	-
Os07g0416700	2.04861	0	0	253.721	92.0375	93.2481	0.682871	146.336	-7.73836	7.48049e-10	8.15511e-08	OsFAD2-4	7	13180808	13182551	-	1135	-	- && A3F5L3.1 RecName: Full=Fatty acid desaturase DES2; Short=SbDES2 && -	-
Os05g0472400	2544.38	2008.09	2481.91	384.011	153.073	458.781	2344.79	331.955	2.82028	7.91816e-10	8.59266e-08	OsZIP9	5	23201237	23212773	+	1205	-	- && Q0DHE3.3 RecName: Full=Zinc transporter 9; AltName: Full=ZRT/IRT-like protein 9; Short=OsZIP9; Flags: Precursor && -	-
Os01g0928700	241.736	277.473	255.43	118.534	130.79	118.425	258.213	122.583	1.07493	8.1524e-10	8.76642e-08	OsLCB2a2	1	40767170	40771614	-	1494	-	- && Q8RYL0.1 RecName: Full=Long chain base biosynthesis protein 2c && PF00155:Aminotransferase class I and II	Aminotran_1_2
Os03g0431200	365.677	317.553	337.126	798.39	843.839	493.282	340.119	711.837	-1.06509	8.62975e-10	9.19613e-08	-	3	18087593	18095041	-	1524	-	- && Q84JF4.1 RecName: Full=Probable amino-acid acetyltransferase NAGS1, chloroplastic; AltName: Full=N-acetylglutamate synthase 1; Flags: Precursor && PF00696:Amino acid kinase family|PF13508:Acetyltransferase (GNAT) domain	AA_kinase
Os12g0431300	39.9479	44.1902	42.3993	4.8981	1.93763	1.86496	42.1791	2.90023	3.86997	1.03249e-09	1.08078e-07	-	12	13885480	13888224	-	2745	-	- && - && -	-
Os11g0297800	184.375	221.979	220.269	99.9212	92.0375	77.3959	208.874	89.7849	1.21907	1.35446e-09	1.38114e-07	-	11	10972674	10978662	+	2714	-	- && Q9SGZ5.2 RecName: Full=Probable beta-D-xylosidase 7; Short=AtBXL7; Flags: Precursor && PF14310:Fibronectin type III-like domain|PF00933:Glycosyl hydrolase family 3 N terminal domain|PF01915:Glycosyl hydrolase family 3 C-terminal domain	Glyco_hydro_3_C
Os05g0217800	17.4132	18.4982	11.3754	137.147	103.663	41.0292	15.7623	93.9464	-2.57368	1.43323e-09	1.45519e-07	OsBURP02	5	7255510	7257163	+	1391	-	- && Q6I5W0.1 RecName: Full=BURP domain-containing protein 2; Short=OsBURP02; Flags: Precursor && PF03181:BURP domain	-
Os02g0281200	312.413	279.529	244.054	100.901	138.541	139.872	278.666	126.438	1.13936	1.46356e-09	1.47963e-07	-	2	10444568	10450918	+	4146	-	- && Q7XA42.2 RecName: Full=Putative disease resistance protein RGA1; AltName: Full=RGA3-blb && PF00931:NB-ARC domain	NB-ARC
Os08g0290900	4.09722	0	0	62.6956	57.1602	27.0419	1.36574	48.9659	-5.15765	1.59972e-09	1.59011e-07	-	8	11629289	11631476	+	1582	-	- && - && -	-
Os01g0203400	430.209	523.089	486.04	142.045	261.58	247.107	479.779	216.911	1.14453	1.68912e-09	1.66498e-07	OsCEP7	1	5685594	5686401	+	808	-	- && - && -	-
Os07g0450000	57.3611	65.7715	51.7064	269.395	157.917	126.817	58.2797	184.71	-1.66323	1.75916e-09	1.71969e-07	-	7	15448861	15451411	+	723	-	- && Q96499.3 RecName: Full=60S ribosomal protein L44 && PF00935:Ribosomal protein L44	-
Os07g0642100	156.719	223.006	159.256	323.274	450.5	375.79	179.66	383.188	-1.0928	2.09029e-09	2.01016e-07	-	7	26719124	26727238	-	2587	-	- && - && -	-
Os08g0246700	288.854	208.619	274.044	127.35	93.0064	118.425	257.172	112.927	1.18728	2.23418e-09	2.13121e-07	-	8	8966304	8966798	+	495	-	- && - && -	-
Os09g0554200	307.292	301.11	399.174	131.269	161.792	182.766	335.859	158.609	1.08139	2.3817e-09	2.23587e-07	-	9	21956407	21957337	-	931	-	- && Q8LC69.2 RecName: Full=RING-H2 finger protein ATL8; AltName: Full=RING-type E3 ubiquitin transferase ATL8 && PF13639:Ring finger domain	-
Os05g0397300	53.2639	49.3286	31.0239	131.269	117.227	157.589	44.5388	135.362	-1.60372	2.40633e-09	2.25006e-07	-	5	19327470	19331484	-	3086	-	- && - && -	-
Os07g0434100	0	0	0	159.678	46.5032	51.2865	0	85.8225	-8.82491	2.55766e-09	2.38214e-07	-	7	14485762	14489280	+	3519	-	- && - && -	-
Os11g0634350	64.5313	124.349	37.2286	6.85733	2.90645	16.7847	75.3697	8.84948	3.08259	3.14621e-09	2.90742e-07	-	11	24958875	24960194	-	1320	-	- && - && -	-
Os02g0584800	76.823	86.3251	67.2184	169.474	192.794	181.834	76.7888	181.367	-1.23988	3.64772e-09	3.29366e-07	-	2	22553380	22554242	-	716	-	- && - && PF00403:Heavy-metal-associated domain	HMA
Os01g0262401	36.875	50.3563	37.2286	5.87772	0.968816	2.79744	41.4866	3.21466	3.69476	4.03821e-09	3.56462e-07	-	1	8856489	8857022	-	534	-	- && - && -	-
Os10g0132700	43.0209	54.467	37.2286	169.474	96.8816	149.197	44.9055	138.518	-1.62497	6.28801e-09	5.42903e-07	-	10	2044042	2057059	+	2619	-	- && Q38834.2 RecName: Full=Disease resistance RPP13-like protein 4; AltName: Full=Disease resistance protein ZAR1; AltName: Full=Protein HOPZ-ACTIVATED RESISTANCE 1 && -	-
Os12g0215950	166.962	142.847	127.198	235.109	360.4	385.115	145.669	326.874	-1.16642	6.34454e-09	5.45792e-07	-	12	6138572	6141905	-	3334	-	- && - && PF08263:Leucine rich repeat N-terminal domain|PF13855:Leucine rich repeat	LRRNT_2
Os10g0100700	135.208	120.238	110.652	394.787	217.015	264.825	122.033	292.209	-1.25925	6.52524e-09	5.57283e-07	OsPDX1.3b	10	81102	82243	-	1142	-	- && Q8W3D0.1 RecName: Full=Probable pyridoxal 5'-phosphate synthase subunit PDX1.2; Short=PLP synthase subunit PDX1.2 && PF01680:SOR/SNZ family	-
Os08g0232700	66.5799	55.4947	56.8771	147.922	144.354	154.792	59.6506	149.023	-1.32094	6.60578e-09	5.60118e-07	OsEXO70FX4	8	8061317	8063491	+	2175	-	- && - && PF03081:Exo70 exocyst complex subunit	Exo70
Os08g0411000	35.8507	56.5224	62.0477	0.979619	8.71935	8.39233	51.4736	6.03043	3.0866	6.99452e-09	5.88859e-07	-	8	19661984	19663477	+	1422	-	- && Q9ZUY3.1 RecName: Full=Arogenate dehydratase 3, chloroplastic; Short=AtADT3; AltName: Full=Prephenate dehydratase 1; Short=AtPDT1; Flags: Precursor && PF00800:Prephenate dehydratase	-
Os01g0929100	109.601	78.1036	127.198	283.11	235.422	211.673	104.967	243.402	-1.21311	7.91199e-09	6.61392e-07	-	1	40785129	40786742	+	1077	-	- && Q9FG89.1 RecName: Full=Photosynthetic NDH subunit of subcomplex B 5, chloroplastic; Short=Protein PnsB5; AltName: Full=NAD(P)H dehydrogenase 18; Flags: Precursor && -	-
Os01g0718500	200.764	276.446	217.167	72.4918	103.663	116.56	231.459	97.5718	1.24488	8.1794e-09	6.78947e-07	-	1	29937455	29938094	+	507	-	- && - && -	-
novel.943	0	2.05536	0	240.007	75.5677	77.3959	0.68512	130.99	-7.57763	8.9703e-09	7.36842e-07	-	7	14642922	14649565	+	3559	-	PF14291:Domain of unknown function (DUF4371)	-
novel.319	41.9965	44.1902	47.5699	8.81657	4.84408	0.932481	44.5856	4.86438	3.20836	1.15184e-08	9.20576e-07	-	12	7842844	7846207	+	1552	-	-	-
Os09g0426800	249.931	237.394	249.225	739.612	429.186	414.954	245.517	527.917	-1.10407	1.24323e-08	9.90271e-07	WSL2	9	15493031	15497466	+	2366	-	- && Q8H1Z0.1 RecName: Full=Protein ECERIFERUM 3; AltName: Full=Protein FACELESS POLLEN 1; AltName: Full=Protein WAX2; AltName: Full=Protein YORE-YORE && PF12076:WAX2 C-terminal domain|PF04116:Fatty acid hydroxylase superfamily	-
Os01g0135700	87.066	97.6295	88.9351	169.474	248.986	205.146	91.2102	207.869	-1.18853	1.48019e-08	1.1595e-06	OsCML16	1	1931016	1931904	-	889	-	- && Q5ZCK5.1 RecName: Full=Probable calcium-binding protein CML16; AltName: Full=Calmodulin-like protein 16 && PF13499:EF-hand domain pair	-
Os03g0103200	1392.03	1738.83	1916.24	6424.34	4265.7	3867.93	1682.37	4852.66	-1.52827	1.51255e-08	1.18094e-06	OsHyPRP04	3	211082	211817	+	736	-	- && Q9SU35.1 RecName: Full=pEARLI1-like lipid transfer protein 1; AltName: Full=Protein AZELAIC ACID INDUCED 1; Flags: Precursor && PF14547:Hydrophobic seed protein	-
Os01g0332800	88.0903	66.7992	76.5255	208.659	189.888	150.129	77.1383	182.892	-1.24471	1.92186e-08	1.46663e-06	OsSCP3	1	12915334	12919209	-	1848	-	- && Q9LSM9.2 RecName: Full=Serine carboxypeptidase-like 33; Flags: Precursor && PF00450:Serine carboxypeptidase	Peptidase_S10
novel.679	46.0938	28.775	39.2969	0.979619	1.93763	0	38.0552	0.972417	5.30682	2.31187e-08	1.73625e-06	-	4	4550733	4553025	-	846	-	PF05754:Domain of unknown function (DUF834)	DUF834
Os10g0189100	196.667	178.816	156.153	422.216	384.62	275.082	177.212	360.639	-1.02435	2.44178e-08	1.82225e-06	OspPGM	10	6167200	6174593	-	2130	-	- && Q9M4G5.1 RecName: Full=Phosphoglucomutase, chloroplastic; Short=PGM; AltName: Full=Glucose phosphomutase; Flags: Precursor && PF02878:Phosphoglucomutase/phosphomannomutase, alpha/beta/alpha domain I|PF02879:Phosphoglucomutase/phosphomannomutase, alpha/beta/alpha domain II|PF00408:Phosphoglucomutase/phosphomannomutase, C-terminal domain|PF02880:Phosphoglucomutase/phosphomannomutase, alpha/bet…	PGM_PMM_III
Os03g0766800	24.5833	43.1625	27.9215	89.1453	141.447	92.3156	31.8891	107.636	-1.75477	2.75038e-08	2.0333e-06	-	3	31758042	31758599	+	558	-	- && - && -	-
Os07g0446100	290.903	286.723	293.693	847.371	467.938	495.147	290.439	603.485	-1.05474	2.82929e-08	2.06582e-06	XBOS34	7	15237188	15243001	-	2380	-	- && Q7XI08.1 RecName: Full=Probable E3 ubiquitin-protein ligase XBOS34; AltName: Full=Ankyrin repeat domain and RING finger-containing protein XBOS34; AltName: Full=XB3 protein homolog 4 && PF12796:Ankyrin repeats (3 copies)|PF13920:Zinc finger, C3HC4 type (RING finger)	-
Os03g0196600	137.257	136.681	122.027	339.928	248.986	234.985	131.989	274.633	-1.05645	3.27609e-08	2.37011e-06	-	3	5063818	5065197	-	1380	-	- && Q10QH1.1 RecName: Full=Probable serine acetyltransferase 4; AltName: Full=OsSERAT2;2 && PF06426:Serine acetyltransferase, N-terminal|PF00132:Bacterial transferase hexapeptide (six repeats)	Hexapep
Os04g0423400	191.545	205.536	184.075	535.852	326.491	340.356	193.719	400.899	-1.04881	3.54949e-08	2.55229e-06	OsAsr2	4	20934960	20936052	-	1093	-	- && - && -	-
Os02g0734600	149.549	199.37	201.655	437.89	295.489	370.195	183.525	367.858	-1.0032	4.06718e-08	2.90686e-06	-	2	30642392	30654596	+	1569	-	- && Q9CAB8.1 RecName: Full=Probable peroxygenase 5; Short=AtPXG5; AltName: Full=Caleosin-5 && PF05042:Caleosin related protein	-
Os10g0137300	1.02431	0	0	34.2867	43.5967	52.2189	0.341435	43.3674	-6.87935	4.1496e-08	2.95684e-06	-	10	2317204	2317845	+	495	-	- && - && -	-
Os07g0449100	82.9688	70.9099	53.7747	292.906	141.447	156.657	69.2178	197.003	-1.50815	5.27007e-08	3.65613e-06	-	7	15421991	15425210	-	764	-	- && O49636.1 RecName: Full=Mitochondrial pyruvate carrier 4 && PF03650:Uncharacterised protein family (UPF0041)	-
Os01g0605700	335.972	391.546	379.525	130.289	218.952	203.281	369.014	184.174	1.00188	5.78103e-08	3.96411e-06	OsSWEET6b	1	23864681	23867205	+	991	-	- && Q8W0K2.1 RecName: Full=Bidirectional sugar transporter SWEET6b; Short=OsSWEET6b && PF03083:Sugar efflux transporter for intercellular exchange	-
novel.821	163.889	169.567	185.109	70.5326	84.287	82.0583	172.855	78.9593	1.12986	6.03638e-08	4.11535e-06	-	6	7483363	7487545	+	2548	-	-	-
Os10g0133500	179.254	172.65	214.065	97.9619	87.1935	72.7335	188.656	85.963	1.13503	6.55083e-08	4.4278e-06	-	10	2087427	2091932	+	1762	-	- && Q0ING3.1 RecName: Full=Spermidine hydroxycinnamoyltransferase 2 && PF02458:Transferase family	-
Os06g0317100	53.2639	53.4393	46.5358	193.965	147.26	95.1131	51.0797	145.446	-1.50847	6.92218e-08	4.64256e-06	-	6	12273448	12274281	+	401	-	- && - && -	-
Os09g0522000	32.7778	15.4152	6.20477	85.2269	71.6924	90.4507	18.1326	82.4566	-2.18394	8.16338e-08	5.42475e-06	OsDREB1B	9	20395262	20395703	-	442	-	- && Q3T5N4.1 RecName: Full=Dehydration-responsive element-binding protein 1B; Short=Protein DREB1B && -	-
Os10g0135833	1.02431	0	0	46.0421	35.8462	36.3668	0.341435	39.4184	-6.7405	8.57111e-08	5.61763e-06	-	10	2220029	2222124	+	2096	-	- && - && -	-
Os06g0674100	329.827	282.612	337.126	101.88	112.383	203.281	316.521	139.181	1.18349	8.57237e-08	5.61763e-06	-	6	27975961	27979178	-	806	-	- && - && -	-
Os02g0610800	156.719	168.539	167.529	420.257	249.955	331.963	164.262	334.058	-1.02395	8.70246e-08	5.68713e-06	-	2	24000931	24003142	+	1439	-	- && - && PF06485:Protein of unknown function (DUF1092)	-
Os02g0569400	131.111	121.266	144.778	58.7772	51.3473	55.0164	132.385	55.0469	1.26608	1.06363e-07	6.7031e-06	CYP76M8	2	21690378	21692185	+	1808	-	- && Q6YTF1.1 RecName: Full=Oryzalexin D synthase; AltName: Full=Cytochrome P450 76M8; AltName: Full=Ent-cassadiene C11-alpha-hydroxylase 2 && PF00067:Cytochrome P450	p450
Os01g0714600	183.351	216.84	152.017	277.232	400.121	452.253	184.069	376.536	-1.03294	1.1232e-07	7.02953e-06	-	1	29708354	29709366	+	1013	-	- && - && -	-
Os03g0103300	54.2882	55.4947	70.3208	198.863	188.919	101.64	60.0346	163.141	-1.44145	1.18205e-07	7.33424e-06	qLTG-3-1(t)	3	219979	220919	+	941	-	- && Q39176.1 RecName: Full=Lipid transfer protein EARLI 1; AltName: Full=Protein EARLY ARABIDOPSIS ALUMINUM INDUCED 1; Short=pEARLI1; Flags: Precursor && PF14547:Hydrophobic seed protein	-
novel.722	35.8507	42.1349	26.8873	0	0.968816	0	34.9576	0.322939	6.6673	1.57361e-07	9.52093e-06	-	4	31431674	31433309	-	1237	-	-	-
Os10g0135650	0	0	0	14.6943	34.8774	20.5146	0	23.3621	-6.94793	1.6548e-07	9.98666e-06	-	10	2208448	2209029	-	582	-	- && - && -	-
Os10g0328600	234.566	123.322	163.392	57.7975	58.129	84.8558	173.76	66.9274	1.37504	1.95e-07	1.15617e-05	-	10	9212944	9216458	-	2420	-	- && Q9BZJ0.4 RecName: Full=Crooked neck-like protein 1; AltName: Full=Crooked neck homolog; Short=hCrn && -	-
Os05g0472500	66.5799	42.1349	52.7406	13.7147	0.968816	11.1898	53.8184	8.62442	2.64055	2.14842e-07	1.26117e-05	-	5	23209395	23209667	+	273	-	- && - && -	-
Os08g0207500	154.67	103.796	116.857	42.1236	48.4408	55.0164	125.107	48.5269	1.3653	2.19499e-07	1.27899e-05	OsZIP4	8	6267823	6270904	+	1722	-	- && Q6ZJ91.1 RecName: Full=Zinc transporter 4; AltName: Full=ZRT/IRT-like protein 4; Short=OsZIP4; Flags: Precursor && PF02535:ZIP Zinc transporter	-
Os12g0142900	43.0209	20.5536	7.2389	0	0	0	23.6044	0	7.06282	2.35975e-07	1.36825e-05	-	12	2094887	2097950	+	3064	-	- && P04323.1 RecName: Full=Retrovirus-related Pol polyprotein from transposon 17.6; Includes: RecName: Full=Protease; Includes: RecName: Full=Reverse transcriptase; Includes: RecName: Full=Endonuclease && -	-
Os11g0700500	92.1875	121.266	108.584	245.884	205.389	199.551	107.346	216.941	-1.01474	2.36804e-07	1.3697e-05	-	11	28703901	28705306	-	1199	-	- && Q53NK6.1 RecName: Full=Myb-related protein MYBAS1 && PF00249:Myb-like DNA-binding domain	Myb_DNA-binding
Os10g0508700	24.5833	8.22144	11.3754	78.3695	54.2537	63.4087	14.7267	65.344	-2.14857	2.38955e-07	1.37877e-05	-	10	19530118	19532281	-	1229	-	- && - && PF04043:Plant invertase/pectin methylesterase inhibitor	-
Os12g0567800	316.511	230.2	326.785	89.1453	158.886	153.859	291.165	133.964	1.11907	2.53519e-07	1.44867e-05	OsMT1f	12	23352196	23353175	-	535	-	- && Q2QNC3.1 RecName: Full=Metallothionein-like protein 4C; AltName: Full=Class I metallothionein-like protein 4C; AltName: Full=MT-1-4b; AltName: Full=OsMT-I-4c; AltName: Full=OsMT1c && PF01439:Metallothionein	-
Os01g0885700	167.986	214.785	201.655	75.4307	98.8193	104.438	194.809	92.8959	1.06732	3.42547e-07	1.90674e-05	-	1	38481235	38484005	+	2771	-	- && P17801.2 RecName: Full=Putative receptor protein kinase ZmPK1; Flags: Precursor && PF01453:D-mannose binding lectin|PF00069:Protein kinase domain|PF00954:S-locus glycoprotein domain	Pkinase
novel.959	40.9722	32.8857	16.5461	1.95924	1.93763	0	30.1347	1.29896	4.55328	3.94732e-07	2.15165e-05	-	7	23632674	23633671	+	909	-	-	-
Os01g0619900	19.4618	24.6643	23.785	55.8383	78.4741	96.978	22.637	77.0968	-1.76923	4.0018e-07	2.17634e-05	OsTCL2	1	24696532	24697792	-	1261	-	- && B3H4X8.1 RecName: Full=MYB-like transcription factor TCL2; AltName: Full=Protein CAPRICE-like MYB4; AltName: Full=Protein TRICHOMELESS 2 && -	-
Os11g0437600	2057.83	1347.29	1682.53	488.83	259.643	591.193	1695.88	446.555	1.92502	4.04806e-07	2.19142e-05	-	11	14267738	14268964	+	1227	-	- && - && PF04720:PDDEXK-like family of unknown function	-
Os12g0226700	2075.24	2276.31	2257.5	926.72	874.841	463.443	2203.02	755.001	1.54508	4.11138e-07	2.22061e-05	-	12	6911276	6913929	+	1246	-	- && Q9SLN8.1 RecName: Full=2-alkenal reductase (NADP(+)-dependent); AltName: Full=Alkenal double bound reductase; AltName: Full=Allylic alcohol dehydrogenase 1; Short=allyl-ADH1; AltName: Full=Flavin-free double bond reductase; Short=NtDBR; AltName: Full=Pulegone reductase; Short=NtRed-1 && PF16884:N-terminal domain of oxidoreductase|PF00107:Zinc-binding dehydrogenase	ADH_zinc_N
Os08g0331800	198.715	179.844	165.461	86.2065	93.0064	89.5182	181.34	89.577	1.01752	4.25325e-07	2.29201e-05	-	8	14663398	14664089	-	562	-	- && - && -	-
Os01g0975300	161.84	287.75	169.597	466.299	321.647	535.244	206.396	441.063	-1.09578	4.4156e-07	2.3687e-05	OsMYB48	1	43096401	43097949	+	1549	-	- && Q4JL76.1 RecName: Full=Myb-related protein MYBAS2 && PF00249:Myb-like DNA-binding domain	Myb_DNA-binding
Os12g0227050	52.2396	72.9652	97.2081	16.6535	28.0957	14.9197	74.1376	19.8896	1.89946	4.70442e-07	2.48421e-05	-	12	6916214	6918279	-	1119	-	- && Q9SLN8.1 RecName: Full=2-alkenal reductase (NADP(+)-dependent); AltName: Full=Alkenal double bound reductase; AltName: Full=Allylic alcohol dehydrogenase 1; Short=allyl-ADH1; AltName: Full=Flavin-free double bond reductase; Short=NtDBR; AltName: Full=Pulegone reductase; Short=NtRed-1 && -	-
novel.328	54.2882	24.6643	16.5461	1.95924	0.968816	0	31.8329	0.976018	5.04761	4.81685e-07	2.53227e-05	-	12	12963806	12964720	+	895	-	-	-
Os02g0252400	16.3889	26.7197	51.7064	2.93886	0	0	31.605	0.979619	5.0355	5.79426e-07	3.01263e-05	RPBF	2	8590318	8593735	-	1537	-	- && O24463.1 RecName: Full=Dof zinc finger protein PBF; AltName: Full=Prolamin box-binding factor && PF02701:Dof domain, zinc finger	zf-Dof
Os01g0695700	61.4584	62.6884	79.6279	208.659	166.636	115.628	67.9249	163.641	-1.26776	5.9768e-07	3.10073e-05	OsABCB4	1	28768976	28780102	+	3819	-	- && Q9FWX7.1 RecName: Full=ABC transporter B family member 11; Short=ABC transporter ABCB.11; Short=AtABCB11; AltName: Full=Multidrug resistance protein 8; AltName: Full=P-glycoprotein 11 && PF00005:ABC transporter|PF00664:ABC transporter transmembrane region	ABC_membrane
Os10g0465700	93.2119	131.543	99.2764	287.028	169.543	245.242	108.01	233.938	-1.11491	6.23697e-07	3.22157e-05	OsSTA246	10	17180759	17183189	+	2167	-	- && Q9LIR6.1 RecName: Full=Beta-amylase 1, chloroplastic; AltName: Full=1,4-alpha-D-glucan maltohydrolase; AltName: Full=Beta-amylase 7; AltName: Full=Thioredoxin-regulated beta-amylase; Short=TR-BAMY; Flags: Precursor && PF01373:Glycosyl hydrolase family 14	-
Os07g0511301	23.559	17.4706	14.4778	0	0	0	18.5025	0	6.71126	6.51676e-07	3.35876e-05	-	7	19533397	19533696	-	300	-	- && - && -	-
Os07g0432333	0	1.02768	0	79.3492	22.2828	10.2573	0.34256	37.2964	-6.65941	6.68563e-07	3.42342e-05	-	7	14303299	14304162	+	617	-	- && - && -	-
Os04g0657300	31.7535	29.8027	38.2628	125.391	73.63	90.4507	33.273	96.4906	-1.53577	6.90145e-07	3.51307e-05	-	4	33524754	33525163	-	410	-	- && - && -	-
Os01g0928600	214.08	200.397	150.983	31.3478	70.7236	101.64	188.487	67.9039	1.47047	6.95179e-07	3.52342e-05	-	1	40759332	40763911	-	1925	-	- && Q8RYL1.1 RecName: Full=Long chain base biosynthesis protein 2b && PF00155:Aminotransferase class I and II	Aminotran_1_2
Os01g0104900	36.875	31.8581	20.6826	64.6549	92.0375	131.48	29.8052	96.0574	-1.68906	6.95539e-07	3.52342e-05	-	1	270179	275084	-	1773	-	- && Q5SMM6.1 RecName: Full=Hydroxycinnamoyltransferase 4; Short=OsHCT4; AltName: Full=BAHD-like hydroxycinnamoyl transferase HCT4; AltName: Full=Glycerol hydroxycinnamoyl transferase && PF02458:Transferase family	-
Os08g0101700	68.6285	59.6054	56.8771	152.821	125.946	133.345	61.7037	137.37	-1.15426	8.23772e-07	4.12008e-05	-	8	95831	96937	-	1107	-	- && Q6I681.1 RecName: Full=Ascorbate-specific transmembrane electron transporter 1; AltName: Full=Cytochrome b561-1; Short=Zmb561 && PF03188:Eukaryotic cytochrome b561	Cytochrom_B561
Os02g0102200	57.3611	41.1072	53.7747	142.045	120.133	105.37	50.7477	122.516	-1.27091	9.23208e-07	4.56911e-05	OsAAP7C	2	119391	121684	+	1814	-	- && Q39134.2 RecName: Full=Amino acid permease 3; AltName: Full=Amino acid transporter AAP3 && PF01490:Transmembrane amino acid transporter protein	Aa_trans
Os04g0567200	28.6806	33.9134	23.785	0	4.84408	1.86496	28.793	2.23635	3.68501	1.06094e-06	5.19641e-05	OsALMT8	4	28500006	28502492	-	2227	-	- && O23086.2 RecName: Full=Aluminum-activated malate transporter 10; Short=AtALMT10 && PF11744:Aluminium activated malate transporter	-
Os09g0472200	60.4341	134.626	32.058	15.6739	9.68816	20.5146	75.706	15.2922	2.30569	1.11726e-06	5.4497e-05	OsABCG23	9	18044671	18050946	+	2151	-	- && Q8RXN0.1 RecName: Full=ABC transporter G family member 11; Short=ABC transporter ABCG.11; Short=AtABCG11; AltName: Full=Protein CUTICULAR DEFECT AND ORGAN FUSION 1; AltName: Full=Protein DESPERADO; AltName: Full=Protein PERMEABLE LEAVES 1; AltName: Full=White-brown complex homolog protein 11; Short=AtWBC11 && PF00005:ABC transporter|PF01061:ABC-2 type transporter	ABC2_membrane
Os01g0580500	317.535	298.027	142.71	97.9619	88.1623	130.547	252.757	105.557	1.25904	1.14461e-06	5.54964e-05	ACO7	1	22489496	22490967	+	1183	-	- && Q9ZUN4.1 RecName: Full=1-aminocyclopropane-1-carboxylate oxidase 1; Short=ACC oxidase 1; Short=AtACO1 && PF03171:2OG-Fe(II) oxygenase superfamily|PF14226:non-haem dioxygenase in morphine synthesis N-terminal	2OG-FeII_Oxy
novel.495	50.191	41.1072	43.4334	12.735	9.68816	5.59489	44.9105	9.33937	2.27059	1.14479e-06	5.54964e-05	-	2	21644661	21649054	-	689	-	-	-
Os03g0233000	219.201	337.079	357.809	136.167	126.915	187.429	304.696	150.17	1.0197	1.22103e-06	5.88309e-05	-	3	7061772	7063303	+	1428	-	- && Q9LVR5.1 RecName: Full=Calcium uniporter protein 3, mitochondrial; Flags: Precursor && PF04678:Mitochondrial calcium uniporter	-
Os12g0240900	28370.2	24669.4	27812.9	3148.5	4009.93	654.602	26950.8	2604.34	3.37135	1.38247e-06	6.47626e-05	NOMT	12	7801961	7807354	-	1304	-	- && Q0IP69.2 RecName: Full=Naringenin 7-O-methyltransferase; Short=NOMT; Short=OsNOMT && PF00891:O-methyltransferase|PF08100:Dimerisation domain	-
Os12g0555400	184.375	218.896	225.44	75.4307	86.2247	134.277	209.57	98.6442	1.0851	1.39271e-06	6.51135e-05	-	12	22597827	22598994	+	1015	-	- && Q94A08.2 RecName: Full=Probable galactinol--sucrose galactosyltransferase 2; AltName: Full=Protein SEED IMBIBITION 2; AltName: Full=Raffinose synthase 2 && PF05691:Raffinose synthase or seed imbibition protein Sip1	-
Os07g0421000	2.04861	0	0	51.9198	25.1892	20.5146	0.682871	32.5412	-5.56774	1.39879e-06	6.52686e-05	OsFBX234	7	13513636	13515776	-	1530	-	- && - && PF12937:F-box-like	-
novel.61	0	0	0	3.91848	31.9709	25.177	0	20.3555	-6.75014	1.42231e-06	6.61052e-05	-	1	436157	437294	-	1138	-	PF13456:Reverse transcriptase-like	-
Os03g0321300	41.9965	45.2179	38.2628	139.106	110.445	79.2609	41.8257	109.604	-1.38865	1.54924e-06	7.09929e-05	OsFbox137	3	11613231	11614737	+	1507	-	- && Q9FNK5.1 RecName: Full=F-box protein At5g46170 && PF12937:F-box-like	-
Os03g0109000	31.7535	44.1902	42.3993	123.432	110.445	78.3284	39.4477	104.068	-1.39876	1.63005e-06	7.41577e-05	ONAC055	3	524008	525278	+	1077	-	- && Q84TE6.2 RecName: Full=NAC domain-containing protein 21/22; Short=ANAC021/ANAC022 && PF02365:No apical meristem (NAM) protein	NAM
Os02g0770800	173.108	115.1	189.246	438.869	298.395	253.635	159.151	330.3	-1.05293	1.64767e-06	7.48158e-05	OsNIA1	2	32513749	32517155	-	3050	-	- && P27968.1 RecName: Full=Nitrate reductase [NAD(P)H] && PF00173:Cytochrome b5-like Heme/Steroid binding domain|PF03404:Mo-co oxidoreductase dimerisation domain|PF00174:Oxidoreductase molybdopterin binding domain|PF00970:Oxidoreductase FAD-binding domain|PF00175:Oxidoreductase NAD-binding domain	NAD_binding_1
Os08g0355400	76.823	33.9134	44.4675	200.822	135.634	100.708	51.7346	145.721	-1.4929	1.68992e-06	7.62948e-05	-	8	16235884	16247701	+	1967	-	- && - && PF03140:Plant protein of unknown function	-
Os07g0119800	110.625	214.785	149.949	46.0421	64.9107	79.2609	158.453	63.4046	1.31982	1.79245e-06	8.06252e-05	-	7	1067127	1067558	+	432	-	- && - && PF04398:Protein of unknown function, DUF538	-
novel.994	1.02431	0	1.03413	56.8179	27.1269	13.9872	0.686145	32.644	-5.5711	1.87622e-06	8.38079e-05	-	7	15186839	15191343	-	1508	-	-	-
Os01g0278900	78.8716	75.0206	77.5597	167.515	140.478	162.252	77.1506	156.748	-1.02275	1.87794e-06	8.38079e-05	RPL5	1	9859354	9860677	+	624	-	- && - && -	-
Os12g0239900	59.4098	69.8822	87.9009	21.5516	23.2516	1.86496	72.3976	15.5561	2.22461	1.88113e-06	8.38079e-05	OsABCG49	12	7731409	7731961	-	553	-	- && Q2QV81.3 RecName: Full=ABC transporter G family member 49; Short=OsABCG49; AltName: Full=Pleiotropic drug resistance protein 22; Short=OsPDR22 && -	-
Os05g0348100	39.9479	33.9134	78.5938	195.924	107.539	125.885	50.8184	143.116	-1.49384	1.93014e-06	8.52037e-05	-	5	16421495	16423179	-	976	-	- && Q9CAC5.1 RecName: Full=NAD(P)H-quinone oxidoreductase subunit L, chloroplastic; AltName: Full=NAD(P)H dehydrogenase subunit L; Short=NDH subunit L; Short=NDH-L; AltName: Full=NADH-plastoquinone oxidoreductase subunit L; AltName: Full=Protein CHLORORESPIRATORY REDUCTION 23; Flags: Precursor && -	-
novel.819	6.14584	7.19376	4.13651	40.1644	54.2537	21.4471	5.82537	38.6217	-2.72716	1.93407e-06	8.52037e-05	-	6	7360326	7361812	+	1487	-	-	-
Os04g0201800	19.4618	22.6089	34.1262	98.9415	79.4429	59.6788	25.399	79.3544	-1.64312	2.11715e-06	9.1564e-05	-	4	6912953	6925360	-	1209	-	- && - && PF01490:Transmembrane amino acid transporter protein	Aa_trans
Os06g0210200	27.6563	3.08304	0	1309.75	1168.39	1023.86	10.2464	1167.34	-6.83158	2.51385e-06	0.000106961	-	6	5621964	5625687	+	1857	-	- && Q5RFB0.2 RecName: Full=Aminoacylase-1; Short=ACY-1; AltName: Full=N-acyl-L-amino-acid amidohydrolase && PF01546:Peptidase family M20/M25/M40	Peptidase_M20
Os05g0217700	66.5799	40.0795	65.1501	715.122	498.94	157.589	57.2698	457.217	-2.99693	2.78496e-06	0.000117023	OsBURP07	5	7249980	7251356	+	1088	-	- && Q60E34.1 RecName: Full=BURP domain-containing protein 7; Short=OsBURP07; Flags: Precursor && -	-
Os01g0939600	33.8021	33.9134	45.5017	131.269	85.2558	83.9233	37.7391	100.149	-1.40752	2.91096e-06	0.000121669	GPDH2	1	41245588	41249894	+	2079	-	- && Q8S0G4.1 RecName: Full=Probable glycerol-3-phosphate dehydrogenase [NAD(+)] 1, cytosolic && PF01210:NAD-dependent glycerol-3-phosphate dehydrogenase N-terminus|PF07479:NAD-dependent glycerol-3-phosphate dehydrogenase C-terminus	NAD_Gly3P_dh_C
Os07g0511400	319.583	402.85	407.447	32.3274	4.84408	1.86496	376.627	13.0122	4.85733	3.04595e-06	0.000125975	-	7	19533865	19534577	+	713	-	- && - && -	-
Os11g0701500	237.639	268.224	222.338	165.556	90.0999	105.37	242.734	120.342	1.01322	3.07098e-06	0.000126789	-	11	28739616	28740634	+	1019	-	- && Q53NL5.1 RecName: Full=Xylanase inhibitor protein 2; AltName: Full=Class III chitinase homolog h; Flags: Precursor && PF00704:Glycosyl hydrolases family 18	-
Os08g0410900	78.8716	86.3251	66.1842	3.91848	31.9709	21.4471	77.127	19.1122	2.01067	3.31707e-06	0.000135063	-	8	19657493	19661886	-	1626	-	- && - && -	-
Os06g0571800	41.9965	55.4947	61.0136	134.208	110.445	114.695	52.8349	119.783	-1.18087	3.7846e-06	0.000152525	OsGATA16	6	22155054	22157054	+	1645	-	- && - && -	-
novel.340	132.135	158.263	176.836	51.9198	71.6924	90.4507	155.745	71.3543	1.12416	4.00464e-06	0.00015976	-	12	20846786	20852115	+	2087	-	-	-
Os08g0534350	31.7535	25.692	74.4573	132.249	112.383	124.02	43.9676	122.884	-1.48347	4.3666e-06	0.000172455	-	8	26658525	26667717	+	769	-	- && - && PF09753:Membrane fusion protein Use1	-
Os11g0644600	86.0417	66.7992	69.2866	132.249	151.135	168.779	74.0425	150.721	-1.02585	5.81577e-06	0.00022481	-	11	25589890	25591645	+	1756	-	- && - && -	-
Os12g0242500	222.274	216.84	195.45	145.963	78.4741	63.4087	211.522	95.9487	1.14237	5.93294e-06	0.000228592	-	12	7892375	7893898	+	1524	-	- && - && -	-
Os07g0677100	244.809	139.764	381.593	1523.31	1367	754.377	255.389	1214.89	-2.25006	6.32961e-06	0.000243479	POX8.1	7	28669498	28671384	+	1254	-	- && A2YPX3.2 RecName: Full=Peroxidase 2; Flags: Precursor && PF00141:Peroxidase	-
Os07g0533300	101.406	57.55	50.6723	26.4497	20.3451	17.7171	69.8762	21.504	1.70214	6.9128e-06	0.00026292	-	7	20919296	20920819	-	1524	-	- && Q766C2.1 RecName: Full=Aspartic proteinase nepenthesin-2; AltName: Full=Nepenthesin-II; Flags: Precursor && PF14541:Xylanase inhibitor C-terminal|PF14543:Xylanase inhibitor N-terminal	-
Os08g0404350	0	1.02768	0	28.409	24.2204	14.9197	0.34256	22.5164	-5.9318	6.92598e-06	0.000262998	-	8	19314778	19315440	+	663	-	- && Q7X923.2 RecName: Full=FACT complex subunit SPT16; AltName: Full=Facilitates chromatin transcription complex subunit SPT16 && PF14826:FACT complex subunit SPT16 N-terminal lobe domain	-
Os05g0490900	115.747	135.654	131.334	319.356	166.636	281.609	127.578	255.867	-1.00412	7.10643e-06	0.000269418	-	5	24127396	24128452	-	889	-	- && - && -	-
Os09g0388400	91.1632	79.1313	117.891	42.1236	27.1269	43.8266	96.0617	37.6924	1.34872	7.14082e-06	0.000270289	-	9	13319823	13325701	+	1303	-	- && Q5XD45.1 RecName: Full=Putative phosphatase M6_Spy0533 && PF08282:haloacid dehalogenase-like hydrolase	Hydrolase_3
Os11g0136600	52.2396	40.0795	62.0477	15.6739	9.68816	16.7847	51.4556	14.0489	1.8714	7.40374e-06	0.000278016	OsCDPK25	11	1691861	1694288	+	1938	-	- && Q2RAV0.1 RecName: Full=Calcium-dependent protein kinase 25; Short=OsCDPK25; Short=OsCPK25 && PF00069:Protein kinase domain|PF13499:EF-hand domain pair	Pkinase
Os07g0445600	241.736	208.619	179.938	1092.28	666.546	428.009	210.098	728.943	-1.7946	7.63388e-06	0.0002853	-	7	15204094	15211471	-	3908	-	- && - && -	-
Os12g0583300	53.2639	63.7161	70.3208	242.946	130.79	98.843	62.4336	157.526	-1.33434	7.90064e-06	0.000294803	-	12	24212538	24214065	+	1528	-	- && Q766C3.1 RecName: Full=Aspartic proteinase nepenthesin-1; AltName: Full=Nepenthesin-I; Flags: Precursor && PF14543:Xylanase inhibitor N-terminal|PF14541:Xylanase inhibitor C-terminal	-
Os03g0195300	29.7049	34.9411	62.0477	134.208	129.821	76.4634	42.2312	113.498	-1.42595	8.07847e-06	0.000300964	OsSultr2	3	4946360	4950941	-	2421	-	- && O04722.1 RecName: Full=Sulfate transporter 2.1; AltName: Full=AST68 && PF00916:Sulfate permease family|PF01740:STAS domain	Sulfate_transp
Os01g0117900	60.4341	65.7715	47.5699	133.228	199.576	91.3831	57.9252	141.396	-1.28655	8.0974e-06	0.000301195	OsUMAMIT1	1	1010259	1012400	+	1503	-	- && Q9LV20.1 RecName: Full=WAT1-related protein At3g18200 && PF00892:EamA-like transporter family	DUF6
Os11g0491600	28.6806	21.5813	12.4095	0.979619	0	0	20.8905	0.32654	5.9247	9.08511e-06	0.000333737	-	11	17384670	17387292	-	2623	-	- && - && -	-
novel.1095	27.6563	47.2733	50.6723	118.534	79.4429	117.493	41.8673	105.156	-1.32927	9.16911e-06	0.00033578	-	8	16255099	16259596	-	3291	-	-	-
Os12g0148500	46.0938	43.1625	41.3651	6.85733	14.5322	11.1898	43.5405	10.8598	2.00217	9.64766e-06	0.000351671	-	12	2386716	2387272	-	557	-	- && - && -	-
Os01g0186900	14.3403	46.2456	24.8191	62.6956	119.164	88.5857	28.4683	90.1486	-1.66323	1.05368e-05	0.00037768	-	1	4646434	4648130	+	1697	-	- && - && -	-
Os11g0621400	44.0452	41.1072	49.6382	137.147	85.2558	96.978	44.9302	106.46	-1.24411	1.05559e-05	0.000377793	-	11	24226400	24227678	-	594	-	- && - && -	-
Os02g0208500	86.0417	53.4393	52.7406	145.963	143.385	124.02	64.0739	137.789	-1.10394	1.06659e-05	0.000381151	OsCDT4	2	6078179	6079111	-	673	-	- && - && -	-
Os01g0832100	45.0695	23.6366	23.785	113.636	74.5989	72.7335	30.8304	86.9894	-1.49528	1.1043e-05	0.000390499	OsGELP27	1	35605705	35607771	+	1381	-	- && Q9SIZ6.1 RecName: Full=GDSL esterase/lipase At2g40250; AltName: Full=Extracellular lipase At2g40250; Flags: Precursor && PF00657:GDSL-like Lipase/Acylhydrolase	Lipase_GDSL
Os12g0230600	156.719	199.37	208.894	122.452	63.9419	87.6532	188.328	91.3492	1.04432	1.12026e-05	0.000395551	-	12	7130738	7132096	+	1173	-	- && - && PF07939:Protein of unknown function (DUF1685)	-
Os02g0814400	65.5556	83.242	44.4675	162.617	99.7881	195.821	64.4217	152.742	-1.2458	1.16741e-05	0.000409756	-	2	34901670	34903148	+	695	-	- && - && -	-
Os03g0678800	10.2431	18.4982	11.3754	33.3071	64.9107	55.0164	13.3722	51.078	-1.93398	1.23411e-05	0.000429975	-	3	26878159	26879403	+	1245	-	- && Q9LN68.1 RecName: Full=Probable galacturonosyltransferase-like 1; AltName: Full=Protein GAOLAOZHUANGREN 1; AltName: Full=Protein PARVUS && PF01501:Glycosyl transferase family 8	Glyco_transf_8
Os10g0210500	48.1424	71.9376	65.1501	200.822	116.258	111.898	61.7434	142.993	-1.21091	1.24384e-05	0.000431459	OsUMAMIT15	10	7810692	7817132	-	2882	-	- && Q9SUF1.1 RecName: Full=WAT1-related protein At4g08290 && -	-
Os01g0875700	99.3577	86.3251	86.8668	214.537	201.514	129.615	90.8499	181.888	-1.00048	1.32312e-05	0.000456949	OsDjB2	1	38009641	38011902	+	1329	-	- && B1LCI2.1 RecName: Full=Chaperone protein DnaJ && PF01556:DnaJ C terminal domain|PF00226:DnaJ domain	DnaJ_C
Os04g0606601	0	0	0	12.735	14.5322	12.1223	0	13.1298	-6.11644	1.33186e-05	0.00045863	-	4	30673925	30674285	-	361	-	- && - && -	-
Os01g0108400	39.9479	39.0518	27.9215	103.84	228.641	568.813	35.6404	300.431	-3.07557	1.37387e-05	0.000471722	-	1	455707	457425	+	772	-	- && - && -	-
Os10g0516100	85.0174	78.1036	97.2081	228.251	155.979	140.805	86.7764	175.012	-1.01139	1.45849e-05	0.000496454	OsGDCH	10	19894753	19896794	+	824	-	- && A2Z9B8.1 RecName: Full=Glycine cleavage system H protein, mitochondrial; Flags: Precursor >A3C6G9.1 RecName: Full=Glycine cleavage system H protein, mitochondrial; Flags: Precursor && PF01597:Glycine cleavage H-protein	-
Os11g0639300	33.8021	34.9411	27.9215	75.4307	76.5365	87.6532	32.2216	79.8735	-1.30993	1.55086e-05	0.000521886	-	11	25276091	25278366	+	2276	-	- && - && PF13968:Domain of unknown function (DUF4220)|PF04578:Protein of unknown function, DUF594	-
novel.983	12.2917	23.6366	20.6826	0.979619	0	0	18.8703	0.32654	5.77755	1.71224e-05	0.000568112	-	7	7391520	7393645	-	1473	-	PF04827:Plant transposon protein	DUF635
Os05g0276100	15.3646	20.5536	19.6484	0	0.968816	0	18.5222	0.322939	5.75075	1.75172e-05	0.000578775	OsCHX14	5	11335063	11337911	+	2730	-	- && Q9LUN4.1 RecName: Full=Cation/H(+) antiporter 19; AltName: Full=Protein CATION/H+ EXCHANGER 19; Short=AtCHX19 && PF00999:Sodium/hydrogen exchanger family	Na_H_Exchanger
Os12g0218800	63.507	67.8268	62.0477	29.3886	22.2828	8.39233	64.4605	20.0212	1.69184	1.82371e-05	0.000597557	-	12	6354156	6354747	+	592	-	- && - && -	-
Os11g0528500	55.3125	61.6608	67.2184	176.331	116.258	106.303	61.3972	132.964	-1.11404	1.94678e-05	0.000634366	-	11	19180636	19182258	-	837	-	- && - && -	-
Os10g0135700	1.02431	0	0	26.4497	8.71935	25.177	0.341435	20.1154	-5.7707	1.96266e-05	0.00063866	-	10	2211559	2212224	-	666	-	- && - && -	-
Os03g0103100	10.2431	11.3045	8.27303	43.1032	35.8462	40.0967	9.94019	39.682	-1.9968	1.97691e-05	0.000642413	OsHyPRP03	3	208340	209118	+	779	-	- && Q01595.1 RecName: Full=Cortical cell-delineating protein; AltName: Full=Root-specific protein ZRP3; Flags: Precursor && PF14547:Hydrophobic seed protein	-
Os03g0122200	51.2153	101.74	70.3208	162.617	133.697	173.441	74.4254	156.585	-1.07342	2.15333e-05	0.000689383	-	3	1232247	1234438	-	984	-	- && Q9MAP3.1 RecName: Full=50S ribosomal protein L11, chloroplastic; AltName: Full=CL11; Flags: Precursor && PF03946:Ribosomal protein L11, N-terminal domain|PF00298:Ribosomal protein L11, RNA binding domain	-
novel.594	50.191	41.1072	56.8771	104.819	111.414	101.64	49.3918	105.958	-1.10117	2.3759e-05	0.00074743	-	3	23789030	23793121	-	2857	-	PF08387:FBD	-
Os07g0241500	50.191	46.2456	59.9795	121.473	92.0375	122.155	52.1387	111.888	-1.10206	2.43603e-05	0.000763299	OsUGT710C2	7	7900573	7902415	+	1618	-	- && B4G072.1 RecName: Full=DIMBOA UDP-glucosyltransferase BX9; AltName: Full=2,4-dihydroxy-7-methoxy-2H-1,4-benzoxazin-3(4H)-one 2-D-glucosyltransferase BX9; AltName: Full=Protein BENZOXAZINLESS 9 && PF00201:UDP-glucoronosyl and UDP-glucosyl transferase	UDPGT
Os01g0796000	30.7292	40.0795	41.3651	13.7147	5.8129	5.59489	37.3913	8.37415	2.16326	2.46677e-05	0.00077191	-	1	33713552	33714121	+	570	-	- && - && -	-
Os03g0285200	79.8959	80.159	85.8327	19.5924	39.7215	37.2992	81.9625	32.2044	1.34586	2.52384e-05	0.000788724	-	3	9827520	9828763	+	1244	-	- && - && -	-
Os01g0266400	101.406	95.5742	87.9009	35.2663	48.4408	43.8266	94.9605	42.5112	1.159	2.54163e-05	0.000793237	-	1	9113868	9114423	+	556	-	- && - && -	-
Os12g0114800	3.07292	2.05536	1.03413	73.4714	14.5322	4.6624	2.05414	30.8887	-3.90734	2.81913e-05	0.000870655	OsLTP1.16	12	727802	728559	+	668	-	- && Q2QYL3.1 RecName: Full=Non-specific lipid-transfer protein 3; Short=LTP 3; Flags: Precursor >A2ZAS9.1 RecName: Full=Non-specific lipid-transfer protein 3; Short=LTP 3; Flags: Precursor && PF00234:Protease inhibitor/seed storage/LTP family	-
novel.995	30.7292	45.2179	37.2286	1.95924	10.657	11.1898	37.7252	7.93533	2.24366	2.95477e-05	0.000905453	-	7	15518839	15520478	-	1141	-	-	-
novel.1041	0	1.02768	1.03413	26.4497	27.1269	11.1898	0.687269	21.5888	-4.97441	2.9945e-05	0.00091644	-	8	11639855	11642165	+	1179	-	-	-
Os11g0225300	1.02431	1.02768	0	41.144	0.968816	41.9616	0.683995	28.0248	-5.3541	3.04008e-05	0.00092517	Os11gRGA5	11	6554522	6561687	+	4296	-	- && Q9STE7.1 RecName: Full=Putative disease resistance RPP13-like protein 3 && PF00931:NB-ARC domain	NB-ARC
Os02g0577300	217.153	189.093	171.665	41.144	93.9752	122.155	192.637	85.7581	1.1656	3.04258e-05	0.00092517	-	2	22175977	22178701	+	1884	-	- && Q8L7F9.1 RecName: Full=Beta-1,3-galactosyltransferase GALT1; AltName: Full=Beta-1,3-galactosyltransferase 15; AltName: Full=Galactosyltransferase 1 && PF00337:Galactoside-binding lectin|PF01762:Galactosyltransferase	Galactosyl_T
Os05g0445900	13.316	35.9688	15.5119	57.7975	78.4741	63.4087	21.5989	66.5601	-1.62359	3.3195e-05	0.000995302	ROS1c	5	21843346	21856444	-	6242	-	- && Q9SJQ6.2 RecName: Full=Protein ROS1; AltName: Full=DEMETER-like protein 1; AltName: Full=Repressor of silencing 1 && PF15628:RRM in Demeter	-
Os06g0142400	89.1146	58.5777	41.3651	9.79619	30.0333	14.9197	63.0192	18.2497	1.78845	3.56446e-05	0.00106202	OsENOD93	6	2212615	2213482	-	636	-	- && Q02921.1 RecName: Full=Early nodulin-93; Short=N-93 && PF03386:Early nodulin 93 ENOD93 protein	-
Os01g0972000	24.5833	34.9411	24.8191	57.7975	84.287	75.531	28.1145	72.5385	-1.36773	3.89644e-05	0.00115511	OsRFPH2-3	1	42884953	42886230	+	1278	-	- && O22283.1 RecName: Full=Probable E3 ubiquitin-protein ligase RHC2A; AltName: Full=RING-H2 finger C2a; AltName: Full=RING-H2 zinc finger protein RHC2a && PF06547:Protein of unknown function (DUF1117)|PF14369:zinc-ribbon|PF13639:Ring finger domain	-
Os07g0511100	13.316	4.11072	17.5802	0	0	0	11.669	0	6.04585	3.94607e-05	0.00116545	-	7	19515060	19516021	+	962	-	- && - && -	-
Os04g0534600	56.3368	77.076	70.3208	184.168	105.601	135.21	67.9112	141.66	-1.06044	3.9828e-05	0.00117483	PEX11-4	4	26720079	26721025	+	947	-	- && Q7XU74.2 RecName: Full=Peroxisomal membrane protein 11-4; AltName: Full=OsPEX11-4; AltName: Full=Peroxin-11-4 >Q01IH3.1 RecName: Full=Peroxisomal membrane protein 11-4; AltName: Full=OsPEX11-4; AltName: Full=Peroxin-11-4 && PF05648:Peroxisomal biogenesis factor 11 (PEX11)	-
novel.156	100.382	120.238	96.174	41.144	34.8774	64.3412	105.598	46.7875	1.17202	3.98927e-05	0.00117527	-	10	20607422	20608505	+	992	-	PF02798:Glutathione S-transferase, N-terminal domain	GST_N
Os07g0418500	59.4098	139.764	65.1501	22.5312	41.6591	27.0419	88.1081	30.4108	1.53491	3.99472e-05	0.00117541	OsCYP709C9	7	13323931	13326242	+	1945	-	- && F4IK45.1 RecName: Full=Cytochrome P450 709B2 && -	-
novel.389	9.21875	6.16608	18.6143	0	0	0	11.333	0	6.00356	4.18641e-05	0.0012242	-	12	22033278	22034232	-	955	-	-	-
Os03g0181500	30.7292	45.2179	31.0239	136.167	65.8795	75.531	35.657	92.5258	-1.37478	4.63005e-05	0.00132767	ONI1	3	4266978	4271781	+	1912	-	- && Q570B4.2 RecName: Full=3-ketoacyl-CoA synthase 10; Short=KCS-10; AltName: Full=Protein FIDDLEHEAD; AltName: Full=Very long-chain fatty acid condensing enzyme 10; Short=VLCFA condensing enzyme 10 && PF08392:FAE1/Type III polyketide synthase-like protein|PF08541:3-Oxoacyl-[acyl-carrier-protein (ACP)] synthase III C terminal	-
Os11g0517800	71.7014	86.3251	77.5597	37.2255	33.9086	29.8394	78.5287	33.6578	1.22329	4.67654e-05	0.00133938	-	11	18560178	18575490	-	2034	-	- && Q0WP44.1 RecName: Full=Protein HASTY 1; AltName: Full=Protein HASTY && -	-
novel.1048	6.14584	0	0	103.84	71.6924	75.531	2.04861	83.6877	-5.35018	4.70106e-05	0.00134478	-	8	14616217	14659404	+	2636	-	-	-
Os08g0504500	15.3646	14.3875	10.3413	46.0421	33.9086	57.8138	13.3645	45.9215	-1.78124	4.72075e-05	0.00134878	-	8	24935623	24936616	+	994	-	- && P82658.2 RecName: Full=Thylakoid lumenal 19 kDa protein, chloroplastic; AltName: Full=P19; Flags: Precursor && PF01789:PsbP	-
Os05g0516100	13.316	7.19376	8.27303	45.0625	32.9398	35.4343	9.59425	37.8122	-1.97767	5.108e-05	0.00144545	-	5	25589277	25589836	-	560	-	- && - && -	-
Os11g0151700	59.4098	96.6019	81.6962	192.985	112.383	182.766	79.2359	162.711	-1.03838	5.16992e-05	0.00145775	OsPAP21b	11	2423636	2426379	-	1768	-	- && Q8S340.1 RecName: Full=Purple acid phosphatase 22; Flags: Precursor && PF14008:Iron/zinc purple acid phosphatase-like protein C|PF16656:Purple acid Phosphatase, N-terminal domain|PF00149:Calcineurin-like phosphoesterase	Metallophos
novel.966	13.316	17.4706	18.6143	44.0829	46.5032	59.6788	16.4669	50.0883	-1.60607	5.90359e-05	0.00163726	-	7	26934323	26937338	+	3016	-	-	-
Os11g0209000	11.2674	2.05536	3.10239	448.666	9.68816	372.06	5.47504	276.805	-5.65949	5.91038e-05	0.00163726	-	11	5605253	5607081	+	364	-	- && - && -	-
novel.788	106.528	103.796	107.549	59.7568	35.8462	55.0164	105.958	50.2065	1.07729	6.02582e-05	0.00166339	-	5	14317393	14327074	-	2163	-	-	-
Os02g0744000	28.6806	23.6366	34.1262	89.1453	50.3784	83.9233	28.8145	74.4824	-1.37054	6.25191e-05	0.00171779	-	2	31202228	31203685	+	930	-	- && Q8RXS1.1 RecName: Full=Photosynthetic NDH subunit of subcomplex B 4, chloroplastic; Short=Protein PnsB4; AltName: Full=NDH DEPENDENT FLOW 6; AltName: Full=NDH-DEPENDENT CYCLIC ELECTRON FLOW 6; Flags: Precursor && -	-
novel.787	41.9965	59.6054	61.0136	8.81657	13.5634	27.0419	54.2052	16.474	1.71269	6.49252e-05	0.0017736	-	5	13565356	13566287	-	821	-	-	-
Os10g0134900	0	0	0	6.85733	16.4699	9.32481	0	10.884	-5.84591	6.50495e-05	0.00177494	-	10	2163122	2164565	+	1444	-	- && - && -	-
Os06g0132500	0	0	1.03413	20.572	4.84408	27.0419	0.34471	17.486	-5.56935	6.56503e-05	0.00178902	OsBDG	6	1736723	1742581	-	2184	-	- && O22977.1 RecName: Full=Probable lysophospholipase BODYGUARD 3; Short=AtBDG3; Flags: Precursor && PF00561:alpha/beta hydrolase fold	Abhydrolase_1
Os01g0823700	56.3368	66.7992	37.2286	129.31	116.258	96.0455	53.4549	113.871	-1.09006	6.63705e-05	0.00180267	-	1	35176451	35180214	-	3473	-	- && Q9M0R7.1 RecName: Full=RING-H2 finger protein ATL39; AltName: Full=RING-type E3 ubiquitin transferase ATL39 && -	-
Os03g0658800	2.04861	2.05536	2.06826	13.7147	3.87527	65.2737	2.05741	27.6212	-3.74924	6.75682e-05	0.0018289	OsCYP87C2	3	25746127	25760738	-	2323	-	- && Q7XU38.3 RecName: Full=Cytochrome P450 87A3 && PF00067:Cytochrome P450	p450
Os12g0204100	48.1424	43.1625	50.6723	22.5312	8.71935	1.86496	47.3257	11.0385	2.10783	6.80334e-05	0.00183571	OsNIP3	12	5436086	5439545	+	1388	-	- && Q7EYH7.1 RecName: Full=Aquaporin NIP3-2; AltName: Full=NOD26-like intrinsic protein 3-2; AltName: Full=OsNIP3;2 && PF00230:Major intrinsic protein	-
Os12g0210500	108.576	130.515	103.413	30.3682	70.7236	52.2189	114.168	51.1036	1.15897	7.00981e-05	0.00188445	-	12	5775580	5776811	-	1001	-	- && - && -	-
Os12g0169600	362.604	573.445	507.757	1914.18	839.964	1323.19	481.269	1359.11	-1.49774	7.31333e-05	0.00195453	-	12	3542861	3544916	+	1546	-	- && Q40677.2 RecName: Full=Fructose-bisphosphate aldolase, chloroplastic; AltName: Full=Chloroplastic aldolase; Short=AldP; Flags: Precursor && PF00274:Fructose-bisphosphate aldolase class-I	-
Os01g0883000	10.2431	12.3322	9.30716	39.1848	49.4096	28.9069	10.6275	39.1671	-1.88076	7.53293e-05	0.00200232	OsRLCK50	1	38319060	38325583	+	2529	-	- && O04086.1 RecName: Full=Probable receptor-like protein kinase At1g11050; Flags: Precursor && PF07714:Protein tyrosine kinase	Pkinase_Tyr
Os04g0432100	58.3854	57.55	53.7747	10.7758	15.5011	29.8394	56.5701	18.7054	1.59156	7.57493e-05	0.00200946	-	4	21424187	21425721	-	1535	-	- && Q8S4W7.1 RecName: Full=DELLA protein GAI1; AltName: Full=Gibberellic acid-insensitive mutant protein 1; AltName: Full=VvGAI1 && PF03514:GRAS domain family	GRAS
Os08g0182400	56.3368	11.3045	22.7508	122.452	397.215	233.12	30.1307	250.929	-3.05783	7.75118e-05	0.00204149	-	8	4817967	4820693	+	850	-	- && - && -	-
novel.368	6.14584	6.16608	6.20477	26.4497	20.3451	44.7591	6.17223	30.518	-2.30744	7.75797e-05	0.00204149	-	12	6447244	6450872	-	3312	-	PF08263:Leucine rich repeat N-terminal domain|PF13855:Leucine rich repeat	LRRNT_2
Os07g0604700	142.379	131.543	81.6962	17.6331	69.7548	46.624	118.539	44.6707	1.40721	8.28308e-05	0.00214766	OsB12D1	7	24768075	24769065	+	607	-	- && - && PF06522:NADH-ubiquinone reductase complex 1 MLRQ subunit	-
Os10g0562900	54.2882	55.4947	47.5699	104.819	96.8816	113.763	52.4509	105.155	-1.00368	8.28853e-05	0.00214766	DERF12	10	22213939	22214320	+	382	-	- && - && -	-
Os12g0151000	26.632	26.7197	51.7064	5.87772	9.68816	9.32481	35.0194	8.2969	2.07537	8.84639e-05	0.00227831	OsPAP20b	12	2535927	2538830	+	1507	-	- && Q9LXI7.1 RecName: Full=Probable purple acid phosphatase 20; Flags: Precursor && PF14008:Iron/zinc purple acid phosphatase-like protein C|PF00149:Calcineurin-like phosphoesterase|PF16656:Purple acid Phosphatase, N-terminal domain	Metallophos
novel.424	10.2431	6.16608	13.4437	0	0	0	9.95094	0	5.8161	8.85052e-05	0.00227831	-	2	15026310	15029152	+	835	-	-	-
novel.63	20.4861	17.4706	14.4778	1.95924	1.93763	0	17.4782	1.29896	3.76598	9.11541e-05	0.00232374	-	1	4159021	4160097	-	773	-	-	-
novel.316	44.0452	58.5777	43.4334	20.572	14.5322	1.86496	48.6854	12.3231	1.98914	9.14561e-05	0.00232643	-	12	6638431	6643295	+	1893	-	-	-
Os12g0444800	40.9722	58.5777	52.7406	13.7147	15.5011	22.3795	50.7635	17.1984	1.55864	9.23432e-05	0.00234144	-	12	14974988	14977605	+	1153	-	- && P47917.1 RecName: Full=O-methyltransferase ZRP4; Short=OMT && PF00891:O-methyltransferase|PF08100:Dimerisation domain	-
Os03g0399000	1.02431	4.11072	3.10239	22.5312	20.3451	20.5146	2.7458	21.1303	-2.94475	9.54467e-05	0.00240723	OsPME12	3	16151375	16153554	+	2091	-	- && Q7Y201.2 RecName: Full=Probable pectinesterase/pectinesterase inhibitor 13; Includes: RecName: Full=Pectinesterase inhibitor 13; AltName: Full=Pectin methylesterase inhibitor 13; Includes: RecName: Full=Pectinesterase 13; Short=PE 13; AltName: Full=Pectin methylesterase 13; Short=AtPME13 && PF04043:Plant invertase/pectin methylesterase inhibitor|PF01095:Pectinesterase	-
Os03g0115800	671.945	346.328	176.836	66.6141	14.5322	9.32481	398.37	30.1571	3.72445	9.92076e-05	0.00248092	-	3	887193	888623	-	1431	-	- && - && -	-
Os01g0283600	61.4584	89.4081	101.345	38.2051	25.1892	42.8941	84.0704	35.4295	1.24531	0.000102123	0.00254576	OsCCR4	1	10144374	10146312	+	981	-	- && Q6K9A2.1 RecName: Full=Cinnamoyl-CoA reductase 1; Short=OsCCR1 && PF01370:NAD dependent epimerase/dehydratase family	Epimerase
Os03g0808000	49.1667	40.0795	65.1501	21.5516	16.4699	14.9197	51.4654	17.6471	1.54566	0.000102536	0.00255069	OsPGL11	3	33777471	33780350	+	1389	-	- && P35336.1 RecName: Full=Polygalacturonase; Short=PG; AltName: Full=Pectinase; Flags: Precursor [Actinidia deliciosa] && PF00295:Glycosyl hydrolases family 28	-
Os12g0133500	19.4618	32.8857	27.9215	8.81657	1.93763	3.72992	26.7563	4.82804	2.47482	0.000113211	0.00278403	OsCDPK26	12	1648260	1650685	+	1937	-	- && Q2QY37.1 RecName: Full=Calcium-dependent protein kinase 26; Short=OsCDPK26; Short=OsCPK26 && PF00069:Protein kinase domain|PF13499:EF-hand domain pair	Pkinase
Os11g0120200	50.191	34.9411	29.9897	4.8981	8.71935	15.8522	38.3739	9.82321	1.95994	0.000114847	0.00281548	-	11	889336	892204	-	2319	-	- && - && PF06075:Plant protein of unknown function (DUF936)	-
Os11g0291475	1.02431	4.11072	0	31.3478	1.93763	41.9616	1.71167	25.0824	-3.87271	0.000120929	0.00295235	-	11	10610057	10615844	+	2324	-	- && Q9SGZ5.2 RecName: Full=Probable beta-D-xylosidase 7; Short=AtBXL7; Flags: Precursor && -	-
Os07g0566150	54.2882	55.4947	38.2628	90.125	113.352	100.708	49.3486	101.395	-1.0387	0.00012286	0.00299023	-	7	22720629	22721233	-	605	-	- && - && -	-
novel.317	2.04861	0	0	19.5924	15.5011	16.7847	0.682871	17.2927	-4.65701	0.000122998	0.00299051	-	12	6767787	6770896	+	504	-	-	-
Os04g0681500	34.8264	77.076	69.2866	28.409	17.4387	15.8522	60.3963	20.5666	1.55616	0.000124411	0.00300633	-	4	34787366	34790215	+	1347	-	- && Q28BT4.1 RecName: Full=Calumenin; Flags: Precursor && PF13499:EF-hand domain pair	-
novel.315	24.5833	22.6089	32.058	3.91848	8.71935	0	26.4168	4.21261	2.65795	0.000125225	0.00301674	-	12	6610834	6613884	+	1058	-	-	-
novel.952	77.8473	136.681	140.642	35.2663	74.5989	45.6916	118.39	51.8522	1.19103	0.000125574	0.00302207	-	7	20598580	20600352	+	1773	-	PF07859:alpha/beta hydrolase fold	Abhydrolase_3
Os11g0224900	0	4.11072	3.10239	30.3682	6.78171	32.6368	2.40437	23.2622	-3.27643	0.000126364	0.00303801	Os11gRGA3	11	6532813	6535926	-	3114	-	- && Q6L3L0.1 RecName: Full=Putative late blight resistance protein homolog R1B-23 && PF00931:NB-ARC domain	NB-ARC
Os11g0517400	43.0209	40.0795	55.8429	11.7554	19.3763	14.9197	46.3144	15.3505	1.5927	0.000127874	0.00307119	-	11	18552567	18556300	-	1672	-	- && - && -	-
Os07g0558300	19.4618	18.4982	13.4437	56.8179	54.2537	38.2317	17.1346	49.7678	-1.53692	0.000132432	0.00316138	-	7	22309439	22313563	-	1523	-	- && Q9M0Y6.1 RecName: Full=Putative PAP-specific phosphatase, mitochondrial; AltName: Full=3'(2'),5'-bisphosphate nucleotidase; AltName: Full=3'(2'),5-bisphosphonucleoside 3'(2')-phosphohydrolase; AltName: Full=DPNPase; Flags: Precursor && PF00459:Inositol monophosphatase family	-
Os08g0557200	16.3889	14.3875	9.30716	54.8587	34.8774	40.0967	13.3612	43.2776	-1.69446	0.00013768	0.00326861	-	8	27884019	27885268	-	1250	-	- && Q8H5F8.1 RecName: Full=Manganese-dependent ADP-ribose/CDP-alcohol diphosphatase; AltName: Full=ADPRibase-Mn; AltName: Full=CDP-choline phosphohydrolase && PF00149:Calcineurin-like phosphoesterase	Metallophos
Os05g0181300	11.2674	6.16608	1.03413	27.4293	31.0021	32.6368	6.15586	30.3561	-2.30034	0.000142248	0.00335457	-	5	4895311	4895815	+	505	-	- && - && -	-
Os04g0458000	29.7049	18.4982	25.8532	5.87772	5.8129	0	24.6854	3.89687	2.67473	0.000144455	0.00339699	-	4	22881022	22881510	+	489	-	- && - && -	-
Os10g0180800	13.316	32.8857	28.9556	97.9619	42.6279	72.7335	25.0524	71.1078	-1.50523	0.000147575	0.00346004	WAK112	10	5539743	5544578	-	4753	-	- && Q9LMN7.1 RecName: Full=Wall-associated receptor kinase 5; Flags: Precursor && PF00069:Protein kinase domain|PF13947:Wall-associated receptor kinase galacturonan-binding	Pkinase
Os03g0775000	20.4861	20.5536	46.5358	105.799	77.5053	53.1514	29.1918	78.8185	-1.43263	0.000148444	0.00347696	-	3	32136863	32139508	-	1129	-	- && Q0RJF1.1 RecName: Full=Putative S-adenosyl-L-methionine-dependent methyltransferase FRAAL3718 && PF04072:Leucine carboxyl methyltransferase	-
Os09g0541000	56.3368	57.55	66.1842	146.943	126.915	86.7207	60.0237	120.193	-1.00077	0.000151656	0.00353559	OsPIP2	9	21310132	21311479	+	1247	-	- && Q651D5.2 RecName: Full=Probable aquaporin PIP2-7; AltName: Full=OsPIP2;7; AltName: Full=Plasma membrane intrinsic protein 2-7 && PF00230:Major intrinsic protein	-
Os02g0129300	24.5833	28.775	33.0921	59.7568	84.287	62.4762	28.8168	68.84	-1.2564	0.000151694	0.00353559	-	2	1532451	1535776	-	1561	-	- && - && -	-
Os12g0498500	25.6077	22.6089	26.8873	89.1453	44.5656	61.5437	25.0346	65.0849	-1.37794	0.000160738	0.00371346	-	12	18918241	18920690	-	948	-	- && Q84VQ4.1 RecName: Full=NAD(P)H-quinone oxidoreductase subunit U, chloroplastic; AltName: Full=NAD(P)H dehydrogenase subunit U; Short=NDH subunit U; AltName: Full=NADH-plastoquinone oxidoreductase subunit U; AltName: Full=Protein CHLORORESPIRATORY REDUCTION L; Flags: Precursor && PF00226:DnaJ domain	DnaJ
Os11g0270201	92.1875	73.9929	62.0477	44.0829	24.2204	27.9744	76.0761	32.0926	1.24686	0.000169831	0.00390447	-	11	9417345	9418117	-	773	-	- && - && -	-
Os07g0115200	2564.86	2282.48	478.802	125.391	17.4387	2.79744	1775.38	48.5425	5.19308	0.000172398	0.00395196	OsSTA185	7	834313	835728	-	1416	-	- && - && -	-
Os09g0551400	41.9965	40.0795	34.1262	9.79619	9.68816	15.8522	38.7341	11.7788	1.7142	0.0001749	0.00400155	-	9	21841355	21845258	+	2534	-	- && O81905.1 RecName: Full=Receptor-like serine/threonine-protein kinase SD1-8; AltName: Full=Arabidopsis thaliana receptor kinase 3; AltName: Full=S-domain-1 (SD1) receptor kinase 8; Short=SD1-8; Flags: Precursor && PF01453:D-mannose binding lectin|PF08276:PAN-like domain|PF07714:Protein tyrosine kinase|PF00954:S-locus glycoprotein domain	Pkinase_Tyr
Os01g0116900	38.9236	35.9688	33.0921	82.288	76.5365	73.666	35.9948	77.4968	-1.10592	0.000184632	0.00420793	-	1	924451	956639	+	1548	-	- && P93604.1 RecName: Full=Rust resistance kinase Lr10; AltName: Full=Probable receptor-like serine/threonine-protein kinase LRK10; Flags: Precursor && PF00069:Protein kinase domain	Pkinase
Os08g0106000	38.9236	33.9134	26.8873	82.288	85.2558	59.6788	33.2415	75.7409	-1.1869	0.000186725	0.00424746	-	8	308997	309927	+	786	-	- && Q43257.1 RecName: Full=indole-2-monooxygenase; AltName: Full=Cytochrome P450 71C4; AltName: Full=Protein benzoxazineless 2 && PF00067:Cytochrome P450	p450
Os12g0481400	13.316	12.3322	21.7167	0	1.93763	0	15.7883	0.645878	4.62212	0.000188873	0.00427986	-	12	17708000	17715334	-	4626	-	- && Q9LRR4.1 RecName: Full=Putative disease resistance RPP13-like protein 1 && PF00931:NB-ARC domain	NB-ARC
Os08g0281600	75.7986	72.9652	83.7644	20.572	23.2516	50.354	77.5094	31.3925	1.29984	0.000203273	0.00452809	OsFBX283	8	11035931	11037288	-	1134	-	- && Q9FF23.1 RecName: Full=Putative F-box protein At5g38390 && -	-
Os04g0689000	0	0	0	9.79619	10.657	6.52737	0	8.99351	-5.56988	0.000209286	0.0046432	prx64	4	35245424	35246736	-	1239	-	- && P84516.2 RecName: Full=Cationic peroxidase SPC4; Flags: Precursor && PF00141:Peroxidase	-
Os07g0242400	2.04861	3.08304	3.10239	54.8587	4.84408	15.8522	2.74468	25.185	-3.19691	0.000209422	0.0046432	OsFbox356	7	7938936	7941316	-	1645	-	- && Q3EBI7.1 RecName: Full=F-box protein At2g40910 && PF00646:F-box domain	F-box
Os12g0130200	48.1424	48.3009	59.9795	7.83695	24.2204	21.4471	52.1409	17.8348	1.5451	0.000219879	0.00483878	-	12	1457706	1459747	+	2042	-	- && P17801.2 RecName: Full=Putative receptor protein kinase ZmPK1; Flags: Precursor && PF00069:Protein kinase domain	Pkinase
Os03g0440200	0	1.02768	0	41.144	0.968816	9.32481	0.34256	17.1459	-5.53848	0.000221678	0.00487046	-	3	18603057	18608859	-	2649	-	- && B6SFA4.1 RecName: Full=Probable helicase MAGATAMA 3; AltName: Full=SEN1-like protein && PF13087:AAA domain|PF13086:AAA domain	-
Os11g0668100	0	0	0	67.5937	2.90645	64.3412	0	44.9471	-7.89204	0.000223594	0.00489711	-	11	26953151	26960443	-	2848	-	- && Q9LRR4.1 RecName: Full=Putative disease resistance RPP13-like protein 1 && -	-
Os01g0661601	38.9236	68.8545	67.2184	142.045	91.0687	123.087	58.3322	118.734	-1.02559	0.000237466	0.00514635	-	1	27013833	27014965	+	1133	-	- && - && PF07816:Protein of unknown function (DUF1645)	-
Os02g0112600	54.2882	36.9965	63.0818	24.4905	18.4075	11.1898	51.4555	18.0293	1.51627	0.00024174	0.00521316	NRT2.2	2	667264	669053	-	1790	-	- && P0DKG9.1 RecName: Full=High-affinity nitrate transporter 2.1; Short=OsNRT2.1 >P0DKH0.1 RecName: Full=High-affinity nitrate transporter 2.2; Short=OsNRT2.2 && PF07690:Major Facilitator Superfamily	MFS_1
Os06g0210400	20.4861	22.6089	14.4778	55.8383	43.5967	54.0839	19.191	51.173	-1.41471	0.00024263	0.00522758	-	6	5633354	5635721	-	2368	-	- && O80939.1 RecName: Full=L-type lectin-domain containing receptor kinase IV.1; Short=Arabidopsis thaliana lectin-receptor kinase e; Short=AthlecRK-e; Short=LecRK-IV.1; AltName: Full=Lectin Receptor Kinase 1; Flags: Precursor && PF00069:Protein kinase domain|PF00139:Legume lectin domain	Pkinase
Os02g0816300	35.8507	50.3563	46.5358	88.1657	55.2225	200.483	44.2476	114.624	-1.37466	0.000243273	0.00523669	-	2	34982175	34989869	+	3896	-	- && Q8RWY6.1 RecName: Full=CLIP-associated protein; Short=AtCLASP && PF12348:CLASP N terminal	-
Os12g0189700	48.1424	80.159	82.7303	186.128	90.0999	161.319	70.3439	145.849	-1.05227	0.000247344	0.00530982	-	12	4522509	4523612	+	1104	-	- && - && -	-
Os11g0649700	36.875	28.775	55.8429	148.902	61.0354	85.7882	40.4977	98.5753	-1.28311	0.000251602	0.00538169	-	11	25895922	25897219	-	866	-	- && Q2R0D1.1 RecName: Full=CASP-like protein 1U2; Short=OsCASPL1U2 && PF04535:Domain of unknown function (DUF588)	-
Os02g0571800	0	0	0	25.4701	5.8129	0.932481	0	10.7385	-5.82412	0.000259957	0.0055259	OsKS6	2	21886504	21897686	-	2466	-	- && A4KAG8.2 RecName: Full=Ent-isokaur-15-ene synthase; AltName: Full=Ent-kaurene synthase-like 5; Short=OsKS5; AltName: Full=Ent-kaurene synthase-like 6; Short=OsKS6; Short=OsKSL6; AltName: Full=Iso-kaurene synthase && PF03936:Terpene synthase family, metal binding domain|PF01397:Terpene synthase, N-terminal domain	-
Os12g0228400	33.8021	42.1349	33.0921	15.6739	7.75053	0	36.343	7.80815	2.22797	0.000260859	0.00553467	-	12	6976909	6982100	-	3510	-	- && Q43298.1 RecName: Full=Chaperonin CPN60-2, mitochondrial; AltName: Full=HSP60-2; Flags: Precursor && -	-
Os12g0510750	10.2431	14.3875	6.20477	28.409	31.9709	49.4215	10.2784	36.6005	-1.83307	0.000262154	0.00555218	-	12	19675656	19676282	-	627	-	- && - && -	-
Os04g0321500	32.7778	43.1625	31.0239	9.79619	7.75053	13.9872	35.6547	10.5113	1.75926	0.000263464	0.00557494	-	4	14804703	14805459	+	438	-	- && A3M899.1 RecName: Full=50S ribosomal protein L27 >B7GXH9.1 RecName: Full=50S ribosomal protein L27 >B7I6V8.1 RecName: Full=50S ribosomal protein L27 >B2HXU8.1 RecName: Full=50S ribosomal protein L27 >B0VSH6.1 RecName: Full=50S ribosomal protein L27 >B0VEJ5.1 RecName: Full=50S ribosomal protein L27 && PF01016:Ribosomal L27 protein	-
Os04g0379700	22.5347	41.1072	27.9215	79.3492	55.2225	81.1258	30.5211	71.8992	-1.23655	0.000268509	0.00566646	RVDE1	4	18551379	18552402	-	955	-	- && Q40593.1 RecName: Full=Violaxanthin de-epoxidase, chloroplastic; Flags: Precursor && PF07137:VDE lipocalin domain	-
Os01g0959900	39.9479	43.1625	39.2969	93.0638	77.5053	80.1934	40.8025	83.5875	-1.0343	0.000270359	0.00569535	-	1	42312149	42313573	+	1009	-	- && Q9S829.1 RecName: Full=NAD(P)H-quinone oxidoreductase subunit O, chloroplastic; AltName: Full=NAD(P)H dehydrogenase subunit O; Short=NDH subunit O; Short=NDH-O; AltName: Full=NADH-plastoquinone oxidoreductase subunit O; Flags: Precursor && -	-
novel.970	0	0	0	11.7554	8.71935	5.59489	0	8.68989	-5.5199	0.000277206	0.00580855	-	7	364356	365169	-	636	-	-	-
Os04g0364800	2.04861	0	0	67.5937	6.78171	40.0967	0.682871	38.1574	-5.80052	0.000278285	0.00581572	-	4	17560683	17561234	+	552	-	- && Q7XVA8.2 RecName: Full=Putative ripening-related protein 1; Flags: Precursor && -	-
Os04g0660900	43.0209	82.2144	104.447	19.5924	28.0957	41.0292	76.5607	29.5724	1.36953	0.000291122	0.00603176	-	4	33729812	33732506	+	2050	-	- && Q8RX77.1 RecName: Full=Protein NRT1/ PTR FAMILY 2.13; Short=AtNPF2.13; AltName: Full=Nitrate transporter 1.7 && PF00854:POT family	-
Os12g0541300	30.7292	7.19376	10.3413	0	1.93763	0.932481	16.0881	0.956705	4.06863	0.000291173	0.00603176	RBOHH	12	21648123	21653555	+	3189	-	- && Q948T9.1 RecName: Full=Respiratory burst oxidase homolog protein B; AltName: Full=NADPH oxidase RBOHB; AltName: Full=StRBOHB && PF08414:Respiratory burst NADPH oxidase|PF01794:Ferric reductase like transmembrane component|PF08022:FAD-binding domain|PF08030:Ferric reductase NAD binding domain	FAD_binding_8
Os08g0351300	5.12153	5.1384	7.2389	31.3478	26.158	20.5146	5.83294	26.0068	-2.1561	0.000292365	0.00605117	-	8	15987000	15991648	-	3535	-	- && - && -	-
Os01g0770700	17.4132	29.8027	41.3651	94.0434	59.0978	64.3412	29.527	72.4941	-1.29586	0.000307158	0.00628828	COPT1	1	32523314	32523953	+	640	-	- && Q94EE4.1 RecName: Full=Copper transporter 1; Short=OsCOPT1 && PF04145:Ctr copper transporter family	-
Os02g0178800	35.8507	31.8581	38.2628	293.886	140.478	65.2737	35.3238	166.546	-2.2369	0.000312973	0.00638487	OsGL1-2	2	4355073	4362388	-	2220	-	- && Q8H1Z0.1 RecName: Full=Protein ECERIFERUM 3; AltName: Full=Protein FACELESS POLLEN 1; AltName: Full=Protein WAX2; AltName: Full=Protein YORE-YORE && PF04116:Fatty acid hydroxylase superfamily|PF12076:WAX2 C-terminal domain	-
Os03g0764150	9.21875	26.7197	29.9897	2.93886	4.84408	2.79744	21.9761	3.52679	2.64075	0.000313346	0.00638487	-	3	31608650	31609860	+	1211	-	- && - && -	-
Os02g0187000	24.5833	39.0518	23.785	7.83695	8.71935	5.59489	29.14	7.38373	1.98298	0.000322937	0.00654085	-	2	4829205	4830333	+	1038	-	- && A6YIH8.1 RecName: Full=Premnaspirodiene oxygenase; Short=HPO; AltName: Full=Cytochrome P450 71D55 && PF00067:Cytochrome P450	p450
Os12g0480100	25.6077	27.7473	27.9215	62.6956	73.63	52.2189	27.0922	62.8482	-1.21341	0.000329349	0.00664471	-	12	17624501	17625313	+	580	-	- && O81208.1 RecName: Full=Light-harvesting complex-like protein OHP1, chloroplastic; AltName: Full=High-light-induced protein; Short=AtHLIP; AltName: Full=One helix protein; AltName: Full=One helix protein 1; AltName: Full=Protein PIGMENT DEFECTIVE 335; Flags: Precursor && -	-
Os10g0150700	3.07292	1.02768	1.03413	62.6956	10.657	0.932481	1.71158	24.7617	-3.85156	0.000329661	0.00664471	-	10	3020705	3022087	+	1031	-	- && - && PF01190:Pollen proteins Ole e I like	-
Os01g0974701	4.09722	2.05536	5.17064	30.3682	20.3451	14.9197	3.77441	21.8777	-2.53428	0.00032975	0.00664471	-	1	43071516	43072507	+	634	-	- && Q9SVM8.1 RecName: Full=Glycine-rich RNA-binding protein 2, mitochondrial; Short=AtGR-RBP2; AltName: Full=AtRBG2; AltName: Full=Glycine-rich protein 2; Short=AtGRP2; AltName: Full=Mitochondrial RNA-binding protein 1a; Short=At-mRBP1a; Flags: Precursor && PF00076:RNA recognition motif. (a.k.a. RRM, RBD, or RNP domain)	RRM_1
Os01g0662700	10.2431	14.3875	18.6143	41.144	31.0021	59.6788	14.415	43.9416	-1.60983	0.000333238	0.00669779	-	1	27050876	27054574	-	1464	-	- && Q8GYN9.2 RecName: Full=1,4-dihydroxy-2-naphthoyl-CoA synthase, peroxisomal; Short=DHNS; AltName: Full=Enoyl-CoA hydratase/isomerase D; Short=ECHID; AltName: Full=Naphthoate synthase && PF00378:Enoyl-CoA hydratase/isomerase	ECH
Os05g0337400	34.8264	53.4393	53.7747	108.738	70.7236	116.56	47.3468	98.6738	-1.06013	0.000336159	0.0067337	-	5	15770656	15773664	-	796	-	- && - && -	-
Os10g0150600	0	1.02768	0	108.738	19.3763	4.6624	0.34256	44.2588	-6.90763	0.000337472	0.00675429	-	10	3016889	3018047	+	1011	-	- && - && PF01190:Pollen proteins Ole e I like	-
Os03g0299700	538.785	532.338	546.02	32.3274	2.90645	0	539.048	11.7446	5.52161	0.000342573	0.0068275	-	3	10518913	10520192	+	1280	-	- && - && PF12620:Protein of unknown function (DUF3778)	-
Os10g0134033	16.3889	16.4429	10.3413	1.95924	0.968816	0	14.391	0.976018	3.90036	0.000352984	0.00701137	-	10	2118909	2123738	+	1446	-	- && - && -	-
Os02g0773200	63.507	78.1036	80.662	32.3274	38.7527	33.5693	74.0909	34.8831	1.08676	0.000354733	0.00703429	-	2	32643551	32644836	+	910	-	- && - && PF00582:Universal stress protein family	Usp
Os06g0531600	44.0452	52.4117	40.331	99.9212	99.7881	74.5985	45.5959	91.4359	-1.00295	0.000355204	0.00703774	OsGELP84	6	19838860	19842519	-	2212	-	- && Q9FJ45.1 RecName: Full=GDSL esterase/lipase At5g45910; AltName: Full=Extracellular lipase At5g45910; Flags: Precursor && PF00657:GDSL-like Lipase/Acylhydrolase	Lipase_GDSL
Os09g0116600	34.8264	44.1902	34.1262	76.4103	78.4741	79.2609	37.7143	78.0484	-1.04928	0.000364758	0.0071951	-	9	1317066	1317796	-	731	-	- && - && -	-
Os04g0354200	6.14584	12.3322	7.2389	30.3682	46.5032	21.4471	8.5723	32.7728	-1.9337	0.000369783	0.0072501	-	4	16919612	16923563	+	2373	-	- && Q9SZL8.1 RecName: Full=Protein FAR1-RELATED SEQUENCE 5 && PF03101:FAR1 DNA-binding domain|PF10551:MULE transposase domain	FAR1
Os06g0579200	29.7049	27.7473	47.5699	55.8383	92.0375	89.5182	35.0074	79.1313	-1.17771	0.000394532	0.00766293	OsLCT1	6	22566775	22571502	+	1536	-	- && - && -	-
Os01g0547600	10.2431	8.22144	21.7167	35.2663	46.5032	42.8941	13.3937	41.5545	-1.63466	0.000404767	0.00781043	NRT2.4	1	20385993	20388511	-	1768	-	- && A2ZU80.2 RecName: Full=Probable high-affinity nitrate transporter 2.4; Short=OsNRT2.4 && PF07690:Major Facilitator Superfamily	MFS_1
Os11g0208900	1.02431	0	0	78.3695	1.93763	59.6788	0.341435	46.662	-6.98424	0.000408258	0.00785855	-	11	5592564	5603077	-	3937	-	- && Q1MX30.1 RecName: Full=Receptor kinase-like protein Xa21; Contains: RecName: Full=Receptor kinase-like protein Xa21, processed; Flags: Precursor && PF13855:Leucine rich repeat|PF08263:Leucine rich repeat N-terminal domain|PF00069:Protein kinase domain	Pkinase
Os10g0555700	7.17014	5.1384	4.13651	45.0625	24.2204	12.1223	5.48168	27.135	-2.30476	0.000409097	0.0078683	OsEXPB2	10	21835933	21837651	-	1259	-	- && O24230.2 RecName: Full=Expansin-B2; AltName: Full=Beta-expansin-2; AltName: Full=OsEXPB2; AltName: Full=OsaEXPb1.9; Flags: Precursor && PF01357:Pollen allergen|PF03330:Rare lipoprotein A (RlpA)-like double-psi beta-barrel	-
Os04g0305700	20.4861	20.5536	11.3754	50.9402	43.5967	46.624	17.4717	47.0537	-1.42859	0.000414421	0.00795775	-	4	13771472	13773274	+	1803	-	- && Q9ZVX4.1 RecName: Full=UDP-glycosyltransferase 90A1 && PF00201:UDP-glucoronosyl and UDP-glucosyl transferase	UDPGT
Os04g0514150	146.476	135.654	138.573	29.3886	95.9128	74.5985	140.234	66.6333	1.07247	0.000422046	0.00807141	-	4	25681530	25687116	+	5587	-	- && Q7XSK0.2 RecName: Full=Beta-glucosidase 18; Short=Os4bglu18; Flags: Precursor && PF00232:Glycosyl hydrolase family 1	Glyco_hydro_1
Os06g0142350	37.8993	14.3875	6.20477	1.95924	0.968816	3.72992	19.4972	2.21933	3.12811	0.000427899	0.00817606	UDP-GT	6	2208762	2209556	-	681	-	- && Q02921.1 RecName: Full=Early nodulin-93; Short=N-93 && PF03386:Early nodulin 93 ENOD93 protein	-
Os01g0862200	30.7292	18.4982	37.2286	73.4714	59.0978	67.1386	28.8187	66.5693	-1.20806	0.000433067	0.00822897	-	1	37315305	37316250	+	855	-	- && - && -	-
Os07g0218200	16.3889	13.3598	34.1262	6.85733	0.968816	1.86496	21.2917	3.23037	2.72755	0.000436195	0.00827511	TPS3	7	6516015	6522044	-	1623	-	- && B1B1U3.1 RecName: Full=Alpha-humulene synthase && PF01397:Terpene synthase, N-terminal domain|PF03936:Terpene synthase family, metal binding domain	-
Os12g0577600	51.2153	34.9411	41.3651	90.125	84.287	81.1258	42.5072	85.1793	-1.00239	0.000442833	0.00836815	-	12	23879858	23884977	+	2741	-	- && - && PF07059:Protein of unknown function (DUF1336)	-
Os07g0587300	80.9202	101.74	85.8327	26.4497	48.4408	53.1514	89.4977	42.6806	1.06623	0.000451589	0.00849944	-	7	23902874	23903531	-	658	-	- && - && -	-
Os01g0881300	47.1181	64.7438	34.1262	106.778	78.4741	112.83	48.6627	99.3609	-1.02995	0.000451612	0.00849944	OsSWEET1a	1	38254053	38257595	+	1577	-	- && Q8RZQ8.1 RecName: Full=Bidirectional sugar transporter SWEET1a; Short=OsSWEET1a && PF03083:Sugar efflux transporter for intercellular exchange	-
Os12g0209901	522.396	487.12	519.133	222.374	256.736	96.0455	509.55	191.718	1.41065	0.00050215	0.00927351	-	12	5749555	5750951	-	1397	-	- && Q7XA39.1 RecName: Full=Putative disease resistance protein RGA4; AltName: Full=RGA4-blb && PF00931:NB-ARC domain	NB-ARC
Os10g0148100	0	0	0	23.5109	2.90645	1.86496	0	9.42742	-5.63626	0.000503554	0.00929219	-	10	2897688	2899059	-	1082	-	- && Q9T0I5.1 RecName: Full=Proline-rich protein 4; Short=AtPRP4; Flags: Precursor && PF01190:Pollen proteins Ole e I like	-
Os11g0226201	37.8993	39.0518	51.7064	132.249	44.5656	126.817	42.8859	101.211	-1.23931	0.000517394	0.00951566	-	11	6599802	6601409	+	1071	-	- && Q9LDQ3.3 RecName: Full=Putative cysteine-rich receptor-like protein kinase 35; Short=Cysteine-rich RLK35; Flags: Precursor && PF00069:Protein kinase domain	Pkinase
Os03g0196400	79.8959	45.2179	56.8771	185.148	88.1623	105.37	60.6636	126.227	-1.05628	0.000528469	0.00968374	-	3	5034168	5040417	+	1217	-	- && Q10QH3.2 RecName: Full=CASP-like protein Os03g0196400 && PF04535:Domain of unknown function (DUF588)	-
Os06g0351500	4.09722	4.11072	2.06826	35.2663	12.5946	14.9197	3.4254	20.9269	-2.60871	0.000532368	0.00974032	OsGELP83	6	14281547	14290711	+	1206	-	- && Q94CH8.1 RecName: Full=GDSL esterase/lipase EXL1; AltName: Full=Family II extracellular lipase 1; Short=Family II lipase EXL1; Flags: Precursor && PF00657:GDSL-like Lipase/Acylhydrolase	Lipase_GDSL
Os12g0209200	37.8993	28.775	55.8429	16.6535	10.657	13.9872	40.8391	13.7659	1.56894	0.000544233	0.00988857	OsBBX30	12	5699790	5702413	+	792	-	- && Q9SYM2.2 RecName: Full=B-box zinc finger protein 22; AltName: Full=Protein DOUBLE B-BOX 3; AltName: Full=Protein LIGHT-REGULATED ZINC FINGER PROTEIN 1; AltName: Full=Protein SALT TOLERANCE HOMOLOG 3 && PF00643:B-box zinc finger	zf-B_box
Os06g0253350	66.5799	60.6331	93.0716	33.3071	27.1269	41.0292	73.4282	33.821	1.11685	0.000562759	0.0101709	-	6	7954357	7958130	+	979	-	- && O80939.1 RecName: Full=L-type lectin-domain containing receptor kinase IV.1; Short=Arabidopsis thaliana lectin-receptor kinase e; Short=AthlecRK-e; Short=LecRK-IV.1; AltName: Full=Lectin Receptor Kinase 1; Flags: Precursor && PF00069:Protein kinase domain	Pkinase
Os03g0725200	27.6563	31.8581	23.785	0	11.6258	5.59489	27.7664	5.74023	2.27207	0.000568177	0.0102449	-	3	29479234	29479879	+	646	-	- && - && -	-
Os10g0530500	36.875	34.9411	36.1945	99.9212	62.0042	66.2061	36.0035	76.0438	-1.07789	0.000651852	0.0115248	OsGSTU13	10	20622453	20623389	-	844	-	- && Q06398.2 RecName: Full=Probable glutathione S-transferase GSTU6; AltName: Full=28 kDa cold-induced protein && PF02798:Glutathione S-transferase, N-terminal domain|PF00043:Glutathione S-transferase, C-terminal domain	GST_N
Os07g0626800	1.02431	3.08304	3.10239	30.3682	6.78171	17.7171	2.40324	18.289	-2.92835	0.000696653	0.0121899	-	7	25966100	25967412	-	1313	-	- && - && PF01593:Flavin containing amine oxidoreductase	Amino_oxidase
Os08g0545700	24.5833	21.5813	28.9556	77.3899	46.5032	52.2189	25.0401	58.704	-1.22868	0.000732624	0.0127345	-	8	27329441	27331356	+	1242	-	- && - && PF01963:TraB family	-
Os11g0235700	0	0	2.06826	21.5516	0.968816	26.1095	0.689419	16.21	-4.56187	0.000737584	0.0128019	-	11	7221675	7228567	+	375	-	- && - && -	-
novel.1004	27.6563	35.9688	51.7064	10.7758	19.3763	6.52737	38.4438	12.2265	1.65556	0.000804818	0.0137669	-	7	20596629	20600352	-	3055	-	PF07859:alpha/beta hydrolase fold	Abhydrolase_3
Os11g0664800	1.02431	0	0	73.4714	1.93763	27.9744	0.341435	34.4612	-6.5468	0.000829188	0.0140819	-	11	26794437	26799952	+	1632	-	- && F4JR57.1 RecName: Full=Calmodulin-binding protein 60 F && PF07887:Calmodulin binding protein-like	-
Os12g0240000	92.1875	88.3804	71.3549	16.6535	16.4699	0.932481	83.9743	11.352	2.88986	0.000832015	0.0141198	-	12	7748252	7749234	-	983	-	- && Q2QV81.3 RecName: Full=ABC transporter G family member 49; Short=OsABCG49; AltName: Full=Pleiotropic drug resistance protein 22; Short=OsPDR22 && -	-
Os04g0424200	2.04861	4.11072	1.03413	48.0013	3.87527	11.1898	2.39782	21.0221	-3.12974	0.000840471	0.0142429	-	4	20966881	20972795	+	2769	-	- && B6SFA4.1 RecName: Full=Probable helicase MAGATAMA 3; AltName: Full=SEN1-like protein && PF13087:AAA domain|PF13086:AAA domain	-
novel.364	10.2431	11.3045	13.4437	23.5109	44.5656	38.2317	11.6637	35.436	-1.60412	0.000892276	0.0149919	-	12	5503987	5506021	-	2035	-	PF00931:NB-ARC domain	NB-ARC
novel.767	27.6563	17.4706	15.5119	0	3.87527	6.52737	20.2129	3.46754	2.53239	0.000895137	0.0150293	-	5	29427670	29428590	+	921	-	PF05699:hAT family C-terminal dimerisation region	hATC
Os01g0803300	35.8507	29.8027	33.0921	83.2676	71.6924	53.1514	32.9152	69.3705	-1.07442	0.000912184	0.015283	-	1	34043179	34044975	-	1308	-	- && Q9FL41.1 RecName: Full=WAT1-related protein At5g07050 && PF00892:EamA-like transporter family	DUF6
Os11g0591200	56.3368	39.0518	28.9556	96.9823	77.5053	77.3959	41.4481	83.9612	-1.01751	0.000947802	0.015757	-	11	22468348	22471203	-	1523	-	- && Q9FG87.1 RecName: Full=3-ketoacyl-CoA synthase 20; Short=KCS-20; AltName: Full=Very long-chain fatty acid condensing enzyme 20; Short=VLCFA condensing enzyme 20 && PF08541:3-Oxoacyl-[acyl-carrier-protein (ACP)] synthase III C terminal|PF08392:FAE1/Type III polyketide synthase-like protein	-
Os03g0830600	62.4827	40.0795	46.5358	14.6943	26.158	19.5821	49.6993	20.1448	1.30259	0.000989677	0.0164185	-	3	34891223	34892049	-	827	-	- && - && PF04043:Plant invertase/pectin methylesterase inhibitor	-
Os01g0798500	21.5104	30.8304	48.604	83.2676	65.8795	69.0036	33.6483	72.7169	-1.11209	0.00100777	0.0166602	-	1	33803155	33805386	+	1120	-	- && Q5VQK9.1 RecName: Full=Protein CHLOROPLAST ENHANCING STRESS TOLERANCE, chloroplastic; Short=OsCEST; Flags: Precursor && -	-
Os07g0120500	15.3646	32.8857	20.6826	2.93886	8.71935	3.72992	22.9776	5.12938	2.16466	0.00104546	0.0172112	OsEnS-91	7	1089664	1090092	-	429	-	- && - && PF04398:Protein of unknown function, DUF538	-
Os03g0283200	3.07292	4.11072	4.13651	26.4497	19.3763	12.1223	3.77338	19.3161	-2.35454	0.00110734	0.0180789	OsGSTL1	3	9717253	9719884	-	1045	-	- && Q10N44.1 RecName: Full=Protein IN2-1 homolog A && PF13410:Glutathione S-transferase, C-terminal domain|PF13417:Glutathione S-transferase, N-terminal domain	-
Os12g0218100	15.3646	21.5813	23.785	41.144	44.5656	61.5437	20.2436	49.0844	-1.27929	0.00111414	0.0181706	-	12	6301536	6302135	-	600	-	- && - && -	-
Os04g0628900	45.0695	48.3009	34.1262	129.31	50.3784	94.1806	42.4989	91.2896	-1.10261	0.00114274	0.0185432	CycU1	4	31995412	31998252	+	795	-	- && Q0J9W0.2 RecName: Full=Cyclin-P1-1; Short=CycP1;1 && PF08613:Cyclin	-
Os08g0293100	11.2674	12.3322	3.10239	22.5312	29.0645	41.9616	8.90064	31.1858	-1.8092	0.0011572	0.0187122	-	8	11773736	11774515	-	780	-	- && - && -	-
Os10g0377300	0	5.1384	0	9.79619	10.657	28.9069	1.7128	16.4534	-3.26512	0.00118938	0.0191149	Oshox8	10	12041604	12043091	+	1296	-	- && Q338Z7.1 RecName: Full=Homeobox-leucine zipper protein HOX8; AltName: Full=HD-ZIP protein HOX8; AltName: Full=Homeodomain transcription factor HOX8; AltName: Full=OsHox8 && PF00046:Homeobox domain|PF02183:Homeobox associated leucine zipper	Homeobox
Os05g0555600	40.9722	22.6089	24.8191	72.4918	54.2537	65.2737	29.4668	64.0064	-1.11866	0.00125003	0.0199407	OsGLT2	5	27631211	27636450	+	2257	-	- && Q0DG35.2 RecName: Full=Glutamate synthase 2 [NADH], chloroplastic; AltName: Full=NADH-dependent glutamate synthase 2; Short=NADH-GOGAT 2; Flags: Precursor && PF14691:Dihydroprymidine dehydrogenase domain II, 4Fe-4S cluster|PF07992:Pyridine nucleotide-disulphide oxidoreductase	Pyr_redox_2
Os02g0102300	22.5347	14.3875	14.4778	48.981	34.8774	46.624	17.1333	43.4941	-1.34374	0.00126268	0.020112	STR5	2	124645	127131	+	863	-	- && Q8RUD6.1 RecName: Full=Rhodanese-like domain-containing protein 19, mitochondrial; AltName: Full=Sulfurtransferase 19; Short=AtStr19; Flags: Precursor && PF00581:Rhodanese-like domain	Rhodanese
Os05g0572700	27.6563	21.5813	23.785	8.81657	2.90645	7.45985	24.3408	6.39429	1.92808	0.00127878	0.0203307	OsPP2C51	5	28523815	28526025	-	1661	-	- && Q65XK7.1 RecName: Full=Probable protein phosphatase 2C 51; Short=OsPP2C51 && PF00481:Protein phosphatase 2C	PP2C
novel.885	50.191	72.9652	50.6723	27.4293	32.9398	13.0547	57.9428	24.4746	1.24642	0.0012828	0.0203481	-	6	11140293	11140803	-	371	-	-	-
Os09g0549300	12.2917	15.4152	15.5119	57.7975	27.1269	35.4343	14.4063	40.1196	-1.47695	0.00128476	0.0203481	-	9	21724337	21726166	-	1600	-	- && Q9LMA1.1 RecName: Full=Probable flavin-containing monooxygenase 1 && PF00743:Flavin-binding monooxygenase-like	FMO-like
Os02g0667500	3.07292	10.2768	10.3413	37.2255	19.3763	28.9069	7.897	28.5029	-1.85235	0.00131222	0.0206955	-	2	27103466	27105886	+	1834	-	- && A4IF94.1 RecName: Full=Hippocampus abundant transcript-like protein 1; AltName: Full=Major facilitator superfamily domain-containing 14B && -	-
Os08g0143150	29.7049	33.9134	33.0921	6.85733	13.5634	12.1223	32.2368	10.8477	1.56946	0.00132055	0.0207576	-	8	2373797	2374447	-	651	-	- && - && -	-
Os04g0447800	7.17014	20.5536	18.6143	57.7975	33.9086	37.2992	15.446	43.0018	-1.47699	0.00132744	0.0208382	OsGAD2	4	22330191	22332343	+	1753	-	- && Q9ZPS3.1 RecName: Full=Glutamate decarboxylase 4; Short=GAD 4 && PF00282:Pyridoxal-dependent decarboxylase conserved domain	-
Os07g0131001	61.4584	72.9652	61.0136	34.2867	35.8462	25.177	65.1457	31.77	1.03758	0.00133449	0.0209211	-	7	1626738	1628731	+	1994	-	- && O80939.1 RecName: Full=L-type lectin-domain containing receptor kinase IV.1; Short=Arabidopsis thaliana lectin-receptor kinase e; Short=AthlecRK-e; Short=LecRK-IV.1; AltName: Full=Lectin Receptor Kinase 1; Flags: Precursor && PF00069:Protein kinase domain|PF00139:Legume lectin domain	Pkinase
Os05g0202800	141.354	256.92	284.385	541.729	375.901	681.644	227.553	533.091	-1.22832	0.0013602	0.0212118	MTd	5	6393899	6396069	+	667	-	- && A3B0Y1.1 RecName: Full=Metallothionein-like protein 3B; AltName: Full=Class I metallothionein-like protein 3B; AltName: Full=OsMT-I-3b && -	-
Os09g0522200	5.12153	10.2768	11.3754	15.6739	39.7215	37.2992	8.92458	30.8982	-1.7934	0.0013705	0.0213583	OsDREB1A	9	20403413	20404332	-	920	-	- && A2Z389.1 RecName: Full=Dehydration-responsive element-binding protein 1A; Short=Protein DREB1A; AltName: Full=Protein C-repeat-binding factor 3; Short=rCBF3 && PF00847:AP2 domain	AP2
Os12g0571000	33.8021	31.8581	43.4334	10.7758	13.5634	15.8522	36.3645	13.3971	1.43857	0.00140484	0.0217539	OsMT1g	12	23512501	23513406	+	502	-	- && Q2QNC3.1 RecName: Full=Metallothionein-like protein 4C; AltName: Full=Class I metallothionein-like protein 4C; AltName: Full=MT-1-4b; AltName: Full=OsMT-I-4c; AltName: Full=OsMT1c && -	-
Os10g0108700	2.04861	1.02768	1.03413	15.6739	10.657	12.1223	1.37014	12.8177	-3.22427	0.00144256	0.0222323	OsAT15	10	583024	584657	+	1512	-	- && Q7XHC4.1 RecName: Full=Acyl transferase 15; Short=OsAT15 && PF02458:Transferase family	-
Os10g0556100	19.4618	20.5536	16.5461	76.4103	32.9398	37.2992	18.8538	48.8831	-1.37309	0.00146894	0.0225362	OsEXPB4	10	21858853	21861259	+	2406	-	- && Q94LR4.1 RecName: Full=Expansin-B4; AltName: Full=Beta-expansin-4; AltName: Full=OsEXPB4; AltName: Full=OsaEXPb1.7; Flags: Precursor && PF03330:Rare lipoprotein A (RlpA)-like double-psi beta-barrel|PF01357:Pollen allergen	-
Os12g0115050	193.594	191.148	187.177	699.448	411.747	264.825	190.64	458.673	-1.26642	0.00148562	0.022733	OsLTP1.17	12	733811	734096	+	286	-	- && - && -	-
Os03g0226400	25.6077	6.16608	15.5119	61.716	38.7527	34.5018	15.7619	44.9902	-1.51186	0.00149512	0.0228085	OsMTP8.1	3	6636675	6641550	+	2104	-	- && Q10PP8.1 RecName: Full=Metal tolerance protein 4; Short=OsMTP4 && PF16916:Dimerisation domain of Zinc Transporter|PF01545:Cation efflux family	-
Os08g0402500	20.4861	32.8857	20.6826	69.553	39.7215	60.6113	24.6848	56.6286	-1.19784	0.00151296	0.0230322	-	8	19206651	19207802	+	900	-	- && - && PF05553:Cotton fibre expressed protein	-
Os08g0441100	81.9445	47.2733	50.6723	29.3886	22.2828	29.8394	59.9633	27.1702	1.1418	0.00153606	0.0233389	OsCIPK06	8	21467453	21468593	+	1141	-	- && Q6Z9F4.1 RecName: Full=CBL-interacting protein kinase 6; AltName: Full=OsCIPK06 && PF03822:NAF domain|PF00069:Protein kinase domain	Pkinase
Os08g0536350	1.02431	4.11072	4.13651	23.5109	9.68816	19.5821	3.09051	17.5937	-2.51035	0.00154685	0.0233948	-	8	26807207	26808282	+	1076	-	- && - && -	-
Os01g0108500	10.2431	9.24912	3.10239	13.7147	47.472	242.445	7.53152	101.211	-3.74828	0.00154694	0.0233948	-	1	460177	461371	+	1195	-	- && - && PF12620:Protein of unknown function (DUF3778)	-
Os05g0369900	54.2882	39.0518	53.7747	13.7147	24.2204	24.2445	49.0382	20.7265	1.24056	0.00155686	0.0235039	OsEXO70FX1	5	17779880	17781705	+	1627	-	- && - && PF03081:Exo70 exocyst complex subunit	Exo70
Os04g0644400	5.12153	2.05536	2.06826	144.984	13.5634	9.32481	3.08172	55.9573	-4.18167	0.00158121	0.0237653	-	4	32792893	32794163	-	1271	-	- && P14009.1 RecName: Full=14 kDa proline-rich protein DC2.15; Flags: Precursor && -	-
Os08g0240000	4.09722	9.24912	12.4095	24.4905	22.2828	41.0292	8.58529	29.2675	-1.77179	0.00158632	0.0238119	-	8	8472521	8475589	-	1234	-	- && P52836.2 RecName: Full=Flavonol 3-sulfotransferase; Short=F3-ST && PF00685:Sulfotransferase domain	Sulfotransfer_1
Os09g0488600	28.6806	17.4706	26.8873	5.87772	4.84408	9.32481	24.3462	6.6822	1.86155	0.00163868	0.0244563	-	9	18845059	18847236	+	1400	-	- && - && -	-
Os01g0647200	81.9445	12.3322	2.06826	0	0.968816	0.932481	32.115	0.633766	5.65641	0.00172905	0.0255971	-	1	26086062	26088337	-	2276	-	- && - && -	-
Os07g0628700	32.7778	41.1072	38.2628	81.3084	94.944	50.354	37.3826	75.5355	-1.01367	0.00183456	0.0268566	-	7	26052222	26055831	-	2365	-	- && Q0D5R3.1 RecName: Full=Cysteine-rich receptor-like protein kinase 6; Short=Cysteine-rich RLK6; Flags: Precursor && PF07714:Protein tyrosine kinase|PF01657:Salt stress response/antifungal	Pkinase_Tyr
Os12g0194900	28.6806	39.0518	21.7167	77.3899	53.2849	58.7463	29.8164	63.1404	-1.0817	0.00185637	0.0271124	OsAAP10B	12	4881038	4884876	+	1817	-	- && P92934.1 RecName: Full=Amino acid permease 6; AltName: Full=Amino acid transporter AAP6 && PF01490:Transmembrane amino acid transporter protein	Aa_trans
Os03g0355200	2.04861	6.16608	7.2389	3.91848	29.0645	46.624	5.1512	26.5357	-2.3678	0.00188314	0.0274489	OsWD40-72	3	13570909	13574657	+	1688	-	- && O22212.1 RecName: Full=U4/U6 small nuclear ribonucleoprotein PRP4-like protein; AltName: Full=Protein EMBRYO DEFECTIVE 2776; AltName: Full=Protein LACHESIS && PF08799:pre-mRNA processing factor 4 (PRP4) like|PF00400:WD domain, G-beta repeat	WD40
Os01g0265000	12.2917	20.5536	33.0921	44.0829	47.472	66.2061	21.9791	52.587	-1.26032	0.00194277	0.0281618	OsGGR2	1	9018144	9019762	+	1619	-	- && Q9ZS34.1 RecName: Full=Geranylgeranyl diphosphate reductase, chloroplastic; AltName: Full=Geranylgeranyl reductase; Flags: Precursor && -	-
Os01g0869750	25.6077	5.1384	5.17064	1.95924	0	0	11.9722	0.653079	4.21817	0.00195278	0.0282723	-	1	37695077	37696475	-	519	-	- && - && -	-
Os02g0588600	8.19445	5.1384	3.10239	25.4701	24.2204	15.8522	5.47841	21.8476	-1.99344	0.00195566	0.0282966	-	2	22692610	22694029	+	977	-	- && - && -	-
Os08g0293300	92.1875	66.7992	76.5255	1.95924	0	13.9872	78.5041	5.31548	3.87961	0.00202867	0.0292279	-	8	11785529	11798215	-	3384	-	- && Q9STE7.1 RecName: Full=Putative disease resistance RPP13-like protein 3 && PF00931:NB-ARC domain	NB-ARC
Os06g0529900	2.04861	5.1384	1.03413	2.93886	4.84408	60.6113	2.74038	22.7981	-3.05852	0.00209119	0.0300201	-	6	19701309	19702347	+	1024	-	- && - && -	-
Os02g0240100	29.7049	56.5224	35.1604	332.091	124.977	72.7335	40.4625	176.601	-2.12558	0.0021384	0.0306223	prx30	2	7938411	7939811	+	1326	-	- && A5H452.1 RecName: Full=Peroxidase 70; AltName: Full=Plasma membrane-bound peroxidase 2b; Short=pmPOX2b; Flags: Precursor && PF00141:Peroxidase	-
Os10g0504900	390.261	208.619	346.433	170.454	62.0042	108.168	315.104	113.542	1.47278	0.00215317	0.0307966	OsLTP2.9	10	19303783	19304325	+	486	-	- && A2XBN5.2 RecName: Full=Non-specific lipid-transfer protein 2; Short=nsLTP2; AltName: Full=7 kDa lipid transfer protein; Flags: Precursor && -	-
Os02g0568700	68.6285	43.1625	64.116	34.2867	19.3763	27.9744	58.6357	27.2125	1.10781	0.00220939	0.0314978	OsTPS5	2	21627356	21642080	-	1545	-	- && Q0JA81.2 RecName: Full=Ent-kaurene synthase-like 2; Short=OsKSL2 && PF03936:Terpene synthase family, metal binding domain|PF01397:Terpene synthase, N-terminal domain	-
Os03g0111200	13.316	16.4429	16.5461	47.0217	39.7215	29.8394	15.435	38.8609	-1.33115	0.00221019	0.0314978	OsREM1.3	3	647000	649463	-	1031	-	- && - && PF03763:Remorin, C-terminal region|PF03766:Remorin, N-terminal region	-
Os01g0362100	20.4861	34.9411	29.9897	49.9606	59.0978	69.9361	28.4723	59.6648	-1.06837	0.00224581	0.0319286	-	1	14754835	14764507	-	2482	-	- && Q9ZVN2.1 RecName: Full=Acyltransferase-like protein At1g54570, chloroplastic; Flags: Precursor && PF12146:Serine aminopeptidase, S33	-
Os03g0708000	7.17014	7.19376	18.6143	40.1644	62.0042	12.1223	10.9927	38.097	-1.7925	0.00225165	0.0319731	-	3	28548351	28549923	+	1253	-	- && Q10E50.1 RecName: Full=Phospholipase A2 homolog 3; Flags: Precursor && -	-
Os06g0553200	2.04861	2.05536	0	40.1644	5.8129	1.86496	1.36799	15.9474	-3.5387	0.00233156	0.0328125	PFL	6	21006766	21008156	-	977	-	- && - && -	-
Os04g0353600	1.02431	1.02768	0	14.6943	1.93763	18.6496	0.683995	11.7605	-4.10226	0.00238706	0.033474	OsRALF-2	4	16882610	16890074	+	1754	-	- && Q39152.1 RecName: Full=Fatty acyl-CoA reductase 1 && PF07993:Male sterility protein|PF03015:Male sterility protein	NAD_binding_4
Os10g0523201	10.2431	10.2768	9.30716	33.3071	28.0957	25.177	9.94234	28.8599	-1.5366	0.00246348	0.0344029	-	10	20307523	20308904	-	1382	-	- && O82752.1 RecName: Full=Protein DETOXIFICATION 49; Short=AtDTX49; AltName: Full=Multidrug and toxic compound extrusion protein 49; Short=MATE protein 49; AltName: Full=Protein NOVEL ION CARRIER 1; Short=Protein NIC1 && PF01554:MatE	MatE
Os06g0191500	11.2674	18.4982	14.4778	2.93886	3.87527	0.932481	14.7478	2.5822	2.52092	0.00251934	0.0349355	-	6	4624188	4625199	+	1012	-	- && Q8RXG3.2 RecName: Full=Mitogen-activated protein kinase kinase 5; Short=AtMAP2Kalpha; Short=AtMEK5; Short=AtMKK5; Short=MAP kinase kinase 5 && PF00069:Protein kinase domain	Pkinase
Os12g0221700	20.4861	9.24912	20.6826	4.8981	3.87527	0.932481	16.8059	3.23528	2.38527	0.00254562	0.0351762	-	12	6585435	6586455	+	1021	-	- && - && PF13855:Leucine rich repeat	-
Os04g0415600	14.3403	5.1384	1.03413	49.9606	19.3763	16.7847	6.8376	28.7072	-2.06684	0.00255032	0.0352206	COPT4	4	20533890	20534645	+	756	-	- && Q7XTF8.1 RecName: Full=Copper transporter 6; Short=OsCOPT6 && PF04145:Ctr copper transporter family	-
Os02g0678200	27.6563	20.5536	22.7508	81.3084	37.7838	43.8266	23.6536	54.3063	-1.19784	0.00259376	0.035654	OsSPX-MFS2	2	27696289	27702009	+	2780	-	- && Q6EPQ3.1 RecName: Full=SPX domain-containing membrane protein Os02g45520 >A2X8A7.2 RecName: Full=SPX domain-containing membrane protein OsI_08463 && PF03105:SPX domain|PF07690:Major Facilitator Superfamily	MFS_1
Os10g0133600	10.2431	6.16608	10.3413	26.4497	31.9709	23.312	8.91681	27.2442	-1.61094	0.00260087	0.035731	-	10	2099188	2099823	-	636	-	- && - && -	-
Os01g0592500	19.4618	26.7197	34.1262	6.85733	8.71935	10.2573	26.7692	8.61132	1.63394	0.00264209	0.0362131	OsAGP15	1	23167795	23168478	-	684	-	- && - && -	-
Os07g0434700	19.4618	49.3286	20.6826	123.432	35.8462	64.3412	29.8243	74.5398	-1.32083	0.00265745	0.0364026	-	7	14520218	14524575	-	3664	-	- && Q9FV52.2 RecName: Full=Methionine aminopeptidase 1B, chloroplastic; Short=MAP 1B; Short=MetAP 1B; AltName: Full=Peptidase M 1B; Flags: Precursor && -	-
Os12g0120000	22.5347	20.5536	33.0921	6.85733	7.75053	9.32481	25.3935	7.97756	1.66844	0.00271799	0.0370389	-	12	947150	950199	-	2500	-	- && - && PF06075:Plant protein of unknown function (DUF936)	-
Os07g0175300	14.3403	39.0518	14.4778	67.5937	55.2225	41.0292	22.6233	54.6151	-1.27044	0.00272624	0.0370927	-	7	3957966	3960638	-	2673	-	- && - && -	-
Os09g0327100	37.8993	28.775	39.2969	19.5924	3.87527	13.0547	35.3237	12.1741	1.53749	0.0027387	0.0372353	OsRab11C2	9	9643566	9645793	-	1199	-	- && Q9FJH0.1 RecName: Full=Ras-related protein RABA1f; Short=AtRABA1f && PF00071:Ras family	Ras
Os10g0404900	4.09722	3.08304	4.13651	16.6535	17.4387	16.7847	3.77226	16.959	-2.16861	0.00274927	0.0373575	Oshox23	10	13804909	13806731	+	1605	-	- && Q94GL5.1 RecName: Full=Homeobox-leucine zipper protein HOX23; AltName: Full=HD-ZIP protein HOX23; AltName: Full=Homeodomain transcription factor HOX23; AltName: Full=OsHox23 >A2Z734.1 RecName: Full=Homeobox-leucine zipper protein HOX23; AltName: Full=HD-ZIP protein HOX23; AltName: Full=Homeodomain transcription factor HOX23; AltName: Full=OsHox23 && PF00046:Homeobox domain|PF02183:Homeobox a…	Homeobox
Os02g0729500	0	1.02768	1.03413	17.6331	8.71935	5.59489	0.687269	10.6491	-3.95409	0.00278707	0.037698	-	2	30364802	30365092	+	291	-	- && - && -	-
Os01g0254850	9.21875	7.19376	12.4095	40.1644	29.0645	18.6496	9.60735	29.2928	-1.60709	0.00280649	0.0379172	-	1	8471334	8472108	-	775	-	- && - && -	-
Os11g0559200	33.8021	19.5259	33.0921	58.7772	74.5989	47.5565	28.8067	60.3108	-1.06535	0.00281405	0.0379977	Xa21*	11	20802978	20806262	+	2997	-	- && Q2R2D5.1 RecName: Full=Receptor kinase-like protein Xa21; Contains: RecName: Full=Receptor kinase-like protein Xa21, processed; Flags: Precursor && PF13855:Leucine rich repeat|PF08263:Leucine rich repeat N-terminal domain|PF07714:Protein tyrosine kinase	Pkinase_Tyr
Os05g0189300	0	4.11072	0	15.6739	4.84408	19.5821	1.37024	13.3667	-3.28627	0.0028367	0.0381945	-	5	5472720	5474678	-	1058	-	- && P27061.1 RecName: Full=Acid phosphatase 1; AltName: Full=Apase-1(1); Flags: Precursor && PF03767:HAD superfamily, subfamily IIIB (Acid phosphatase)	-
Os03g0160600	11.2674	25.692	22.7508	57.7975	38.7527	43.8266	19.9034	46.7923	-1.23321	0.00284303	0.0382581	-	3	3229040	3233510	-	2980	-	- && Q8GTS0.1 RecName: Full=Type I inositol polyphosphate 5-phosphatase 4; Short=At5PTase4 && PF03372:Endonuclease/Exonuclease/phosphatase family	Exo_endo_phos
Os01g0106300	4.09722	6.16608	0	7.83695	4.84408	56.8813	3.4211	23.1875	-2.76202	0.00287364	0.0385603	-	1	322591	323923	-	1253	-	- && P52580.1 RecName: Full=Isoflavone reductase homolog IRL && PF05368:NmrA-like family	NmrA
novel.314	31.7535	33.9134	27.9215	18.6128	7.75053	1.86496	31.1961	9.40942	1.73654	0.00295372	0.0394335	-	12	6583324	6584353	+	1030	-	PF08263:Leucine rich repeat N-terminal domain	LRRNT_2
Os01g0581800	29.7049	30.8304	21.7167	11.7554	7.75053	8.39233	27.4173	9.29943	1.56147	0.00296712	0.0395678	-	1	22552874	22554531	-	1658	-	- && - && -	-
Os06g0692700	14.3403	16.4429	22.7508	32.3274	41.6591	53.1514	17.8447	42.3793	-1.24954	0.0029952	0.0398597	-	6	28905577	28909024	-	2672	-	- && - && -	-
Os01g0908600	25.6077	14.3875	28.9556	53.8791	43.5967	54.0839	22.9836	50.5199	-1.13667	0.00299744	0.0398597	OsProT1	1	39562727	39565686	+	1635	-	- && Q60DN5.1 RecName: Full=Proline transporter 1; AltName: Full=OsPROT && PF01490:Transmembrane amino acid transporter protein	Aa_trans
Os12g0473900	56.3368	56.5224	53.7747	20.572	35.8462	24.2445	55.5446	26.8876	1.04693	0.00308561	0.0408943	-	12	17070764	17071549	+	786	-	- && - && PF14547:Hydrophobic seed protein	-
Os02g0676400	36.875	81.1867	76.5255	18.6128	32.9398	37.2992	64.8624	29.6173	1.12883	0.00316889	0.0417408	-	2	27591163	27592963	+	1801	-	- && O82752.1 RecName: Full=Protein DETOXIFICATION 49; Short=AtDTX49; AltName: Full=Multidrug and toxic compound extrusion protein 49; Short=MATE protein 49; AltName: Full=Protein NOVEL ION CARRIER 1; Short=Protein NIC1 && PF01554:MatE	MatE
Os06g0105700	2.04861	6.16608	3.10239	18.6128	12.5946	20.5146	3.77236	17.2407	-2.19296	0.00317129	0.0417492	OsUMAMIT10	6	394583	397914	-	1490	-	- && Q9FGL0.1 RecName: Full=WAT1-related protein At5g47470 && PF00892:EamA-like transporter family	DUF6
Os11g0323860	2.04861	0	3.10239	3.91848	36.815	5.59489	1.717	15.4428	-3.16929	0.00323546	0.0424052	-	11	12226617	12227793	-	638	-	- && - && -	-
Os08g0106300	25.6077	64.7438	48.604	23.5109	17.4387	16.7847	46.3185	19.2447	1.26816	0.00325715	0.0426185	-	8	319646	321012	+	894	-	- && Q43257.1 RecName: Full=indole-2-monooxygenase; AltName: Full=Cytochrome P450 71C4; AltName: Full=Protein benzoxazineless 2 && PF00067:Cytochrome P450	p450
Os03g0172100	88.0903	68.8545	40.331	19.5924	31.9709	40.0967	65.7586	30.5533	1.10394	0.00326677	0.042632	-	3	3866613	3867121	+	509	-	- && - && -	-
Os12g0221400	454.792	475.816	387.798	32.3274	114.32	4.6624	439.469	50.4367	3.12354	0.00329419	0.0429133	-	12	6563411	6564155	-	745	-	- && - && -	-
Os07g0142200	1.02431	4.11072	2.06826	22.5312	12.5946	8.39233	2.40109	14.5061	-2.59332	0.00332726	0.0432014	gp1	7	2176824	2177640	+	817	-	- && - && -	-
Os12g0204600	21.5104	18.4982	8.27303	4.8981	3.87527	0	16.0939	2.92445	2.47182	0.00353701	0.0451809	-	12	5469046	5471369	-	2324	-	- && Q9LRR4.1 RecName: Full=Putative disease resistance RPP13-like protein 1 && PF00931:NB-ARC domain	NB-ARC
Os11g0660400	3.07292	7.19376	0	89.1453	4.84408	177.171	3.42222	90.3869	-4.72279	0.00367179	0.0464263	OsWD40-191	11	26503050	26507799	-	4210	-	- && Q9SZQ5.1 RecName: Full=WD repeat-containing protein VIP3; AltName: Full=Protein BOUQUET-1; Short=boq-1; AltName: Full=Protein SKI8 homolog; AltName: Full=Protein VERNALIZATION INDEPENDENCE 3; AltName: Full=Protein ZWERGERL; Short=zwg && -	-
Os01g0113500	7.17014	13.3598	7.2389	36.2459	22.2828	24.2445	9.25629	27.5911	-1.57478	0.00370507	0.0467471	-	1	734071	737556	+	2542	-	- && P93604.1 RecName: Full=Rust resistance kinase Lr10; AltName: Full=Probable receptor-like serine/threonine-protein kinase LRK10; Flags: Precursor && PF00069:Protein kinase domain	Pkinase
Os03g0435900	41.9965	0	2.06826	0.979619	0.968816	0.932481	14.6883	0.960305	3.93582	0.00373548	0.0471057	-	3	18390335	18392238	-	671	-	- && Q9M0N8.1 RecName: Full=Mitotic-spindle organizing protein 1B; AltName: Full=GCP3-interacting protein 1; Short=AtGIP1; AltName: Full=Mitotic-spindle organizing protein associated with a ring of gamma-tubulin 1B; Short=AtGIP1B && PF12554:Mitotic-spindle organizing gamma-tubulin ring associated	-
Os02g0714700	25.6077	23.6366	40.331	57.7975	74.5989	49.4215	29.8584	60.606	-1.02115	0.0037948	0.0477266	-	2	29635986	29639344	+	1647	-	- && - && -	-
novel.930	0	4.11072	5.17064	14.6943	33.9086	5.59489	3.09379	18.0659	-2.54607	0.00383286	0.0481288	-	7	5366715	5382443	+	3093	-	PF04094:Protein of unknown function (DUF390)	-
Os12g0508400	11.2674	19.5259	7.2389	2.93886	1.93763	0.932481	12.6774	1.93632	2.71834	0.00385139	0.0482331	-	12	19543820	19544475	+	616	-	- && - && -	-
novel.920	4.09722	4.11072	9.30716	31.3478	18.4075	14.9197	5.83837	21.5583	-1.88419	0.00391585	0.0489109	-	6	30844950	30846357	-	1121	-	-	-
Os11g0604500	14.3403	23.6366	17.5802	3.91848	3.87527	6.52737	18.519	4.7737	1.95195	0.00395959	0.0493791	-	11	23283945	23284798	-	854	-	- && - && -	-

## Sheet: Table S4
Table S4 DEGs in irClpP6-4_Con vs WT_Con
gene_id	irClpP6-4_Con_1	irClpP6-4_Con_2	irClpP6-4_Con_3	WT_Con_1	WT_Con_2	WT_Con_3	irClpP6-4_Con	WT_Con	log2FoldChange	pvalue	padj	gene_name	gene_chr	gene_start	gene_end	gene_strand	gene_length	gene_biotype	gene_description	tf_family
Os07g0511400	669.494	802.65	528.405	4.91999	0.90137	0	666.849	1.94045	8.40873	4.57466e-40	1.10355e-35	-	7	19533865	19534577	+	713	-	- && - && -	-
Os10g0144700	72.5711	81.2471	113.153	559.895	674.224	532.9	88.9905	589.006	-2.7302	4.04647e-34	4.88065e-30	-	10	2709163	2711992	-	1626	-	- && O64637.1 RecName: Full=Cytochrome P450 76C2; AltName: Full=Protein YELLOW-LEAF-SPECIFIC GENE 6 && PF00067:Cytochrome P450	p450
Os07g0115200	1816.32	3255.24	4094.87	0	0	0	3055.48	0	14.0421	6.26075e-31	5.03427e-27	OsSTA185	7	834313	835728	-	1416	-	- && - && -	-
novel.1215	706.29	1539.23	628.748	34.4399	71.2082	57.058	958.09	54.2354	4.14162	1.06762e-28	6.43854e-25	-	Syng_TIGR_047	12157	15742	+	2059	-	PF02517:CPBP intramembrane metalloprotease	-
Os08g0184800	8.17702	2.67847	0	208.608	175.767	308.974	3.6185	231.116	-5.99353	3.96251e-27	1.91175e-23	-	8	4971046	4973826	-	2294	-	- && Q8S1D9.1 RecName: Full=Phospholipase A1 EG1, chloroplastic/mitochondrial; AltName: Full=Protein EXTRA GLUME 1; Flags: Precursor >A2WY00.1 RecName: Full=Phospholipase A1 EG1, chloroplastic/mitochondrial; AltName: Full=Protein EXTRA GLUME 1; Flags: Precursor && -	-
Os10g0136200	7.1549	3.5713	0	150.552	190.189	248.687	3.5754	196.476	-5.76348	3.29136e-26	1.32329e-22	OsFbox525	10	2243002	2245973	-	2037	-	- && - && PF12937:F-box-like	-
novel.325	2017.68	1904.4	1569.2	517.583	326.296	397.253	1830.43	413.711	2.14611	1.45649e-25	5.01929e-22	-	12	12357454	12369316	+	11843	-	PF03732:Retrotransposon gag protein|PF04564:U-box domain	U-box
Os03g0299700	761.485	781.222	932.981	0	0	0	825.229	0	12.1532	2.15732e-24	6.50512e-21	-	3	10518913	10520192	+	1280	-	- && - && PF12620:Protein of unknown function (DUF3778)	-
Os08g0371200	6.13277	10.7139	4.26994	136.776	157.74	121.652	7.03887	138.722	-4.27235	1.04287e-23	2.79524e-20	-	8	17299388	17323234	-	636	-	- && - && -	-
Os03g0115800	1094.7	2604.37	3419.15	0	0	0	2372.74	0	13.6772	1.48807e-23	3.58968e-20	-	3	887193	888623	-	1431	-	- && - && -	-
Os10g0136100	5.11064	1.78565	2.13497	114.144	178.471	194.858	3.01042	162.491	-5.77133	2.86606e-23	6.28527e-20	-	10	2226411	2231401	-	3577	-	- && Q39214.1 RecName: Full=Disease resistance protein RPM1; AltName: Full=Resistance to Pseudomonas syringae protein 3 && PF00931:NB-ARC domain	NB-ARC
Os10g0109300	1226.55	766.044	811.288	3952.72	3260.25	3743.22	934.628	3652.06	-1.96649	2.06148e-21	4.1441e-18	PRX125	10	655625	658866	-	1447	-	- && Q9LEH3.1 RecName: Full=Peroxidase 15; Short=Prx15; AltName: Full=Anionic peroxidase; Flags: Precursor && PF00141:Peroxidase	-
Os10g0137300	6.13277	7.1426	0	144.648	310.071	133.494	4.42512	196.071	-5.43376	1.58219e-20	2.93594e-17	-	10	2317204	2317845	+	495	-	- && - && -	-
Os03g0629800	355.7	347.309	310.638	0	0	0	337.882	0	10.8656	1.09327e-19	1.88378e-16	-	3	24046131	24047194	+	1064	-	- && - && -	-
novel.943	4.08851	0	0	197.784	194.696	120.575	1.36284	171.018	-7.01569	1.20246e-18	1.9338e-15	-	7	14642922	14649565	+	3559	-	PF14291:Domain of unknown function (DUF4371)	-
Os08g0182400	75.6375	36.6058	43.7668	258.792	352.436	366.032	52.0034	325.753	-2.65094	3.68785e-18	5.56013e-15	-	8	4817967	4820693	+	850	-	- && - && -	-
Os07g0450100	2.04426	1.78565	0	162.36	136.107	103.35	1.27664	133.939	-6.67213	3.5635e-17	5.05661e-14	-	7	15458182	15460126	-	1841	-	- && - && -	-
Os01g0678000	335.258	360.701	421.656	116.112	130.699	119.499	372.538	122.103	1.60771	9.02323e-17	1.20926e-13	-	1	27875639	27878341	+	2703	-	- && - && PF11145:Protein of unknown function (DUF2921)	-
Os03g0399800	419.072	508.017	486.773	1851.88	1425.07	1189.6	471.287	1488.85	-1.6594	1.17891e-16	1.49679e-13	-	3	16209132	16210009	+	781	-	- && A2WMH2.1 RecName: Full=Protein GOS9 >P0C5C6.1 RecName: Full=Protein GOS9 && PF01419:Jacalin-like lectin domain	-
Os02g0589900	13.2877	16.0708	17.0797	94.4638	113.573	144.26	15.4794	117.432	-2.92178	8.41793e-16	1.01533e-12	-	2	22761941	22778592	-	1449	-	- && Q10PI6.1 RecName: Full=Lecithin-cholesterol acyltransferase-like 1 && -	-
Os01g0108400	35.7745	56.248	29.8895	411.311	541.723	184.093	40.6373	379.042	-3.21674	1.23784e-15	1.42193e-12	-	1	455707	457425	+	772	-	- && - && -	-
Os10g0132700	73.5932	72.3188	73.6564	215.496	246.975	293.902	73.1895	252.124	-1.78373	4.65953e-15	5.10918e-12	-	10	2044042	2057059	+	2619	-	- && Q38834.2 RecName: Full=Disease resistance RPP13-like protein 4; AltName: Full=Disease resistance protein ZAR1; AltName: Full=Protein HOPZ-ACTIVATED RESISTANCE 1 && -	-
novel.1077	2.04426	1.78565	0	99.3838	78.4192	143.183	1.27664	106.995	-6.34605	6.74537e-15	7.07472e-12	-	8	5773614	5776569	-	2426	-	-	-
Os12g0508400	75.6375	65.1762	112.086	5.90399	1.80274	2.15313	84.2998	3.28662	4.6823	1.01379e-14	9.93288e-12	-	12	19543820	19544475	+	616	-	- && - && -	-
Os07g0434100	2.04426	0	2.13497	104.304	105.46	77.5127	1.39307	95.7589	-6.17615	1.0294e-14	9.93288e-12	-	7	14485762	14489280	+	3519	-	- && - && -	-
Os01g0713200	2370.31	2577.59	2986.82	1052.88	1126.71	778.357	2644.91	985.982	1.4229	1.3237e-14	1.22814e-11	Gns10	1	29620958	29622314	+	1176	-	- && P15737.1 RecName: Full=Glucan endo-1,3-beta-glucosidase GII; AltName: Full=(1->3)-beta-glucan endohydrolase GII; AltName: Full=(1->3)-beta-glucanase isoenzyme GII; AltName: Full=Beta-1,3-endoglucanase GII; Flags: Precursor && PF00332:Glycosyl hydrolases family 17	Glyco_hydro_17
novel.1048	3.06638	0	0	160.392	82.0246	115.193	1.02213	119.203	-6.90794	5.63645e-14	5.03585e-11	-	8	14616217	14659404	+	2636	-	-	-
Os07g0539100	1544.44	1977.61	2227.84	750.791	820.246	673.93	1916.63	748.322	1.35634	6.4617e-14	5.56699e-11	Gns11	7	21223272	21225870	-	2090	-	- && Q8VYE5.1 RecName: Full=Glucan endo-1,3-beta-glucosidase 12; AltName: Full=(1->3)-beta-glucan endohydrolase 12; Short=(1->3)-beta-glucanase 12; AltName: Full=Beta-1,3-endoglucanase 12; Short=Beta-1,3-glucanase 12; Flags: Precursor && PF00332:Glycosyl hydrolases family 17|PF07983:X8 domain	Glyco_hydro_17
Os10g0135100	284.152	299.989	388.564	63.9599	30.6466	12.9188	324.235	35.8417	3.17278	8.80474e-14	7.32403e-11	-	10	2169099	2170542	+	1444	-	- && - && PF00931:NB-ARC domain	NB-ARC
Os08g0290900	0	0	0	113.16	83.8274	82.8955	0	93.2942	-8.99907	2.61956e-13	2.10639e-10	-	8	11629289	11631476	+	1582	-	- && - && -	-
Os01g0262401	115.5	139.281	52.3067	0	0	0	102.363	0	9.14446	5.11347e-13	3.97911e-10	-	1	8856489	8857022	-	534	-	- && - && -	-
Os07g0432800	7.1549	0.892825	0	63.9599	91.0383	82.8955	2.68257	79.2979	-4.90329	5.33533e-13	4.02201e-10	-	7	14368433	14371039	-	2142	-	- && P0C508.1 RecName: Full=DNA-directed RNA polymerase subunit beta''; AltName: Full=PEP; AltName: Full=Plastid-encoded RNA polymerase subunit beta''; Short=RNA polymerase subunit beta'' && -	-
Os04g0171800	556.038	486.59	400.306	1064.69	1101.47	1230.51	480.978	1132.22	-1.23449	6.38518e-13	4.66757e-10	-	4	4874385	4878321	+	3311	-	- && Q43135.3 RecName: Full=Tyrosine N-monooxygenase; AltName: Full=Cytochrome P450 79A1; AltName: Full=Cytochrome P450Tyr && -	-
Os08g0338000	281.085	222.313	138.773	753.743	687.745	735.294	214.057	725.594	-1.76007	1.38176e-12	9.8036e-10	-	8	15199790	15201818	-	1661	-	- && - && -	-
Os06g0579100	1584.3	1495.48	1019.45	454.607	507.471	317.587	1366.41	426.555	1.67873	1.65324e-12	1.13946e-09	-	6	22556192	22558566	+	2034	-	- && - && -	-
Os08g0331800	628.609	738.366	758.981	162.36	224.441	81.819	708.652	156.207	2.17824	2.547e-12	1.7067e-09	-	8	14663398	14664089	-	562	-	- && - && -	-
Os06g0210100	285.174	255.348	229.509	597.287	572.37	533.976	256.677	567.878	-1.14554	2.94539e-12	1.92031e-09	-	6	5619150	5621697	+	865	-	- && Q6IDL4.1 RecName: Full=Transmembrane emp24 domain-containing protein p24delta3; AltName: Full=p24 family protein delta1a; Short=p24delta1a; AltName: Full=p24 family protein delta3; Short=p24delta3; Flags: Precursor && PF01105:emp24/gp25L/p24 family/GOLD	-
novel.63	55.1949	56.248	60.8466	0.983998	3.60548	2.15313	57.4298	2.24754	4.65259	4.53926e-12	2.8077e-09	-	1	4159021	4160097	-	773	-	-	-
Os01g0108500	10.2213	4.46412	1.06748	150.552	145.121	46.2923	5.25096	113.988	-4.43837	7.26302e-12	4.38015e-09	-	1	460177	461371	+	1195	-	- && - && PF12620:Protein of unknown function (DUF3778)	-
Os01g0339500	52.1285	44.6412	11.7423	238.128	247.877	242.227	36.1707	242.744	-2.74035	1.08305e-11	6.37232e-09	ONAC030	1	13342969	13345864	-	1976	-	- && - && -	-
Os06g0185500	327.081	295.525	314.908	75.7679	82.0246	26.9141	312.505	61.5689	2.33689	1.75887e-11	1.01022e-08	OsHCT4	6	4301775	4303137	-	1363	-	- && Q5SMM6.1 RecName: Full=Hydroxycinnamoyltransferase 4; Short=OsHCT4; AltName: Full=BAHD-like hydroxycinnamoyl transferase HCT4; AltName: Full=Glycerol hydroxycinnamoyl transferase && PF02458:Transferase family	-
novel.994	6.13277	0	0	83.6399	57.6877	65.6705	2.04426	68.9993	-5.1114	2.20655e-11	1.23788e-08	-	7	15186839	15191343	-	1508	-	-	-
Os12g0458100	219.757	182.136	317.043	37.3919	23.4356	3.2297	239.646	21.3524	3.47926	3.64153e-11	1.99647e-08	HSR201	12	15998272	16005479	-	1825	-	- && Q0ING3.1 RecName: Full=Spermidine hydroxycinnamoyltransferase 2 && PF02458:Transferase family	-
novel.944	0	1.78565	0	123	112.671	64.5939	0.595217	100.088	-7.25853	3.98412e-11	2.13576e-08	-	7	15452086	15455078	+	2907	-	-	-
Os06g0102100	552.971	569.622	671.447	1540.94	1106.88	1329.56	598.014	1325.79	-1.14878	1.11997e-10	5.87329e-08	CYP93G2	6	163259	165320	+	1932	-	- && Q42798.1 RecName: Full=3,9-dihydroxypterocarpan 6A-monooxygenase; AltName: Full=Cytochrome P450 93A1; AltName: Full=Dihydroxypterocarpan 6a-hydroxylase; Short=D6aH && PF00067:Cytochrome P450	p450
Os07g0416700	2.04426	0	3.20245	52.1519	69.4055	41.9861	1.7489	54.5145	-5.03332	1.69095e-10	8.67891e-08	OsFAD2-4	7	13180808	13182551	-	1135	-	- && A3F5L3.1 RecName: Full=Fatty acid desaturase DES2; Short=SbDES2 && -	-
Os08g0508800	745.131	581.229	788.871	262.728	274.918	150.719	705.077	229.455	1.61704	1.83273e-10	9.02264e-08	Lox2:Os:1	8	25216460	25224078	-	3152	-	- && P38419.2 RecName: Full=Lipoxygenase 7, chloroplastic; Flags: Precursor && PF01477:PLAT/LH2 domain|PF00305:Lipoxygenase	Lipoxygenase
Os01g0104900	105.279	91.0681	107.816	265.68	224.441	284.213	101.388	258.111	-1.34901	2.10754e-10	1.01681e-07	-	1	270179	275084	-	1773	-	- && Q5SMM6.1 RecName: Full=Hydroxycinnamoyltransferase 4; Short=OsHCT4; AltName: Full=BAHD-like hydroxycinnamoyl transferase HCT4; AltName: Full=Glycerol hydroxycinnamoyl transferase && PF02458:Transferase family	-
Os07g0538400	225.89	255.348	258.331	100.368	109.066	83.9721	246.523	97.8019	1.33083	3.10345e-10	1.46793e-07	OsRLCK235	7	21168993	21170678	+	1304	-	- && Q0D5R3.1 RecName: Full=Cysteine-rich receptor-like protein kinase 6; Short=Cysteine-rich RLK6; Flags: Precursor && PF07714:Protein tyrosine kinase	Pkinase_Tyr
Os06g0671600	360.811	275.883	258.331	123	86.5315	72.1299	298.342	93.8871	1.66648	3.63576e-10	1.68664e-07	OsSAUR26	6	27862160	27862997	+	581	-	- && - && -	-
novel.60	6.13277	0.892825	0	64.9439	41.463	62.4408	2.34186	56.2826	-4.60003	6.8086e-10	3.09894e-07	-	1	403682	405351	-	1670	-	-	-
Os10g0136400	21.4647	8.03542	18.1472	73.7999	105.46	103.35	15.8824	94.2035	-2.58286	7.32887e-10	3.27397e-07	-	10	2249407	2252236	-	1985	-	- && Q8W4G6.2 RecName: Full=Cysteine-rich receptor-like protein kinase 15; Short=Cysteine-rich RLK15; Flags: Precursor && PF01657:Salt stress response/antifungal|PF07714:Protein tyrosine kinase	Pkinase_Tyr
Os11g0160400	2280.37	2105.28	3560.06	768.503	843.682	326.199	2648.57	646.128	2.03456	8.04188e-10	3.52717e-07	-	11	2932659	2933842	+	1184	-	- && - && -	-
Os10g0210500	143.098	141.959	146.245	489.047	281.227	454.311	143.767	408.195	-1.50468	1.29849e-09	5.59347e-07	OsUMAMIT15	10	7810692	7817132	-	2882	-	- && Q9SUF1.1 RecName: Full=WAT1-related protein At4g08290 && -	-
Os05g0369900	198.293	189.279	225.239	39.3599	81.1233	41.9861	204.27	54.1564	1.90778	1.63162e-09	6.9052e-07	OsEXO70FX1	5	17779880	17781705	+	1627	-	- && - && PF03081:Exo70 exocyst complex subunit	Exo70
Os06g0293500	413.962	396.414	409.914	143.664	204.611	120.575	406.763	156.283	1.37629	1.8023e-09	7.49602e-07	-	6	10780823	10784833	-	2836	-	- && - && PF13962:Domain of unknown function	-
Os01g0692400	51.1064	58.9264	90.7361	1.968	0	0	66.923	0.655999	6.67306	1.92298e-09	7.86239e-07	-	1	28575815	28576674	-	860	-	- && - && -	-
Os12g0481400	35.7745	55.3551	27.7546	0	0	0	39.6281	0	7.77673	2.29254e-09	9.21716e-07	-	12	17708000	17715334	-	4626	-	- && Q9LRR4.1 RecName: Full=Putative disease resistance RPP13-like protein 1 && PF00931:NB-ARC domain	NB-ARC
Os01g0597800	91.9915	91.961	145.178	23.616	26.1397	29.0673	109.71	26.2743	2.06162	2.60945e-09	1.01529e-06	-	1	23456074	23458035	+	1962	-	- && Q9AT54.1 RecName: Full=Scopoletin glucosyltransferase; AltName: Full=Phenylpropanoid:glucosyltransferase 1 && PF00201:UDP-glucoronosyl and UDP-glucosyl transferase	UDPGT
Os05g0527700	34.7523	34.8202	35.227	0	0	0	34.9332	0	7.59137	3.55342e-09	1.35296e-06	-	5	26223422	26224327	-	906	-	- && - && -	-
Os01g0104350	224.868	206.243	244.454	86.5918	97.3479	102.274	225.188	95.4045	1.23859	3.5895e-09	1.35296e-06	-	1	224916	225543	+	628	-	- && - && -	-
Os01g0963000	3755.3	4116.82	5695.03	1832.2	2156.98	1299.41	4522.38	1762.87	1.35879	4.45531e-09	1.65347e-06	prx22	1	42441660	42442936	+	1277	-	- && P84516.2 RecName: Full=Cationic peroxidase SPC4; Flags: Precursor && PF00141:Peroxidase	-
Os04g0468000	174.784	165.173	168.662	62.9759	74.8137	60.2877	169.54	66.0257	1.35705	4.7841e-09	1.74859e-06	-	4	23385292	23391194	-	5903	-	- && - && -	-
Os11g0625900	328.103	374.986	481.435	183.024	112.671	120.575	394.842	138.757	1.50854	5.21691e-09	1.87832e-06	-	11	24533715	24537481	-	3767	-	- && Q1MX30.1 RecName: Full=Receptor kinase-like protein Xa21; Contains: RecName: Full=Receptor kinase-like protein Xa21, processed; Flags: Precursor && PF00069:Protein kinase domain|PF13855:Leucine rich repeat|PF08263:Leucine rich repeat N-terminal domain	Pkinase
novel.61	2.04426	0	0	51.1679	57.6877	60.2877	0.681419	56.3811	-6.41464	5.53855e-09	1.9648e-06	-	1	436157	437294	-	1138	-	PF13456:Reverse transcriptase-like	-
novel.328	55.1949	51.7838	16.0123	0	0	0	40.997	0	7.82459	6.32788e-09	2.18068e-06	-	12	12963806	12964720	+	895	-	-	-
Os01g0908600	177.85	172.315	222.037	707.495	406.518	464	190.734	526.004	-1.46441	6.51394e-09	2.21318e-06	OsProT1	1	39562727	39565686	+	1635	-	- && Q60DN5.1 RecName: Full=Proline transporter 1; AltName: Full=OsPROT && PF01490:Transmembrane amino acid transporter protein	Aa_trans
Os08g0130400	89.9473	100.889	95.0061	228.288	197.4	256.223	95.2808	227.303	-1.25173	8.02887e-09	2.65316e-06	-	8	1716498	1719881	-	1866	-	- && Q8VYJ1.1 RecName: Full=2-succinylbenzoate--CoA ligase, chloroplastic/peroxisomal; AltName: Full=Acyl-activating enzyme 14; AltName: Full=O-succinylbenzoyl-CoA ligase; Flags: Precursor && -	-
Os05g0155800	156.386	122.317	125.963	38.3759	39.6603	15.0719	134.889	31.036	2.10963	1.08216e-08	3.52771e-06	-	5	3269118	3270614	+	1497	-	- && Q8GT20.1 RecName: Full=Benzyl alcohol O-benzoyltransferase; AltName: Full=Benzoyl coenzyme A:benzyl alcohol benzoyl transferase && PF02458:Transferase family	-
Os03g0426350	9.19915	1.78565	1.06748	46.2479	46.8712	83.9721	4.01743	59.0304	-3.88666	1.18535e-08	3.81257e-06	-	3	17809791	17810736	+	946	-	- && - && -	-
Os08g0185900	188.072	232.134	241.251	86.5918	98.2493	93.6612	220.486	92.8341	1.24758	1.32031e-08	4.19077e-06	-	8	5034835	5035725	-	891	-	- && P0CH27.1 RecName: Full=Ubiquitin-60S ribosomal protein L40; Contains: RecName: Full=Ubiquitin; Contains: RecName: Full=60S ribosomal protein L40; Flags: Precursor && PF00240:Ubiquitin family	ubiquitin
novel.983	33.7302	24.9991	32.0245	0	0	0	30.2513	0	7.38219	1.61433e-08	5.05746e-06	-	7	7391520	7393645	-	1473	-	PF04827:Plant transposon protein	DUF635
Os02g0607700	721.622	758.901	894.552	358.175	414.63	254.069	791.692	342.292	1.20779	1.75221e-08	5.41906e-06	-	2	23829191	23834725	-	1123	-	- && O75828.3 RecName: Full=Carbonyl reductase [NADPH] 3; AltName: Full=NADPH-dependent carbonyl reductase 3; AltName: Full=Short chain dehydrogenase/reductase family 21C member 2 && PF00106:short chain dehydrogenase	adh_short
Os12g0209000	36.7966	41.0699	32.0245	97.4158	122.586	124.882	36.6304	114.961	-1.64588	1.94312e-08	5.91992e-06	-	12	5685138	5689991	-	1382	-	- && P51281.1 RecName: Full=Uncharacterized protein ycf45; AltName: Full=ORF565 && PF00004:ATPase family associated with various cellular activities (AAA)	AAA
Os07g0446600	56.217	66.9619	51.2392	157.44	201.005	139.954	58.1394	166.133	-1.51313	1.96324e-08	5.91992e-06	-	7	15280459	15282788	-	2330	-	- && - && PF11779:Protein of unknown function (DUF3317)	-
Os12g0639500	100.169	124.995	210.294	37.3919	36.9562	19.3782	145.153	31.2421	2.20862	2.20119e-08	6.55547e-06	-	12	27426312	27427718	+	1407	-	- && Q9FLD5.1 RecName: Full=AAA-ATPase ASD, mitochondrial; AltName: Full=AAA-ATPase 1; AltName: Full=Protein ATPASE-IN-SEED-DEVELOPMENT && PF14363:Domain associated at C-terminal with AAA|PF00004:ATPase family associated with various cellular activities (AAA)	AAA
Os07g0432201	0	0.892825	0	100.368	41.463	30.1438	0.297608	57.3249	-7.33522	2.62458e-08	7.62804e-06	-	7	14292161	14292961	+	570	-	- && - && -	-
Os12g0240900	204.426	133.924	166.527	14.76	43.2657	5.38283	168.292	21.1362	2.97741	2.74099e-08	7.87152e-06	NOMT	12	7801961	7807354	-	1304	-	- && Q0IP69.2 RecName: Full=Naringenin 7-O-methyltransferase; Short=NOMT; Short=OsNOMT && PF00891:O-methyltransferase|PF08100:Dimerisation domain	-
Os07g0414000	1201	1141.92	1689.83	698.639	493.049	583.498	1344.25	591.729	1.18376	2.83731e-08	7.95865e-06	-	7	13053764	13055292	+	1529	-	- && Q8GSN8.1 RecName: Full=Malonyl-coenzyme A:anthocyanin 3-O-glucoside-6''-O-malonyltransferase; Short=Dv3MaT; Short=Malonyl CoA:anthocyanin 3-O-glucoside-6''-O-malonyltransferase && PF02458:Transferase family	-
novel.256	19.4204	66.9619	21.3497	0	0	0	35.9107	0	7.63574	3.15726e-08	8.75433e-06	-	11	24898613	24902629	+	825	-	-	-
Os02g0252400	24.5311	28.5704	29.8895	0	0	0	27.6637	0	7.25486	3.381e-08	9.26818e-06	RPBF	2	8590318	8593735	-	1537	-	- && O24463.1 RecName: Full=Dof zinc finger protein PBF; AltName: Full=Prolamin box-binding factor && PF02701:Dof domain, zinc finger	zf-Dof
novel.930	5.11064	10.7139	0	81.6719	39.6603	106.58	5.27485	75.9707	-3.80941	3.54868e-08	9.61851e-06	-	7	5366715	5382443	+	3093	-	PF04094:Protein of unknown function (DUF390)	-
Os07g0511301	45.9958	36.6058	13.8773	0	0	0	32.1596	0	7.47391	4.10841e-08	1.10119e-05	-	7	19533397	19533696	-	300	-	- && - && -	-
Os05g0132800	36.7966	46.4269	46.9693	0	0.90137	0	43.3976	0.300457	6.943	4.27298e-08	1.13026e-05	-	5	1910293	1910914	+	622	-	- && - && -	-
Os08g0240000	63.3719	49.1054	88.6012	219.432	177.57	181.94	67.0262	192.98	-1.53142	4.31057e-08	1.13026e-05	-	8	8472521	8475589	-	1234	-	- && P52836.2 RecName: Full=Flavonol 3-sulfotransferase; Short=F3-ST && PF00685:Sulfotransferase domain	Sulfotransfer_1
Os11g0649700	636.786	716.938	847.582	375.887	346.126	235.768	733.769	319.26	1.1991	5.27657e-08	1.33986e-05	-	11	25895922	25897219	-	866	-	- && Q2R0D1.1 RecName: Full=CASP-like protein 1U2; Short=OsCASPL1U2 && PF04535:Domain of unknown function (DUF588)	-
Os07g0249800	48.04	30.356	53.3742	130.872	155.036	122.728	43.9234	136.212	-1.64151	6.43865e-08	1.61791e-05	-	7	8326644	8329267	-	1062	-	- && Q8H3C8.1 RecName: Full=IAA-amino acid hydrolase ILR1-like 8; Flags: Precursor && PF01546:Peptidase family M20/M25/M40|PF07687:Peptidase dimerisation domain	Peptidase_M20
Os02g0281200	526.396	565.158	459.018	277.488	256.89	187.322	516.857	240.567	1.10222	7.25707e-08	1.80477e-05	-	2	10444568	10450918	+	4146	-	- && Q7XA42.2 RecName: Full=Putative disease resistance protein RGA1; AltName: Full=RGA3-blb && PF00931:NB-ARC domain	NB-ARC
Os06g0128800	512.086	516.946	681.055	301.103	288.438	240.074	570.029	276.539	1.04192	8.47216e-08	2.08545e-05	-	6	1526538	1527491	-	954	-	- && - && -	-
Os03g0802500	570.347	639.263	930.846	256.824	242.468	95.8143	713.485	198.369	1.84465	8.62842e-08	2.10246e-05	-	3	33482291	33484111	+	1821	-	- && Q9LJJ7.1 RecName: Full=AAA-ATPase At3g28580 && PF00004:ATPase family associated with various cellular activities (AAA)|PF14363:Domain associated at C-terminal with AAA	AAA
Os12g0175400	49.0621	50.891	39.4969	118.08	131.6	124.882	46.4834	124.854	-1.42242	8.84278e-08	2.13314e-05	R2R3-MYB	12	3840945	3842155	+	1027	-	- && P81393.1 RecName: Full=Myb-related protein 308 && PF00249:Myb-like DNA-binding domain	Myb_DNA-binding
novel.424	25.5532	18.7493	32.0245	0	0	0	25.4423	0	7.13125	9.88448e-08	2.36082e-05	-	2	15026310	15029152	+	835	-	-	-
Os04g0688300	118.567	91.961	202.822	491.999	453.389	330.506	137.783	425.298	-1.62974	1.08892e-07	2.5753e-05	prx61	4	35207157	35208610	-	1299	-	- && P84516.2 RecName: Full=Cationic peroxidase SPC4; Flags: Precursor && PF00141:Peroxidase	-
Os10g0136150	22.4868	14.2852	3.20245	63.9599	101.855	119.499	13.3248	95.1045	-2.82839	1.14529e-07	2.68231e-05	-	10	2239218	2242139	-	1749	-	- && - && -	-
Os01g0167900	200.337	191.957	250.859	92.4958	101.855	79.6658	214.384	91.3388	1.22689	1.2141e-07	2.81612e-05	-	1	3473846	3477048	-	1852	-	- && F4KEW8.1 RecName: Full=Protein NETWORKED 4A && PF07765:KIP1-like protein	-
Os03g0797400	1741.71	1991	2525.67	989.902	1001.42	578.116	2086.12	856.48	1.28367	1.2447e-07	2.85962e-05	OsIGL	3	33214544	33217418	-	1371	-	- && P42390.2 RecName: Full=Indole-3-glycerol phosphate lyase, chloroplastic; AltName: Full=Benzoxazineless 1; AltName: Full=Indole synthase; AltName: Full=Tryptophan synthase alpha chain; Flags: Precursor && PF00290:Tryptophan synthase alpha chain	-
novel.722	26.5753	31.2489	16.0123	0	0	0	24.6122	0	7.08913	1.56485e-07	3.52793e-05	-	4	31431674	31433309	-	1237	-	-	-
Os08g0531000	431.338	400.878	466.49	191.88	234.356	134.571	432.902	186.935	1.20811	1.78394e-07	3.98463e-05	NPP1	8	26439631	26445473	+	2232	-	- && Q5MAU8.1 RecName: Full=Probable inactive purple acid phosphatase 27; Flags: Precursor && PF16656:Purple acid Phosphatase, N-terminal domain|PF00149:Calcineurin-like phosphoesterase|PF14008:Iron/zinc purple acid phosphatase-like protein C	Metallophos
Os04g0154800	139.009	160.708	204.957	69.8639	42.3644	62.4408	168.225	58.223	1.53355	1.8654e-07	4.12836e-05	-	4	3766206	3768464	+	2259	-	- && - && PF13968:Domain of unknown function (DUF4220)|PF04578:Protein of unknown function, DUF594	-
Os02g0712700	1121.27	1227.63	1241.48	615.983	608.425	346.654	1196.8	523.687	1.19136	2.18627e-07	4.7945e-05	-	2	29519619	29523253	-	2613	-	- && Q9FG33.1 RecName: Full=Probable L-type lectin-domain containing receptor kinase S.5; Short=LecRK-S.5; Flags: Precursor && PF07714:Protein tyrosine kinase|PF00139:Legume lectin domain	Pkinase_Tyr
Os11g0210201	367.966	369.63	380.024	211.56	186.584	139.954	372.54	179.366	1.05241	2.55014e-07	5.54206e-05	RZ53	11	5710677	5711244	-	568	-	- && - && -	-
Os07g0437500	129.81	136.602	144.11	286.343	310.973	240.074	136.841	279.13	-1.03016	2.59194e-07	5.58262e-05	TDC2	7	14668015	14676707	+	1902	-	- && Q7XHL3.1 RecName: Full=Tyrosine decarboxylase 1 && PF00282:Pyridoxal-dependent decarboxylase conserved domain	-
novel.970	0	0	0	29.5199	11.7178	33.3735	0	24.8704	-7.08795	2.99959e-07	6.40345e-05	-	7	364356	365169	-	636	-	-	-
Os01g0647200	3.06638	3.5713	6.4049	109.224	144.219	7.53596	4.34753	86.993	-4.33217	4.52985e-07	9.33962e-05	-	1	26086062	26088337	-	2276	-	- && - && -	-
Os03g0318400	59.2834	78.5686	66.184	16.728	20.7315	8.61252	68.012	15.3573	2.13441	4.57075e-07	9.34409e-05	-	3	11467636	11469150	+	1515	-	- && Q766C3.1 RecName: Full=Aspartic proteinase nepenthesin-1; AltName: Full=Nepenthesin-I; Flags: Precursor && PF14541:Xylanase inhibitor C-terminal|PF14543:Xylanase inhibitor N-terminal	-
Os01g0293900	84.8366	51.7838	54.4417	228.288	132.501	324.046	63.6874	228.278	-1.84134	4.75405e-07	9.55682e-05	prx8	1	10701626	10703130	-	558	-	- && Q9FEQ8.1 RecName: Full=Peroxidase 2; AltName: Full=Plasma membrane-bound peroxidase 2; Short=pmPOX2; Flags: Precursor && -	-
Os03g0150600	4120.2	4400.73	6068.65	2636.13	2586.03	1878.61	4863.19	2366.92	1.03864	5.14107e-07	0.000100855	PT1	3	2807616	2809540	-	1925	-	- && Q8H6H4.1 RecName: Full=Inorganic phosphate transporter 1-1; Short=OsPT1; Short=OsPht1;1; AltName: Full=H(+)/Pi cotransporter && PF00083:Sugar (and other) transporter	Sugar_tr
Os01g0109366	28.6196	11.6067	27.7546	0	0	0	22.6603	0	6.96315	5.14646e-07	0.000100855	-	1	508687	509191	+	505	-	- && - && -	-
Os05g0324700	266.775	228.563	324.515	136.776	96.4466	69.9768	273.285	101.066	1.43229	5.1843e-07	0.000100855	-	5	15077683	15078347	-	665	-	- && - && -	-
novel.121	110.39	144.638	155.853	56.0879	55.8849	45.2157	136.96	52.3962	1.38359	5.49658e-07	0.000106075	-	10	2074020	2082476	+	3076	-	PF02458:Transferase family	-
Os08g0247700	29.6417	38.3915	40.5644	2.95199	6.30959	4.30626	36.1992	4.52261	2.98951	6.80174e-07	0.000130221	-	8	9016956	9020228	+	2970	-	- && C0LGP4.1 RecName: Full=Probable LRR receptor-like serine/threonine-protein kinase At3g47570; Flags: Precursor && PF13855:Leucine rich repeat|PF08263:Leucine rich repeat N-terminal domain|PF07714:Protein tyrosine kinase	Pkinase_Tyr
Os05g0445900	56.217	39.2843	56.5766	123	130.699	132.418	50.6927	128.705	-1.34974	6.85757e-07	0.000130256	ROS1c	5	21843346	21856444	-	6242	-	- && Q9SJQ6.2 RecName: Full=Protein ROS1; AltName: Full=DEMETER-like protein 1; AltName: Full=Repressor of silencing 1 && PF15628:RRM in Demeter	-
Os01g0109000	100.169	78.5686	28.8221	290.279	237.06	234.691	69.1864	254.01	-1.87356	7.47364e-07	0.000140849	-	1	495711	497253	-	1458	-	- && - && -	-
Os12g0187500	182.961	168.744	106.748	405.407	297.452	559.814	152.818	420.891	-1.45929	7.56843e-07	0.00014153	-	12	4398326	4399978	+	1653	-	- && Q9FL59.1 RecName: Full=FT-interacting protein 1 && PF08372:Plant phosphoribosyltransferase C-terminal|PF00168:C2 domain	C2
Os09g0555100	53.1506	38.3915	54.4417	5.90399	11.7178	2.15313	48.6613	6.59164	2.85264	7.67862e-07	0.000142486	OsPILS7b	9	22007439	22010349	+	1583	-	- && Q9FKY4.1 RecName: Full=Protein PIN-LIKES 7; AltName: Full=Auxin efflux carrier-like protein 7 && PF03547:Membrane transport protein	-
Os06g0110000	238.156	176.779	210.294	419.183	360.548	501.679	208.41	427.137	-1.03562	8.1637e-07	0.00015033	OsKAO	6	580670	586443	+	1925	-	- && Q9AXH9.1 RecName: Full=Ent-kaurenoic acid oxidase 1; AltName: Full=gpr5 && PF00067:Cytochrome P450	p450
Os06g0483200	73.5932	122.317	85.3987	264.696	202.808	222.849	93.7696	230.118	-1.29061	8.6043e-07	0.000157244	OsOSC6	6	16400699	16432426	-	5702	-	- && Q2R712.1 RecName: Full=Achilleol B synthase && -	-
Os08g0509100	3123.62	2772.22	3161.89	1626.55	1798.23	1073.34	3019.24	1499.37	1.00931	8.97781e-07	0.000162836	OsLOX8	8	25241037	25250038	+	3272	-	- && Q84YK8.1 RecName: Full=Probable lipoxygenase 8, chloroplastic; Flags: Precursor && PF00305:Lipoxygenase	Lipoxygenase
Os01g0105400	100.169	96.4251	24.5521	323.735	325.394	258.376	73.7153	302.502	-2.03364	9.20271e-07	0.000164663	-	1	288372	292296	+	1950	-	- && Q9AWM8.1 RecName: Full=Kinesin-like protein KIN-7A; AltName: Full=NPK1-activating kinesin-like protein; Short=OsNACK; AltName: Full=Protein DWARF BAMBOO SHOOT 1 && -	-
novel.1170	57.2392	84.8184	76.8588	17.712	20.7315	23.6844	72.9721	20.7093	1.82112	9.21507e-07	0.000164663	-	9	14650683	14657371	-	6435	-	PF01536:Adenosylmethionine decarboxylase	SAM_decarbox
novel.70	494.71	298.204	248.724	837.383	744.531	945.224	347.212	842.379	-1.27856	9.40158e-07	0.00016676	-	1	6738082	6763980	-	6089	-	-	-
Os01g0109500	43.9515	48.2125	56.5766	12.792	10.8164	5.38283	49.5802	9.66375	2.34657	1.03068e-06	0.000180587	-	1	510752	512142	+	1226	-	- && - && -	-
Os12g0528801	154.341	150.887	131.301	42.3119	7.21096	4.30626	145.51	17.943	3.01804	1.03308e-06	0.000180587	-	12	20844119	20846664	-	311	-	- && - && -	-
Os10g0134033	40.8851	33.0345	28.8221	4.91999	0	0	34.2472	1.64	4.3846	1.11674e-06	0.000192421	-	10	2118909	2123738	+	1446	-	- && - && -	-
Os11g0460800	8.17702	8.03542	23.4846	186.96	148.726	27.9907	13.2324	121.225	-3.20592	1.14848e-06	0.000196489	OsSCP59	11	15683051	15694779	+	1832	-	- && Q9CAU3.1 RecName: Full=Serine carboxypeptidase-like 2; Flags: Precursor && PF00450:Serine carboxypeptidase	Peptidase_S10
Os01g0687400	1728.42	2034.75	2800.01	1002.69	1233.98	816.037	2187.73	1017.57	1.10373	1.33212e-06	0.000221701	-	1	28354882	28356067	-	1186	-	- && P36908.1 RecName: Full=Acidic endochitinase; Flags: Precursor && PF00704:Glycosyl hydrolases family 18	-
Os10g0162842	155.363	170.53	132.368	59.0399	74.8137	63.5174	152.754	65.7903	1.21471	1.34137e-06	0.000221701	-	10	4075770	4081525	+	1935	-	- && Q9LMN7.1 RecName: Full=Wall-associated receptor kinase 5; Flags: Precursor && -	-
Os10g0178500	362.855	354.451	340.527	729.143	1047.39	564.12	352.611	780.218	-1.14656	1.3418e-06	0.000221701	OsUGT98B3	10	5412580	5414295	+	1716	-	- && Q9ZQ94.1 RecName: Full=UDP-glycosyltransferase 73C5; AltName: Full=Cytokinin-O-glucosyltransferase 3; AltName: Full=Deoxynivalenol-glucosyl-transferase 1; AltName: Full=Zeatin O-glucosyltransferase 3; Short=AtZOG3 && PF00201:UDP-glucoronosyl and UDP-glucosyl transferase	UDPGT
Os05g0142100	1583.28	1548.16	2387.96	955.462	881.54	572.733	1839.8	803.245	1.19497	1.38379e-06	0.000225549	-	5	2449418	2450032	-	615	-	- && - && -	-
Os04g0454200	127.766	147.316	140.908	451.655	261.397	279.907	138.663	330.986	-1.25458	1.5117e-06	0.000244742	-	4	22744192	22748050	+	1842	-	- && Q93Y91.1 RecName: Full=Sugar transport protein 5; AltName: Full=Hexose transporter 5 && PF00083:Sugar (and other) transporter	Sugar_tr
Os01g0613800	194.204	146.423	152.65	77.7359	73.9123	59.2111	164.426	70.2864	1.22286	1.58111e-06	0.000252591	-	1	24351308	24353345	-	1383	-	- && Q7XWK5.2 RecName: Full=Senescence-specific cysteine protease SAG39; AltName: Full=Cysteine proteinase SAG39; AltName: Full=Protein SENESCENCE-ASSOCIATED GENE 39; Flags: Precursor && PF08246:Cathepsin propeptide inhibitor domain (I29)|PF00112:Papain family cysteine protease	Peptidase_C1
Os01g0103700	41.9072	45.5341	44.8343	127.92	96.4466	110.886	44.0919	111.751	-1.34015	1.76521e-06	0.000277687	-	1	191037	196287	+	3481	-	- && - && -	-
Os10g0133600	34.7523	24.9991	34.1595	70.8479	106.362	152.872	31.3036	110.027	-1.81572	1.77274e-06	0.000277687	-	10	2099188	2099823	-	636	-	- && - && -	-
Os04g0518400	1878.67	1924.04	2889.68	983.998	818.444	325.123	2230.8	709.188	1.65275	1.85564e-06	0.000286946	OsPAL07	4	25927077	25929716	-	2549	-	- && Q43210.1 RecName: Full=Phenylalanine ammonia-lyase && PF00221:Aromatic amino acid lyase	-
Os01g0839200	15.3319	27.6776	33.092	106.272	68.5041	97.9675	25.3672	90.9145	-1.84019	2.00152e-06	0.000305745	OsDSR2	1	36002559	36005000	-	1400	-	- && Q9LX14.1 RecName: Full=Protein UPSTREAM OF FLC && PF06136:Domain of unknown function (DUF966)	-
novel.615	14.3098	14.2852	26.6871	0	0	0	18.4274	0	6.66576	2.00256e-06	0.000305745	-	4	535039	537868	+	1233	-	PF05754:Domain of unknown function (DUF834)	DUF834
Os03g0233900	472.223	481.233	464.356	159.408	246.975	88.2784	472.604	164.887	1.51595	2.03922e-06	0.000307451	HB1	3	7092864	7093988	+	799	-	- && O04986.1 RecName: Full=Non-symbiotic hemoglobin 1; AltName: Full=ORYsa GLB1a; AltName: Full=rHb1 && PF00042:Globin	-
Os07g0110000	843.255	569.622	368.282	205.656	255.989	125.958	593.72	195.868	1.59831	2.09801e-06	0.00031241	-	7	548481	554208	+	5612	-	- && - && -	-
Os09g0417600	4739.61	5230.17	6518.06	2238.6	2407.56	799.888	5495.94	1815.35	1.59785	2.33834e-06	0.000340993	WRKY76	9	14976197	14977729	-	1414	-	- && Q6EPZ2.1 RecName: Full=WRKY transcription factor WRKY76; Short=OsWRKY76 && PF03106:WRKY DNA -binding domain	WRKY
Os12g0636400	109.368	106.246	102.478	43.2959	46.8712	40.9095	106.031	43.6922	1.277	2.34651e-06	0.000340993	-	12	27286553	27288661	-	1215	-	- && P34913.2 RecName: Full=Bifunctional epoxide hydrolase 2; Includes: RecName: Full=Cytosolic epoxide hydrolase 2; Short=CEH; AltName: Full=Epoxide hydratase; AltName: Full=Soluble epoxide hydrolase; Short=SEH; Includes: RecName: Full=Lipid-phosphate phosphatase && PF12697:Alpha/beta hydrolase family	-
Os10g0120300	136.965	161.601	192.147	73.7999	77.5178	59.2111	163.571	70.1763	1.21722	2.4405e-06	0.000352527	-	10	1308447	1310945	+	2499	-	- && Q9FL28.1 RecName: Full=LRR receptor-like serine/threonine-protein kinase FLS2; AltName: Full=Protein FLAGELLIN-SENSING 2; AltName: Full=Protein FLAGELLIN-SENSITIVE 2; Flags: Precursor && PF08263:Leucine rich repeat N-terminal domain|PF13855:Leucine rich repeat	LRRNT_2
Os03g0855700	623.498	1163.35	777.128	1898.13	1661.22	1890.45	854.659	1816.6	-1.08701	2.51254e-06	0.000360774	-	3	36082364	36096479	+	2413	-	- && - && -	-
Os07g0538350	128.788	141.066	147.313	60.0239	70.3068	50.5986	139.056	60.3098	1.20075	2.6365e-06	0.000376333	-	7	21167408	21167925	-	518	-	- && Q0D5R2.1 RecName: Full=Cysteine-rich receptor-like protein kinase 10; Short=Cysteine-rich RLK10; Flags: Precursor && PF01657:Salt stress response/antifungal	-
novel.382	5377.41	5421.23	10377	2299.6	3463.96	1449.06	7058.55	2404.21	1.55358	2.91936e-06	0.000414257	-	12	15970027	15973706	-	1940	-	PF02458:Transferase family	-
Os12g0635400	295.395	257.134	451.546	138.744	159.542	99.044	334.691	132.443	1.33391	3.02311e-06	0.000426471	-	12	27238568	27239382	-	815	-	- && - && PF05678:VQ motif	-
Os08g0404350	7.1549	7.1426	7.47239	41.3279	33.3507	39.8329	7.25663	38.1705	-2.39464	3.18213e-06	0.000446294	-	8	19314778	19315440	+	663	-	- && Q7X923.2 RecName: Full=FACT complex subunit SPT16; AltName: Full=Facilitates chromatin transcription complex subunit SPT16 && PF14826:FACT complex subunit SPT16 N-terminal lobe domain	-
Os11g0133001	98.1243	104.461	169.73	41.3279	49.5753	33.3735	124.105	41.4256	1.5767	3.43801e-06	0.000476639	-	11	1509884	1512419	+	2536	-	- && P17801.2 RecName: Full=Putative receptor protein kinase ZmPK1; Flags: Precursor && PF01453:D-mannose binding lectin|PF00069:Protein kinase domain|PF00954:S-locus glycoprotein domain	Pkinase
novel.832	55.1949	57.1408	24.5521	153.504	133.403	125.958	45.6293	137.622	-1.58681	3.77161e-06	0.0005199	-	6	13440577	13441921	+	1240	-	-	-
Os01g0297200	703.224	658.012	704.539	340.463	379.477	185.169	688.592	301.703	1.18856	3.97991e-06	0.000545183	-	1	10891810	10893684	+	1801	-	- && Q9FLD5.1 RecName: Full=AAA-ATPase ASD, mitochondrial; AltName: Full=AAA-ATPase 1; AltName: Full=Protein ATPASE-IN-SEED-DEVELOPMENT && PF00004:ATPase family associated with various cellular activities (AAA)|PF14363:Domain associated at C-terminal with AAA	AAA
Os06g0210200	109.368	15.178	3.20245	1882.39	2013.66	2078.85	42.5827	1991.63	-5.54798	4.00022e-06	0.000545183	-	6	5621964	5625687	+	1857	-	- && Q5RFB0.2 RecName: Full=Aminoacylase-1; Short=ACY-1; AltName: Full=N-acyl-L-amino-acid amidohydrolase && PF01546:Peptidase family M20/M25/M40	Peptidase_M20
Os11g0471300	70.5268	51.7838	54.4417	134.808	122.586	181.94	58.9174	146.445	-1.313	4.04734e-06	0.000545441	-	11	16205860	16214048	+	3667	-	- && - && -	-
Os03g0265900	64.3941	49.1054	55.5092	238.128	189.288	97.9675	56.3362	175.128	-1.6392	4.22381e-06	0.000566061	-	3	8789242	8790378	-	804	-	- && - && -	-
Os03g0195100	208.514	218.742	248.724	116.112	101.855	59.2111	225.327	92.3926	1.28221	4.32304e-06	0.000570882	OsALD1	3	4936472	4941037	+	1323	-	- && Q6VMN7.1 RecName: Full=Aminotransferase ALD1 homolog && PF00155:Aminotransferase class I and II	Aminotran_1_2
Os01g0547600	231.001	196.421	281.816	949.558	345.225	763.285	236.413	686.023	-1.53725	4.32968e-06	0.000570882	NRT2.4	1	20385993	20388511	-	1768	-	- && A2ZU80.2 RecName: Full=Probable high-affinity nitrate transporter 2.4; Short=OsNRT2.4 && PF07690:Major Facilitator Superfamily	MFS_1
Os12g0142900	53.1506	8.92825	32.0245	0	0.90137	0	31.3678	0.300457	6.47107	4.33078e-06	0.000570882	-	12	2094887	2097950	+	3064	-	- && P04323.1 RecName: Full=Retrovirus-related Pol polyprotein from transposon 17.6; Includes: RecName: Full=Protease; Includes: RecName: Full=Reverse transcriptase; Includes: RecName: Full=Endonuclease && -	-
Os09g0255400	235.089	183.029	191.08	40.3439	91.9397	22.6079	203.066	51.6305	1.96775	4.54054e-06	0.000595226	IGPS	9	4201077	4204423	-	1573	-	- && P49572.2 RecName: Full=Indole-3-glycerol phosphate synthase, chloroplastic; Short=IGPS; Flags: Precursor && PF00218:Indole-3-glycerol phosphate synthase	-
Os10g0133100	5.11064	9.82107	1.06748	25.584	51.3781	62.4408	5.33307	46.4676	-3.09108	5.1094e-06	0.000651777	OsFbox521	10	2059421	2060817	-	1397	-	- && Q9ZUB9.1 RecName: Full=Putative F-box protein At1g23770 && -	-
Os05g0131500	88.9251	46.4269	69.3865	295.199	190.189	139.954	68.2462	208.447	-1.61464	5.14053e-06	0.000651777	-	5	1846078	1848763	-	1962	-	- && B9FGV7.1 RecName: Full=Solute carrier family 40 member 3, chloroplastic; Flags: Precursor && -	-
Os08g0411000	34.7523	44.6412	24.5521	0	6.30959	2.15313	34.6486	2.82091	3.58599	5.16061e-06	0.000651777	-	8	19661984	19663477	+	1422	-	- && Q9ZUY3.1 RecName: Full=Arogenate dehydratase 3, chloroplastic; Short=AtADT3; AltName: Full=Prephenate dehydratase 1; Short=AtPDT1; Flags: Precursor && PF00800:Prephenate dehydratase	-
Os01g0293800	4.08851	2.67847	0	43.2959	18.0274	31.2204	2.25566	30.8479	-3.75132	6.00947e-06	0.000739625	-	1	10696304	10701348	+	512	-	- && - && -	-
novel.73	733.888	630.334	357.607	1561.61	1104.18	1289.73	573.943	1318.5	-1.19935	6.26069e-06	0.000758927	-	1	8250614	8263743	-	5005	-	-	-
novel.712	22.4868	22.3206	29.8895	0	2.70411	2.15313	24.899	1.61908	3.9306	7.49719e-06	0.00089532	-	4	25670330	25672090	-	1033	-	-	-
Os11g0691300	31.686	24.1063	17.0797	1.968	1.80274	1.07657	24.2907	1.61577	3.89719	7.84406e-06	0.00093213	-	11	28163572	28165364	+	1518	-	- && Q9LN59.2 RecName: Full=Putative wall-associated receptor kinase-like 11; Flags: Precursor && PF07714:Protein tyrosine kinase	Pkinase_Tyr
Os04g0401700	1864.36	1931.18	2377.29	1104.05	1159.16	606.106	2057.61	956.438	1.10457	8.66733e-06	0.00101496	HAK1	4	19886674	19892355	+	3183	-	- && Q6VVA6.2 RecName: Full=Potassium transporter 1; AltName: Full=OsHAK1 && PF02705:K+ potassium transporter	K_trans
Os06g0199100	115.5	89.2825	107.816	256.824	179.373	216.39	104.2	217.529	-1.0632	8.90269e-06	0.00103749	-	6	5027686	5035358	-	4534	-	- && Q5G1S8.2 RecName: Full=Pentatricopeptide repeat-containing protein At3g18110, chloroplastic; AltName: Full=Protein EMBRYO DEFECTIVE 1270; Flags: Precursor && PF01535:PPR repeat|PF13041:PPR repeat family|PF12854:PPR repeat	PPR
Os10g0491400	509.02	640.155	406.711	243.048	260.496	127.035	518.629	210.193	1.30158	9.1871e-06	0.00106548	-	10	18656488	18657276	+	594	-	- && - && -	-
Os11g0491600	23.5089	24.1063	17.0797	0.983998	0	0	21.565	0.327999	5.93543	9.82527e-06	0.00113404	-	11	17384670	17387292	-	2623	-	- && - && -	-
Os09g0268000	170.695	171.422	226.307	72.8159	93.7424	99.044	189.475	88.5341	1.09707	1.00186e-05	0.0011454	-	9	5120497	5122573	-	2077	-	- && O80939.1 RecName: Full=L-type lectin-domain containing receptor kinase IV.1; Short=Arabidopsis thaliana lectin-receptor kinase e; Short=AthlecRK-e; Short=LecRK-IV.1; AltName: Full=Lectin Receptor Kinase 1; Flags: Precursor && PF00069:Protein kinase domain|PF00139:Legume lectin domain	Pkinase
Os05g0217800	916.849	716.046	1244.69	3259.99	1283.55	4084.49	959.194	2876.01	-1.58427	1.05085e-05	0.00118456	OsBURP02	5	7255510	7257163	+	1391	-	- && Q6I5W0.1 RecName: Full=BURP domain-containing protein 2; Short=OsBURP02; Flags: Precursor && PF03181:BURP domain	-
Os01g0821600	1373.74	1458.88	1553.19	827.543	872.526	482.301	1461.93	727.457	1.00609	1.11017e-05	0.00123419	OsWRKY21	1	35062738	35064472	+	1521	-	- && - && PF03106:WRKY DNA -binding domain	WRKY
Os05g0322900	6406.7	6817.61	6261.86	3652.6	3534.27	1745.11	6495.39	2977.33	1.12523	1.21492e-05	0.00133523	WRKY45	5	14991579	14993673	+	1708	-	- && Q9SHB5.1 RecName: Full=WRKY transcription factor 55; AltName: Full=WRKY DNA-binding protein 55 && PF03106:WRKY DNA -binding domain	WRKY
Os01g0864200	223.846	231.242	281.816	128.904	133.403	83.9721	245.634	115.426	1.0855	1.21772e-05	0.00133523	-	1	37403082	37403883	+	802	-	- && - && -	-
Os12g0217800	599.989	627.656	831.57	367.031	184.781	101.197	686.405	217.67	1.656	1.26362e-05	0.00137308	-	12	6259242	6259953	-	712	-	- && - && -	-
Os02g0632900	156.386	166.065	196.417	88.5598	81.1233	48.4454	172.956	72.7095	1.24541	1.2894e-05	0.00138858	OsWAK15	2	25356937	25360011	-	2646	-	- && Q9LMN7.1 RecName: Full=Wall-associated receptor kinase 5; Flags: Precursor && -	-
Os11g0559600	170.695	141.066	134.503	275.52	283.03	542.589	148.755	367.046	-1.30182	1.33233e-05	0.00141886	-	11	20832524	20835844	-	2431	-	- && - && -	-
Os10g0562900	303.572	352.666	443.006	197.784	198.301	132.418	366.415	176.168	1.054	1.34557e-05	0.00141886	DERF12	10	22213939	22214320	+	382	-	- && - && -	-
Os07g0687100	23.5089	38.3915	58.7116	278.472	201.907	66.7471	40.204	182.375	-2.18419	1.34692e-05	0.00141886	-	7	29195074	29197462	-	1103	-	- && P36591.2 RecName: Full=Dihydrofolate reductase && PF03959:Serine hydrolase (FSH1)	-
Os12g0161100	39.863	37.4986	51.2392	12.792	9.0137	8.61252	42.867	10.1394	2.07678	1.35471e-05	0.00141947	OsPUB37	12	3068752	3070072	+	1321	-	- && Q9SF15.1 RecName: Full=E3 ubiquitin-protein ligase PUB24; AltName: Full=Plant U-box protein 24; AltName: Full=U-box domain-containing protein 24 && PF04564:U-box domain	U-box
novel.696	61.3277	51.7838	135.57	303.071	284.833	184.093	82.894	257.332	-1.6392	1.35927e-05	0.00141947	-	4	16213636	16219609	-	2200	-	PF03936:Terpene synthase family, metal binding domain|PF01397:Terpene synthase, N-terminal domain	-
Os02g0540700	300.506	281.24	345.865	186.96	157.74	115.193	309.203	153.297	1.00957	1.38899e-05	0.00144425	OsPUB45	2	20082159	20083676	+	1518	-	- && Q9FLF4.1 RecName: Full=U-box domain-containing protein 27; AltName: Full=Plant U-box protein 27 && PF04564:U-box domain	U-box
Os10g0536400	2703.53	2456.16	3127.73	1334.3	1522.41	627.638	2762.47	1161.45	1.2495	1.50494e-05	0.00155144	OsF3H-2	10	20886407	20892109	+	1004	-	- && Q9FLV0.1 RecName: Full=Protein DOWNY MILDEW RESISTANCE 6; Short=AtDMR6; AltName: Full=2-oxoglutarate (2OG)-Fe(II) oxygenase-like protein DMR6; AltName: Full=Salicylate 3-hydroxylase DMR6; Short=S3H DMR6; Short=SA 3-hydroxylase DMR6; Short=Salicylic acid 3-hydroxylase DMR6 && PF14226:non-haem dioxygenase in morphine synthesis N-terminal	-
Os11g0702400	114.478	82.1399	101.411	27.552	47.7726	33.3735	99.3431	36.2327	1.44851	1.54386e-05	0.00157807	-	11	28766270	28766937	-	668	-	- && Q681X4.1 RecName: Full=Zinc finger protein ZAT5 && PF13912:C2H2-type zinc finger	-
Os01g0821300	229.979	266.062	271.141	142.68	87.4329	52.7517	255.727	94.2881	1.43742	1.5665e-05	0.00159324	OsWRKY108	1	35032858	35033657	-	800	-	- && - && -	-
Os05g0142900	120.611	129.46	190.012	39.3599	73.0109	31.2204	146.694	47.8638	1.60772	1.5719e-05	0.00159324	-	5	2477904	2478474	-	571	-	- && - && -	-
Os07g0524900	399.652	341.952	250.859	173.184	150.529	88.2784	330.821	137.33	1.26655	1.62314e-05	0.00163829	-	7	20365632	20367832	-	1498	-	- && Q9FGG3.1 RecName: Full=WAT1-related protein At5g64700 && PF00892:EamA-like transporter family	DUF6
Os03g0335200	338.324	342.845	294.626	178.104	175.767	99.044	325.265	150.972	1.10478	1.63001e-05	0.00163836	OsWRKY79	3	12394575	12396889	+	1475	-	- && Q9LY00.1 RecName: Full=Probable WRKY transcription factor 70; AltName: Full=WRKY DNA-binding protein 70 && -	-
novel.1041	0	0.892825	0	34.4399	13.5205	17.225	0.297608	21.7285	-5.93429	1.75864e-05	0.00175304	-	8	11639855	11642165	+	1179	-	-	-
Os03g0709300	1153.98	1280.31	1464.59	694.703	708.477	339.118	1299.63	580.766	1.16113	1.77196e-05	0.00175906	OsUCL9	3	28604458	28606325	-	751	-	- && P60496.1 RecName: Full=Chemocyanin; AltName: Full=Basic blue protein; AltName: Full=Plantacyanin; Flags: Precursor && PF02298:Plastocyanin-like domain	Cu_bind_like
Os12g0512800	74.6153	45.5341	54.4417	15.744	16.2247	19.3782	58.197	17.1156	1.76677	1.8267e-05	0.00179859	OsCYP71E5	12	19848833	19851543	-	1909	-	- && O48958.1 RecName: Full=4-hydroxyphenylacetaldehyde oxime monooxygenase; AltName: Full=Cytochrome P450 71E1 && PF00067:Cytochrome P450	p450
Os05g0102000	1040.53	1238.35	2168.06	695.687	715.687	436.009	1482.31	615.794	1.26662	1.95959e-05	0.00188996	OsJMT1	5	116433	118268	-	1836	-	- && Q9SPV4.1 RecName: Full=Salicylate carboxymethyltransferase; AltName: Full=S-adenosyl-L-methionine:salicylate acid carboxylmethyltransferase; Short=CbSAMT; AltName: Full=Salicylate O-methyltransferase && PF03492:SAM dependent carboxyl methyltransferase	-
novel.355	426.227	399.093	439.803	152.52	235.257	77.5127	421.708	155.097	1.43968	1.99123e-05	0.00190166	-	12	836308	839144	-	1641	-	PF03106:WRKY DNA -binding domain	WRKY
Os04g0288500	377.165	430.342	473.963	202.704	252.384	122.728	427.157	192.605	1.14627	1.99445e-05	0.00190166	-	4	12534295	12539647	-	2405	-	- && Q9LXA5.1 RecName: Full=L-type lectin-domain containing receptor kinase IX.1; Short=LecRK-IX.1; Flags: Precursor && PF00069:Protein kinase domain|PF00139:Legume lectin domain	Pkinase
Os04g0179200	126.744	88.3897	161.19	29.5199	59.4904	24.761	125.441	37.9238	1.71617	2.23133e-05	0.00210259	OsMAS	4	5385722	5387215	-	1264	-	- && Q7FAE1.1 RecName: Full=Momilactone A synthase; Short=OsMAS && PF00106:short chain dehydrogenase	adh_short
Os08g0485000	1589.41	1776.72	2796.81	933.814	1206.03	716.993	2054.31	952.28	1.10858	2.34162e-05	0.00218942	-	8	23969407	23970640	-	921	-	- && Q9FE06.1 RecName: Full=Protein EXORDIUM-like 2; Flags: Precursor && PF04674:Phosphate-induced protein 1 conserved region	-
novel.57	27.5975	26.7847	27.7546	65.9279	65.8	106.58	27.3789	79.4359	-1.53396	2.38216e-05	0.00221019	-	1	42390000	42392425	+	2330	-	PF02721:Domain of unknown function DUF223	-
Os01g0793300	2117.85	2365.09	3735.13	1066.65	1600.83	720.222	2739.36	1129.24	1.27796	2.46833e-05	0.00227265	-	1	33601018	33605323	-	2888	-	- && P43309.1 RecName: Full=Polyphenol oxidase, chloroplastic; Short=PPO; AltName: Full=Catechol oxidase; Flags: Precursor && -	-
Os12g0218800	322.992	316.06	505.987	214.512	85.6301	90.4315	381.68	130.191	1.55126	2.48528e-05	0.00227865	-	12	6354156	6354747	+	592	-	- && - && -	-
Os05g0142200	254.51	260.705	370.417	142.68	119.882	50.5986	295.211	104.387	1.49639	2.49374e-05	0.00227865	-	5	2452663	2453318	-	656	-	- && - && -	-
Os05g0584900	95.0579	75.8901	109.951	39.3599	32.4493	13.9954	93.633	28.6015	1.70196	2.6241e-05	0.00238872	SLAC	5	29119644	29121883	+	2240	-	- && Q9ASQ7.1 RecName: Full=S-type anion channel SLAH2; AltName: Full=SLAC1-homolog protein 2 && -	-
Os07g0691300	1379.87	1645.48	1901.19	733.079	1074.43	535.053	1642.18	780.855	1.07166	2.74884e-05	0.00248353	-	7	29404417	29405293	+	877	-	- && P20144.1 RecName: Full=Wound-induced protein 1 && PF07107:Wound-induced protein WI12	-
Os07g0413800	9075.47	8732.72	15640.8	6446.17	4434.74	5323.62	11149.7	5401.51	1.04555	2.7956e-05	0.00249772	-	7	13037553	13038640	-	1088	-	- && Q9XIP8.1 RecName: Full=Protein CDI; AltName: Full=Protein CADMIUM INDUCED && -	-
Os05g0369300	106.301	88.3897	131.301	39.3599	54.0822	31.2204	108.664	41.5542	1.37826	2.92074e-05	0.00257142	OsEXO70FX2	5	17751476	17753311	+	1836	-	- && - && PF03081:Exo70 exocyst complex subunit	Exo70
Os12g0471100	250.421	272.312	452.613	120.048	153.233	53.8283	325.115	109.036	1.57221	2.96212e-05	0.00259837	-	12	16909020	16910848	+	1829	-	- && Q9FLD5.1 RecName: Full=AAA-ATPase ASD, mitochondrial; AltName: Full=AAA-ATPase 1; AltName: Full=Protein ATPASE-IN-SEED-DEVELOPMENT && PF14363:Domain associated at C-terminal with AAA|PF00004:ATPase family associated with various cellular activities (AAA)	AAA
Os10g0536450	1836.76	1792.79	1992.99	952.51	1123.11	489.837	1874.18	855.151	1.13128	2.97817e-05	0.00260299	-	10	20890567	20891707	-	571	-	- && Q9FLV0.1 RecName: Full=Protein DOWNY MILDEW RESISTANCE 6; Short=AtDMR6; AltName: Full=2-oxoglutarate (2OG)-Fe(II) oxygenase-like protein DMR6; AltName: Full=Salicylate 3-hydroxylase DMR6; Short=S3H DMR6; Short=SA 3-hydroxylase DMR6; Short=Salicylic acid 3-hydroxylase DMR6 && PF03171:2OG-Fe(II) oxygenase superfamily	2OG-FeII_Oxy
Os12g0174700	1752.95	1694.58	2428.53	983.998	1044.69	446.775	1958.69	825.153	1.24647	3.20126e-05	0.002758	-	12	3789999	3790567	+	569	-	- && Q9FI66.1 RecName: Full=Dirigent protein 3; Short=AtDIR3; Flags: Precursor && PF03018:Dirigent-like protein	-
novel.1117	61.3277	33.9273	34.1595	100.368	145.121	104.427	43.1382	116.638	-1.43882	3.23353e-05	0.00277589	-	9	4049754	4052581	+	1577	-	-	-
novel.575	6.13277	11.6067	17.0797	50.1839	45.9699	43.0626	11.6064	46.4055	-2.00406	3.36065e-05	0.00286463	-	3	10706953	10713322	-	1550	-	PF00249:Myb-like DNA-binding domain|PF06640:P protein C-terminus	P_C
Os09g0542600	8.17702	10.7139	32.0245	156.456	124.389	32.297	16.9718	104.381	-2.62994	3.56303e-05	0.00299481	-	9	21370810	21372435	-	817	-	- && Q8GT74.1 RecName: Full=NEP1-interacting protein 2; AltName: Full=RING-H2 finger protein ATL25 && PF13639:Ring finger domain	-
Os10g0135700	0	0	0	11.808	19.8301	7.53596	0	13.058	-6.16679	3.63802e-05	0.00304722	-	10	2211559	2212224	-	666	-	- && - && -	-
Os05g0546300	5438.74	6278.34	9948.95	3761.83	4114.75	2845.36	7222.01	3573.98	1.01472	3.69365e-05	0.00308311	-	5	27119121	27120202	+	1082	-	- && - && -	-
Os04g0604250	113.456	111.603	70.4539	222.384	173.063	246.533	98.5044	213.993	-1.11532	3.7369e-05	0.00310846	-	4	30477844	30478399	-	481	-	- && - && -	-
Os12g0218300	1342.05	1348.17	1815.79	747.839	875.23	390.793	1502	671.287	1.16097	3.80243e-05	0.0031521	OsRALF-34	12	6324997	6325660	+	664	-	- && - && -	-
Os05g0161500	521.285	268.74	882.809	2323.22	1498.08	1129.32	557.612	1650.2	-1.56614	4.00509e-05	0.00328622	-	5	3626394	3629080	+	2062	-	- && Q6ATB2.1 RecName: Full=Probable GTP diphosphokinase CRSH2, chloroplastic; AltName: Full=Calcium-activated RelA/Spot homolog 2; Short=OsCRSH2; AltName: Full=ppGpp synthetase CRSH2; Flags: Precursor && PF04607:Region found in RelA / SpoT proteins|PF13328:HD domain|PF13499:EF-hand domain pair	-
Os01g0511000	1145.81	1041.93	1925.74	545.135	597.608	802.041	1371.16	648.261	1.08081	4.05068e-05	0.00331166	-	1	17975866	17977327	-	1415	-	- && Q9ZW96.1 RecName: Full=LOB domain-containing protein 40; AltName: Full=ASYMMETRIC LEAVES 2-like protein 37; Short=AS2-like protein 37 && PF03195:Protein of unknown function DUF260	-
Os04g0554200	26.5753	17.8565	28.8221	138.744	90.137	45.2157	24.418	91.3655	-1.91038	4.20598e-05	0.00337242	-	4	27732744	27735793	+	1759	-	- && Q84WW5.1 RecName: Full=Vesicle-associated protein 1-3; AltName: Full=Plant VAP homolog 13; Short=AtPVA13; AltName: Full=VAMP-associated protein 1-3; Contains: RecName: Full=Vesicle-associated protein 1-3, N-terminally processed && PF00635:MSP (Major sperm protein) domain	Motile_Sperm
Os02g0658800	95.0579	53.5695	115.288	277.488	133.403	612.566	87.9719	341.152	-1.95631	4.47107e-05	0.00353625	OsEXPB11	2	26648837	26650582	+	1378	-	- && Q6H676.1 RecName: Full=Expansin-B11; AltName: Full=Beta-expansin-11; AltName: Full=OsEXPB11; AltName: Full=OsaEXPb1.20; Flags: Precursor && PF01357:Pollen allergen|PF03330:Rare lipoprotein A (RlpA)-like double-psi beta-barrel	-
Os04g0556400	77.6817	82.1399	103.546	38.3759	36.0548	18.3016	87.7892	30.9108	1.49758	4.5664e-05	0.00359984	-	4	27843255	27845708	-	2454	-	- && Q6JAH0.1 RecName: Full=Putative cis-zeatin O-glucosyltransferase && PF00201:UDP-glucoronosyl and UDP-glucosyl transferase	UDPGT
Os04g0684900	1114.12	1178.53	1705.84	830.495	658.901	459.693	1332.83	649.696	1.03599	4.64381e-05	0.00364894	OsCAF1B	4	34980601	34981819	+	1219	-	- && Q9FMS6.1 RecName: Full=Probable CCR4-associated factor 1 homolog 11 && PF04857:CAF1 family ribonuclease	CAF1
novel.364	9.19915	8.92825	6.4049	18.696	75.7151	48.4454	8.17743	47.6188	-2.54006	4.68487e-05	0.00365312	-	12	5503987	5506021	-	2035	-	PF00931:NB-ARC domain	NB-ARC
novel.569	160.474	147.316	124.896	317.831	211.822	397.253	144.229	308.969	-1.09695	4.74601e-05	0.00367064	-	3	6630379	6634749	-	3071	-	-	-
Os03g0283400	52.1285	44.6412	38.4294	137.76	91.9397	95.8143	45.0664	108.505	-1.26676	4.7475e-05	0.00367064	-	3	9725291	9727472	-	1325	-	- && - && -	-
Os03g0776400	163.54	164.28	210.294	103.32	82.926	58.1345	179.372	81.4601	1.13511	4.79276e-05	0.00368203	-	3	32193639	32195091	-	1453	-	- && - && -	-
Os01g0508500	1622.12	1960.64	1512.62	812.783	964.466	361.726	1698.46	712.991	1.25165	5.11856e-05	0.00385859	RH2	1	17798266	17799004	+	739	-	- && Q5QM06.1 RecName: Full=NRR repressor homolog 2 && PF15699:NPR1 interacting	-
Os04g0368000	97.1021	88.3897	106.748	46.2479	46.8712	32.297	97.4134	41.8054	1.21412	5.17634e-05	0.00388119	OsWAK43	4	17874313	17877280	-	2541	-	- && Q9S9M3.2 RecName: Full=Wall-associated receptor kinase-like 3; Flags: Precursor && PF00069:Protein kinase domain|PF13947:Wall-associated receptor kinase galacturonan-binding	Pkinase
Os12g0135850	42.9294	50.891	57.6441	19.68	14.4219	9.68909	50.4882	14.597	1.78405	5.19734e-05	0.00388119	-	12	1746567	1747175	+	609	-	- && - && PF02365:No apical meristem (NAM) protein	NAM
Os11g0645200	43.9515	37.4986	35.227	113.16	100.953	72.1299	38.8924	95.4144	-1.29687	5.21289e-05	0.00388119	-	11	25614690	25617362	+	1257	-	- && P0A9T4.1 RecName: Full=Protein tas >P0A9T5.1 RecName: Full=Protein tas && PF00248:Aldo/keto reductase family	Aldo_ket_red
Os07g0242400	1.02213	6.24977	10.6748	38.3759	41.463	30.1438	5.98225	36.6609	-2.62307	5.2774e-05	0.00390511	OsFbox356	7	7938936	7941316	-	1645	-	- && Q3EBI7.1 RecName: Full=F-box protein At2g40910 && PF00646:F-box domain	F-box
Os10g0517500	2230.28	2584.73	3777.83	979.078	1663.03	513.522	2864.28	1051.88	1.44469	5.41891e-05	0.00399757	RRJ1	10	20001168	20004598	-	1702	-	- && Q9SGU9.1 RecName: Full=Methionine gamma-lyase; Short=AtMGL; AltName: Full=L-methioninase && PF01053:Cys/Met metabolism PLP-dependent enzyme	Cys_Met_Meta_PP
Os03g0399900	13.2877	17.8565	14.9448	59.0399	41.463	49.522	15.363	50.0083	-1.69674	5.52237e-05	0.00406147	-	3	16214470	16215417	+	822	-	- && - && -	-
Os03g0317300	126.744	116.067	152.65	57.0719	73.9123	52.7517	131.82	61.2453	1.10017	5.57054e-05	0.00408444	-	3	11422308	11423805	+	1498	-	- && Q766C3.1 RecName: Full=Aspartic proteinase nepenthesin-1; AltName: Full=Nepenthesin-I; Flags: Precursor && PF14541:Xylanase inhibitor C-terminal|PF14543:Xylanase inhibitor N-terminal	-
Os06g0530600	170.695	156.244	161.19	100.368	61.2931	51.6751	162.71	71.112	1.19257	5.58828e-05	0.00408503	OsVQ22	6	19780992	19781426	+	435	-	- && - && PF05678:VQ motif	-
Os01g0720400	324.015	307.132	432.331	207.624	189.288	122.728	354.492	173.213	1.03044	5.68417e-05	0.00413373	OsACP1	1	30025366	30026465	-	1100	-	- && Q9FZ62.1 RecName: Full=Inorganic pyrophosphatase 2; Short=AtPPsPase2; Short=PPi phosphatase 2; Short=Pyrophosphate-specific phosphatase 2 && PF06888:Putative Phosphatase	-
Os06g0178601	3.06638	4.46412	6.4049	71.8319	5.40822	78.5893	4.64514	51.9431	-3.48413	5.76088e-05	0.00416077	-	6	3896429	3898528	-	1438	-	- && Q07512.1 RecName: Full=Flavonol synthase/flavanone 3-hydroxylase; Short=FLS && PF03171:2OG-Fe(II) oxygenase superfamily	2OG-FeII_Oxy
Os11g0235700	1.02213	0	0	4.91999	21.6329	38.7564	0.340709	21.7697	-5.93502	5.81782e-05	0.00418935	-	11	7221675	7228567	+	375	-	- && - && -	-
Os03g0844000	83.8145	83.0327	62.9816	208.608	144.219	141.03	76.6096	164.619	-1.10165	6.03078e-05	0.00431693	-	3	35474092	35479958	+	4632	-	- && Q9SVP7.2 RecName: Full=Pentatricopeptide repeat-containing protein At4g13650 && -	-
Os03g0730500	9.19915	8.92825	9.60736	132.84	78.4192	9.68909	9.24492	73.6493	-2.99623	6.05873e-05	0.0043241	OsSCP20	3	29871085	29878399	+	3050	-	- && Q9C7Z9.2 RecName: Full=Serine carboxypeptidase-like 18; Flags: Precursor && PF00450:Serine carboxypeptidase	Peptidase_S10
Os03g0236200	241.222	199.993	283.951	128.904	127.093	69.9768	241.722	108.658	1.14916	6.18117e-05	0.00439848	OsGAD3	3	7181080	7184036	+	2017	-	- && Q42521.2 RecName: Full=Glutamate decarboxylase 1; Short=GAD 1 && PF00282:Pyridoxal-dependent decarboxylase conserved domain	-
novel.1047	15.3319	8.03542	54.4417	0	0.90137	1.07657	25.9363	0.659312	5.30122	6.24107e-05	0.00442804	-	8	14516666	14520956	+	1371	-	-	-
Os04g0249600	289.262	237.491	111.018	68.8799	91.9397	76.4361	212.591	79.0852	1.42649	6.49937e-05	0.00453574	STR6	4	9671368	9674023	-	1891	-	- && Q8RUD6.1 RecName: Full=Rhodanese-like domain-containing protein 19, mitochondrial; AltName: Full=Sulfurtransferase 19; Short=AtStr19; Flags: Precursor && PF00581:Rhodanese-like domain	Rhodanese
Os11g0156600	85.8587	100.889	170.797	41.3279	53.1808	25.8376	119.182	40.1154	1.56337	6.50568e-05	0.00453574	-	11	2683005	2684962	+	465	-	- && Q8GXE9.2 RecName: Full=HVA22-like protein j; Short=AtHVA22j && PF03134:TB2/DP1, HVA22 family	TB2_DP1_HVA22
Os07g0129800	39.863	33.0345	70.4539	4.91999	16.2247	6.45939	47.7838	9.20135	2.35762	6.70036e-05	0.00464462	-	7	1575296	1579565	-	2570	-	- && O80939.1 RecName: Full=L-type lectin-domain containing receptor kinase IV.1; Short=Arabidopsis thaliana lectin-receptor kinase e; Short=AthlecRK-e; Short=LecRK-IV.1; AltName: Full=Lectin Receptor Kinase 1; Flags: Precursor && PF00139:Legume lectin domain|PF00069:Protein kinase domain	Pkinase
Os02g0554100	145.142	203.564	224.172	482.159	361.449	305.745	190.959	383.118	-1.00487	6.81161e-05	0.00470821	-	2	20913876	20919054	+	1691	-	- && Q9FN03.1 RecName: Full=Ultraviolet-B receptor UVR8; AltName: Full=Protein UV-B RESISTANCE 8; AltName: Full=RCC1 domain-containing protein UVR8 && PF00415:Regulator of chromosome condensation (RCC1) repeat	-
Os01g0696800	104.257	122.317	194.282	56.0879	54.9835	64.5939	140.285	58.5551	1.26031	6.87367e-05	0.00473117	-	1	28835243	28836884	+	1642	-	- && Q766C3.1 RecName: Full=Aspartic proteinase nepenthesin-1; AltName: Full=Nepenthesin-I; Flags: Precursor && PF14543:Xylanase inhibitor N-terminal|PF14541:Xylanase inhibitor C-terminal	-
Os10g0344000	124.7	121.424	116.356	29.5199	68.5041	27.9907	120.827	42.0049	1.51596	6.90208e-05	0.00473117	-	10	10231802	10234439	-	1782	-	- && Q9FHB6.1 RecName: Full=Protein DETOXIFICATION 16; Short=AtDTX16; AltName: Full=Multidrug and toxic compound extrusion protein 16; Short=MATE protein 16 && -	-
Os02g0682300	199.315	182.136	235.914	116.112	112.671	72.1299	205.788	100.304	1.03232	6.93697e-05	0.00473117	DHS	2	27887212	27888250	-	1039	-	- && Q9FHG8.1 RecName: Full=Putative RING-H2 finger protein ATL50; AltName: Full=RING-type E3 ubiquitin transferase ATL50 && PF13639:Ring finger domain	-
novel.1063	177.85	162.494	169.73	90.5278	82.0246	39.8329	170.025	70.7951	1.25908	7.07726e-05	0.00479564	-	8	24142944	24149348	+	2002	-	PF00201:UDP-glucoronosyl and UDP-glucosyl transferase	UDPGT
Os03g0118600	125.722	76.7829	97.141	266.664	177.57	197.011	99.8819	213.748	-1.09974	7.21323e-05	0.00482615	-	3	1004328	1007269	+	1536	-	- && Q9FJ82.1 RecName: Full=Dihydrodipicolinate reductase-like protein CRR1, chloroplastic; AltName: Full=4-hydroxy-tetrahydrodipicolinate reductase 3; Short=HTPA reductase 3; AltName: Full=Protein CHLORORESPIRATORY REDUCTION 1; Flags: Precursor && PF05173:Dihydrodipicolinate reductase, C-terminus|PF01113:Dihydrodipicolinate reductase, N-terminus	DapB_N
Os09g0555150	13.2877	14.2852	24.5521	120.048	91.9397	27.9907	17.375	79.9927	-2.20968	7.6398e-05	0.00504918	-	9	22013784	22015249	+	1466	-	- && Q9M1V2.1 RecName: Full=Cytosolic sulfotransferase 5; Short=AtSOT5; AltName: Full=Flavonoid 7-sulfotransferase 3a; Short=AtST3a && PF00685:Sulfotransferase domain	Sulfotransfer_1
novel.1064	2.04426	0	0	20.664	14.4219	23.6844	0.681419	19.5901	-4.88128	7.66233e-05	0.00505023	-	8	24812870	24813889	+	930	-	PF13359:DDE superfamily endonuclease	-
Os09g0448200	2298.77	2676.69	3239.81	1201.46	1436.78	412.325	2738.42	1016.86	1.42876	7.71953e-05	0.00506028	OsHAK17	9	16754535	16759622	+	2776	-	- && Q67UC7.2 RecName: Full=Probable potassium transporter 17; AltName: Full=OsHAK17 && PF02705:K+ potassium transporter	K_trans
Os07g0122000	18.3983	35.713	18.1472	0.983998	4.50685	0	24.0862	1.83028	3.6601	7.90977e-05	0.00512923	-	7	1150138	1152196	+	1976	-	- && - && PF08224:Domain of unknown function (DUF1719)	-
Os08g0359100	445.648	468.733	391.767	134.808	268.608	233.615	435.382	212.344	1.03564	8.10831e-05	0.00522386	-	8	16513780	16517887	-	1377	-	- && Q9XI60.1 RecName: Full=Lipid phosphate phosphatase 2; Short=AtLPP2; AltName: Full=Phosphatidic acid phosphatase 2; Short=AtPAP2; AltName: Full=Prenyl diphosphate phosphatase && PF01569:PAP2 superfamily	-
Os08g0410950	37.8187	43.7484	25.6196	0	8.11233	0	35.7289	2.70411	3.66942	8.14232e-05	0.00522386	-	8	19657861	19659417	+	1557	-	- && - && -	-
Os05g0368000	1458.58	1517.8	1447.51	681.911	703.068	187.322	1474.63	524.101	1.49168	8.51947e-05	0.00540727	RH1	5	17670727	17671568	+	434	-	- && - && -	-
Os11g0229500	117.545	94.6394	159.055	57.0719	44.1671	18.3016	123.746	39.8469	1.62808	8.56273e-05	0.0054073	RPR1*	11	6888365	6896307	+	3068	-	- && Q9STE7.1 RecName: Full=Putative disease resistance RPP13-like protein 3 && PF00931:NB-ARC domain	NB-ARC
Os05g0571200	353.656	283.918	248.724	159.408	163.148	86.1252	295.433	136.227	1.11395	9.20517e-05	0.00575276	OsWRKY19	5	28471802	28473050	+	1036	-	- && Q9SUP6.1 RecName: Full=Probable WRKY transcription factor 53; AltName: Full=WRKY DNA-binding protein 53 && PF03106:WRKY DNA -binding domain	WRKY
Os10g0530500	718.556	417.842	747.239	1387.44	960.86	1418.91	627.879	1255.74	-1.00056	9.29532e-05	0.00577915	OsGSTU13	10	20622453	20623389	-	844	-	- && Q06398.2 RecName: Full=Probable glutathione S-transferase GSTU6; AltName: Full=28 kDa cold-induced protein && PF02798:Glutathione S-transferase, N-terminal domain|PF00043:Glutathione S-transferase, C-terminal domain	GST_N
Os08g0393600	5.11064	4.46412	13.8773	85.6079	60.3918	15.0719	7.81735	53.6905	-2.79543	9.4568e-05	0.00579001	-	8	18676001	18678475	+	1720	-	- && Q7XSZ4.2 RecName: Full=Very-long-chain (3R)-3-hydroxyacyl-CoA dehydratase PASTICCINO 2A; AltName: Full=3-hydroxyacyl-CoA dehydratase PASTICCINO 2A; Short=HACD; Short=PAS2A; AltName: Full=Protein tyrosine phosphatase-like protein && -	-
Os01g0550600	8.17702	6.24977	4.26994	30.5039	29.7452	27.9907	6.23224	29.4133	-2.23558	9.52255e-05	0.00580101	-	1	20628587	20631077	+	2310	-	- && - && -	-
Os03g0226400	216.691	205.35	186.81	424.103	274.918	530.747	202.95	409.923	-1.01263	9.52287e-05	0.00580101	OsMTP8.1	3	6636675	6641550	+	2104	-	- && Q10PP8.1 RecName: Full=Metal tolerance protein 4; Short=OsMTP4 && PF16916:Dimerisation domain of Zinc Transporter|PF01545:Cation efflux family	-
Os11g0668100	1.02213	0.892825	0	0	74.8137	48.4454	0.638318	41.0864	-5.98009	9.80088e-05	0.00595051	-	11	26953151	26960443	-	2848	-	- && Q9LRR4.1 RecName: Full=Putative disease resistance RPP13-like protein 1 && -	-
Os01g0365000	120.611	141.959	96.0736	54.1199	60.3918	54.9048	119.548	56.4722	1.0834	9.92704e-05	0.00600176	-	1	14903885	14915751	-	2784	-	- && Q9LMN7.1 RecName: Full=Wall-associated receptor kinase 5; Flags: Precursor && PF00069:Protein kinase domain|PF13947:Wall-associated receptor kinase galacturonan-binding	Pkinase
Os01g0839900	1.02213	8.03542	50.1717	0	0	0	19.7431	0	6.76519	9.99902e-05	0.00601512	-	1	36029895	36030895	-	1001	-	- && Q41350.1 RecName: Full=Osmotin-like protein; Flags: Precursor && PF00314:Thaumatin family	Thaumatin
Os06g0671000	26.5753	27.6776	33.092	74.7839	63.9972	73.2065	29.115	70.6625	-1.28041	0.000100464	0.00602859	OsHAK13	6	27819964	27827289	+	2750	-	- && Q652J4.1 RecName: Full=Probable potassium transporter 13; AltName: Full=OsHAK13 && PF02705:K+ potassium transporter	K_trans
Os03g0283200	91.9915	82.1399	134.503	223.368	168.556	320.817	102.878	237.58	-1.20836	0.000104388	0.00618712	OsGSTL1	3	9717253	9719884	-	1045	-	- && Q10N44.1 RecName: Full=Protein IN2-1 homolog A && PF13410:Glutathione S-transferase, C-terminal domain|PF13417:Glutathione S-transferase, N-terminal domain	-
Os08g0524400	265.753	290.168	558.294	172.2	120.784	41.9861	371.405	111.656	1.73158	0.000108248	0.00635258	-	8	26086563	26087515	+	953	-	- && Q94BT2.3 RecName: Full=Auxin-induced in root cultures protein 12; Flags: Precursor && PF04526:Protein of unknown function (DUF568)	-
Os02g0815200	401.696	298.204	620.208	1080.43	797.712	841.874	440.036	906.672	-1.04417	0.000109365	0.00638793	-	2	34922504	34924759	+	1331	-	- && P19684.1 RecName: Full=33 kDa ribonucleoprotein, chloroplastic; Flags: Precursor && PF00076:RNA recognition motif. (a.k.a. RRM, RBD, or RNP domain)	RRM_1
novel.1193	6.13277	0.892825	4.26994	90.5278	52.2794	4.30626	3.76518	49.0378	-3.72227	0.000111522	0.00648873	-	AP008246	198406	203297	-	1522	-	-	-
novel.354	603.055	772.294	925.509	381.791	418.236	162.561	766.953	320.863	1.25574	0.000113002	0.00654209	-	12	789079	791274	-	1925	-	PF03106:WRKY DNA -binding domain	WRKY
Os12g0116700	371.032	388.379	329.853	151.536	212.723	69.9768	363.088	144.745	1.32371	0.000113089	0.00654209	OsWRKY64	12	824221	825793	-	1193	-	- && Q9LY00.1 RecName: Full=Probable WRKY transcription factor 70; AltName: Full=WRKY DNA-binding protein 70 && PF03106:WRKY DNA -binding domain	WRKY
Os04g0111100	314.815	337.488	359.742	180.072	201.907	94.7378	337.348	158.905	1.08292	0.0001141	0.00658478	-	4	639804	643247	-	3318	-	- && Q9LRR4.1 RecName: Full=Putative disease resistance RPP13-like protein 1 && PF00931:NB-ARC domain	NB-ARC
Os04g0400600	6.13277	2.67847	7.47239	38.3759	18.0274	36.6032	5.42788	31.0022	-2.53007	0.000118559	0.00678082	-	4	19819412	19820288	-	877	-	- && - && -	-
Os08g0411800	73.5932	70.5332	71.5214	151.536	112.671	179.786	71.8826	147.998	-1.0395	0.000118815	0.00678082	-	8	19699180	19703231	+	4052	-	- && - && -	-
Os09g0451000	27.5975	12.4995	28.8221	86.5918	44.1671	122.728	22.973	84.4958	-1.88395	0.000118903	0.00678082	ACO1	9	16886142	16887605	-	1326	-	- && A2Z1W9.1 RecName: Full=1-aminocyclopropane-1-carboxylate oxidase 1; Short=ACC oxidase 1; AltName: Full=Ethylene-forming enzyme; Short=EFE && PF14226:non-haem dioxygenase in morphine synthesis N-terminal|PF03171:2OG-Fe(II) oxygenase superfamily	2OG-FeII_Oxy
Os05g0516700	360.811	351.773	507.055	207.624	253.285	141.03	406.546	200.646	1.0158	0.000122285	0.00692844	-	5	25624026	25624868	+	843	-	- && - && -	-
Os01g0307686	400.674	346.416	418.454	168.264	246.975	97.9675	388.515	171.069	1.18	0.000124399	0.00701141	-	1	11505079	11506118	-	933	-	- && Q55EX9.2 RecName: Full=Putative methyltransferase DDB_G0268948 && -	-
Os07g0421000	1.02213	0	0	22.632	9.91507	13.9954	0.340709	15.5141	-5.44763	0.00012523	0.0070418	OsFBX234	7	13513636	13515776	-	1530	-	- && - && PF12937:F-box-like	-
Os03g0439500	41.9072	76.7829	138.773	419.183	316.381	138.877	85.821	291.48	-1.76609	0.000128244	0.00717778	-	3	18569114	18572507	+	2611	-	- && Q39224.1 RecName: Full=Protein SRG1; Short=AtSRG1; AltName: Full=Protein SENESCENCE-RELATED GENE 1 && PF14226:non-haem dioxygenase in morphine synthesis N-terminal|PF03171:2OG-Fe(II) oxygenase superfamily	2OG-FeII_Oxy
novel.260	136.965	152.673	170.797	83.6399	85.6301	52.7517	153.479	74.0072	1.04752	0.000131217	0.0072993	-	11	28228906	28232532	+	3531	-	PF08263:Leucine rich repeat N-terminal domain|PF00069:Protein kinase domain|PF13855:Leucine rich repeat|PF07714:Protein tyrosine kinase	Pkinase
Os05g0186300	473.245	453.555	457.951	257.808	282.129	133.494	461.584	224.477	1.03767	0.000131323	0.0072993	OscytME2	5	5293558	5297417	-	2240	-	- && P43279.2 RecName: Full=NADP-dependent malic enzyme, chloroplastic; Short=NADP-ME; Flags: Precursor && PF03949:Malic enzyme, NAD binding domain|PF00390:Malic enzyme, N-terminal domain	Malic_M
Os04g0581000	68.4826	80.3542	69.3865	27.552	36.0548	17.225	72.7411	26.9439	1.42429	0.000133976	0.00742967	-	4	29331563	29338260	+	1361	-	- && Q9FLV0.1 RecName: Full=Protein DOWNY MILDEW RESISTANCE 6; Short=AtDMR6; AltName: Full=2-oxoglutarate (2OG)-Fe(II) oxygenase-like protein DMR6; AltName: Full=Salicylate 3-hydroxylase DMR6; Short=S3H DMR6; Short=SA 3-hydroxylase DMR6; Short=Salicylic acid 3-hydroxylase DMR6 && PF03171:2OG-Fe(II) oxygenase superfamily|PF14226:non-haem dioxygenase in morphine synthesis N-terminal	2OG-FeII_Oxy
Os09g0350900	15.3319	24.9991	12.8098	51.1679	45.0685	83.9721	17.7136	60.0695	-1.74783	0.000137534	0.0075575	-	9	11123332	11132792	-	2296	-	- && O81069.1 RecName: Full=Probable leucine-rich repeat receptor-like protein kinase At2g28990; Flags: Precursor && PF12819:Carbohydrate-binding protein of the ER|PF07714:Protein tyrosine kinase	Pkinase_Tyr
Os01g0695800	392.497	432.127	520.932	290.279	219.033	136.724	448.519	215.345	1.0569	0.000138051	0.00756865	MDR4	1	28786544	28787701	-	889	-	- && Q9M0M2.2 RecName: Full=ABC transporter B family member 9; Short=ABC transporter ABCB.9; Short=AtABCB9; AltName: Full=Multidrug resistance protein 9; AltName: Full=P-glycoprotein 9 && PF00005:ABC transporter	ABC_tran
Os08g0434500	190.116	273.204	262.601	98.3998	155.937	95.8143	241.974	116.717	1.04911	0.000141685	0.0077059	OsCslA11	8	21078139	21079066	+	396	-	- && Q6YWK8.1 RecName: Full=Probable mannan synthase 11; AltName: Full=Cellulose synthase-like protein A11; AltName: Full=OsCslA11 && -	-
Os01g0798800	151.275	156.244	230.577	88.5598	100.052	67.8236	179.365	85.4785	1.06466	0.000144649	0.00777141	-	1	33812915	33815127	-	2126	-	- && - && PF13968:Domain of unknown function (DUF4220)|PF04578:Protein of unknown function, DUF594	-
Os06g0710700	62.3498	72.3188	84.3312	160.392	166.753	116.269	72.9999	147.805	-1.0207	0.000146864	0.00783808	-	6	30051761	30053353	-	1593	-	- && Q8GT20.1 RecName: Full=Benzyl alcohol O-benzoyltransferase; AltName: Full=Benzoyl coenzyme A:benzyl alcohol benzoyl transferase && PF02458:Transferase family	-
Os11g0628000	148.209	174.101	245.521	83.6399	107.263	85.0487	189.277	91.9838	1.03796	0.000152849	0.00809357	-	11	24616115	24619613	+	3351	-	- && Q1MX30.1 RecName: Full=Receptor kinase-like protein Xa21; Contains: RecName: Full=Receptor kinase-like protein Xa21, processed; Flags: Precursor && PF00069:Protein kinase domain|PF08263:Leucine rich repeat N-terminal domain|PF13855:Leucine rich repeat	Pkinase
Os10g0135650	4.08851	0	0	13.776	24.337	25.8376	1.36284	21.3168	-3.99629	0.000154549	0.00810474	-	10	2208448	2209029	-	582	-	- && - && -	-
novel.594	81.7702	63.3906	56.5766	135.792	182.077	115.193	67.2458	144.354	-1.10448	0.000156856	0.00819015	-	3	23789030	23793121	-	2857	-	PF08387:FBD	-
Os08g0198300	115.5	101.782	109.951	63.9599	48.674	46.2923	109.078	52.9754	1.04048	0.000158886	0.00826398	-	8	5681460	5683088	+	1294	-	- && Q9M8J9.1 RecName: Full=BTB/POZ and MATH domain-containing protein 2; AltName: Full=Protein BTB-POZ AND MATH DOMAIN 2; Short=AtBPM2 && -	-
Os07g0449100	65.4162	75.8901	90.7361	148.584	190.189	129.188	77.3475	155.987	-1.01528	0.000160516	0.00831608	-	7	15421991	15425210	-	764	-	- && O49636.1 RecName: Full=Mitochondrial pyruvate carrier 4 && PF03650:Uncharacterised protein family (UPF0041)	-
Os05g0535800	65.4162	58.0336	41.6319	140.712	111.77	104.427	55.0272	118.969	-1.11048	0.000161362	0.00833518	-	5	26608277	26612344	+	1567	-	- && P46228.4 RecName: Full=30S ribosomal protein S1 && PF00575:S1 RNA binding domain	S1
Os10g0108700	64.3941	96.4251	208.159	610.079	379.477	207.777	122.993	399.111	-1.7001	0.000165479	0.00845729	OsAT15	10	583024	584657	+	1512	-	- && Q7XHC4.1 RecName: Full=Acyl transferase 15; Short=OsAT15 && PF02458:Transferase family	-
Os01g0768333	57.2392	52.6767	54.4417	16.728	25.2384	18.3016	54.7858	20.0893	1.44106	0.000174167	0.00887714	OsSAUR2	1	32390305	32390673	+	369	-	- && - && PF02519:Auxin responsive protein	Auxin_inducible
Os04g0464100	82.7924	95.5323	78.9938	26.568	47.7726	31.2204	85.7728	35.187	1.28086	0.00017443	0.00887714	-	4	23165556	23166329	+	774	-	- && - && -	-
Os01g0510200	80.7481	124.995	88.6012	50.1839	41.463	34.4501	98.1149	42.0323	1.2237	0.000180347	0.00908568	-	1	17911538	17912144	-	607	-	- && - && -	-
Os02g0137600	15.3319	12.4995	19.2147	61.0079	43.2657	40.9095	15.6821	48.3944	-1.63333	0.000180787	0.00908568	-	2	1998224	2000826	+	1636	-	- && C6D563.1 RecName: Full=Ribosomal RNA small subunit methyltransferase H; AltName: Full=16S rRNA m(4)C1402 methyltransferase; AltName: Full=rRNA (cytosine-N(4)-)-methyltransferase RsmH && PF01795:MraW methylase family	-
Os11g0457000	0	2.67847	8.53987	80.6879	40.5616	9.68909	3.73945	43.6462	-3.56213	0.000181857	0.0090998	-	11	15475373	15476302	-	930	-	- && Q43716.1 RecName: Full=Anthocyanidin 3-O-glucosyltransferase; AltName: Full=Anthocyanin rhamnosyl transferase; AltName: Full=Flavonol 3-O-glucosyltransferase; AltName: Full=UDP-glucose flavonoid 3-O-glucosyltransferase && -	-
Os11g0116400	45.9958	35.713	77.9263	199.752	188.386	81.819	53.2117	156.652	-1.56369	0.000182055	0.0090998	-	11	734252	737187	+	946	-	- && B0JHV3.1 RecName: Full=Elongation factor P; Short=EF-P && PF01132:Elongation factor P (EF-P) OB domain|PF08207:Elongation factor P (EF-P) KOW-like domain|PF09285:Elongation factor P, C-terminal	-
Os01g0106400	44.9736	68.7475	67.2515	184.008	330.803	78.5893	60.3242	197.8	-1.71443	0.0001822	0.0090998	-	1	327128	328450	-	1206	-	- && P52580.1 RecName: Full=Isoflavone reductase homolog IRL && PF05368:NmrA-like family	NmrA
novel.134	280.063	341.952	351.202	160.392	211.822	103.35	324.406	158.521	1.02999	0.000182823	0.00911206	-	10	8815240	8827784	+	1829	-	PF00201:UDP-glucoronosyl and UDP-glucosyl transferase	UDPGT
Os06g0643500	2.04426	4.46412	78.9938	0.983998	0	0	28.5007	0.327999	6.33307	0.000184984	0.00920075	-	6	26227109	26228735	+	1338	-	- && Q00451.1 RecName: Full=36.4 kDa proline-rich protein && PF14547:Hydrophobic seed protein	-
Os11g0275500	100.169	110.71	112.086	293.231	211.822	156.102	107.655	220.385	-1.03444	0.000185485	0.00920667	-	11	9773256	9776906	+	1044	-	- && Q9ZT66.1 RecName: Full=Endo-1,3;1,4-beta-D-glucanase; Flags: Precursor && PF01738:Dienelactone hydrolase family	-
Os07g0127700	148.209	154.459	178.27	43.2959	93.7424	25.8376	160.312	54.292	1.55453	0.000189877	0.00935947	PR1b	7	1444739	1445064	+	326	-	- && Q40374.1 RecName: Full=Pathogenesis-related protein PR-1; Flags: Precursor && -	-
Os10g0427900	29.6417	37.4986	27.7546	96.4318	82.926	58.1345	31.6316	79.1641	-1.32106	0.000190115	0.00935947	-	10	15220656	15223120	-	2465	-	- && - && -	-
Os11g0543500	80.7481	57.1408	91.8036	181.056	120.784	197.011	76.5642	166.284	-1.1209	0.000192002	0.00940889	-	11	19956772	19963299	-	1644	-	- && Q68CP4.2 RecName: Full=Heparan-alpha-glucosaminide N-acetyltransferase; AltName: Full=Transmembrane protein 76 && PF07786:Protein of unknown function (DUF1624)	-
Os11g0502700	921.959	1004.43	898.821	554.975	504.767	211.007	941.736	423.583	1.15174	0.000195712	0.00951845	-	11	17911046	17912013	+	968	-	- && - && -	-
novel.767	22.4868	21.4278	12.8098	0	1.80274	3.2297	18.9081	1.67748	3.52055	0.000200277	0.00970137	-	5	29427670	29428590	+	921	-	PF05699:hAT family C-terminal dimerisation region	hATC
Os07g0693800	139.009	110.71	234.846	480.191	338.915	280.984	161.522	366.697	-1.18558	0.000201634	0.00971276	FAD8	7	29531284	29534119	+	1634	-	- && P48619.1 RecName: Full=Omega-3 fatty acid desaturase, chloroplastic; Flags: Precursor && PF11960:Domain of unknown function (DUF3474)|PF00487:Fatty acid desaturase	-
Os11g0117600	409.873	410.699	552.957	231.24	292.945	138.877	457.843	221.021	1.04797	0.00020172	0.00971276	OsWRKY50	11	794803	795540	-	465	-	- && - && PF03106:WRKY DNA -binding domain	WRKY
Os12g0518200	382.276	376.772	322.38	225.336	147.825	74.283	360.476	149.148	1.27165	0.000210248	0.0100432	FCO9	12	20138135	20141194	-	1405	-	- && Q9FGG3.1 RecName: Full=WAT1-related protein At5g64700 && PF00892:EamA-like transporter family	DUF6
Os07g0559400	74.6153	91.0681	99.276	369.983	236.159	113.039	88.3198	239.727	-1.44156	0.000217204	0.0103427	-	7	22346421	22348417	-	1386	-	- && - && PF06764:Protein of unknown function (DUF1223)	-
Os04g0598900	53.1506	59.8193	61.9141	18.696	28.8438	16.1485	58.2947	21.2294	1.44802	0.000217697	0.0103427	OsWAK50	4	30215063	30217691	-	2405	-	- && Q9LMP1.1 RecName: Full=Wall-associated receptor kinase 2; Flags: Precursor && PF00069:Protein kinase domain|PF13947:Wall-associated receptor kinase galacturonan-binding	Pkinase
Os01g0723500	51.1064	40.1771	73.6564	140.712	91.9397	170.097	54.98	134.25	-1.29048	0.000217805	0.0103427	-	1	30173442	30179045	+	1209	-	- && Q8S2E6.1 RecName: Full=B3 domain-containing protein Os01g0723500 && PF02362:B3 DNA binding domain	B3
Os03g0405500	4169.26	4748.94	4862.39	2382.26	2997.05	1164.84	4593.53	2181.39	1.07409	0.000218378	0.0103496	-	3	16590192	16595911	+	2056	-	- && Q7Y0E8.1 RecName: Full=Probable nucleoredoxin 1-1; Short=OsNrx1-1 && PF07649:C1-like domain|PF13905:Thioredoxin-like	C1_3
Os04g0469300	120.611	102.675	101.411	47.2319	63.9972	45.2157	108.232	52.1483	1.04856	0.00022432	0.0105278	-	4	23435713	23436494	-	634	-	- && - && -	-
Os11g0164900	169.673	160.708	203.889	72.8159	116.277	60.2877	178.09	83.1267	1.09332	0.000234129	0.0108298	-	11	3152475	3154921	-	600	-	- && - && -	-
novel.645	15.3319	9.82107	8.53987	26.568	53.1808	46.2923	11.231	42.0137	-1.90549	0.000234347	0.0108298	-	4	18246525	18247415	+	785	-	-	-
Os03g0251000	130.832	78.5686	175.067	434.927	333.507	192.705	128.156	320.38	-1.32516	0.000238423	0.0109761	-	3	7965176	7966095	-	920	-	- && - && -	-
Os12g0556200	1259.26	1328.52	1169.96	657.311	839.175	350.96	1252.58	615.815	1.02345	0.000248395	0.011182	-	12	22628910	22632952	+	2086	-	- && Q9FKL6.1 RecName: Full=Calmodulin-binding protein 60 B && PF07887:Calmodulin binding protein-like	-
Os07g0527000	7.1549	0.892825	3.20245	40.3439	29.7452	13.9954	3.75006	28.0282	-2.92618	0.000248554	0.011182	-	7	20562555	20567659	+	1119	-	- && Q9FGG3.1 RecName: Full=WAT1-related protein At5g64700 && PF00892:EamA-like transporter family	DUF6
Os04g0109400	103.235	109.817	78.9938	44.2799	45.9699	18.3016	97.3487	36.1838	1.42144	0.000250615	0.0112163	-	4	560485	562482	+	1998	-	- && Q9M345.1 RecName: Full=L-type lectin-domain containing receptor kinase IV.2; Short=Arabidopsis thaliana lectin-receptor kinase a4; Short=AthlecRK-a4; Short=LecRK-IV.2; AltName: Full=Protein SMALL, GLUED-TOGETHER, AND COLLAPSED POLLEN; Flags: Precursor && PF07714:Protein tyrosine kinase|PF00139:Legume lectin domain	Pkinase_Tyr
novel.1098	3.06638	0.892825	0	24.6	13.5205	15.0719	1.31974	17.7308	-3.74809	0.000257911	0.011374	-	8	16916626	16917445	-	728	-	PF06839:GRF zinc finger	zf-GRF
Os08g0428200	82.7924	69.6403	69.3865	29.5199	35.1534	34.4501	73.9397	33.0412	1.1613	0.000259698	0.0114319	-	8	20601638	20601971	+	334	-	- && - && -	-
Os01g0850700	206.47	171.422	294.626	488.063	314.578	619.025	224.173	473.889	-1.08051	0.000265662	0.0116308	OsLAC8	1	36622829	36627662	+	2036	-	- && Q5N7B4.1 RecName: Full=Laccase-7; AltName: Full=Benzenediol:oxygen oxidoreductase 7; AltName: Full=Diphenol oxidase 7; AltName: Full=Urishiol oxidase 7; Flags: Precursor && PF07732:Multicopper oxidase|PF00394:Multicopper oxidase|PF07731:Multicopper oxidase	-
Os05g0226300	25.5532	29.4632	25.6196	84.6239	73.9123	48.4454	26.8787	68.9939	-1.36023	0.000266409	0.0116424	-	5	7704963	7707764	+	2389	-	- && - && -	-
Os02g0768400	13.2877	10.7139	13.8773	49.1999	26.1397	59.2111	12.6263	44.8502	-1.82863	0.00027605	0.0119554	-	2	32369917	32373572	-	1924	-	- && - && -	-
Os09g0445500	5.11064	9.82107	14.9448	49.1999	36.9562	30.1438	9.95883	38.7666	-1.96655	0.000280407	0.0121223	-	9	16610187	16611618	+	1363	-	- && P93751.1 RecName: Full=Zinc finger protein 8 && -	-
Os01g0389700	185.005	158.03	247.656	120.048	92.8411	66.7471	196.897	93.212	1.07535	0.000281656	0.0121522	-	1	16435858	16436778	+	921	-	- && - && PF05078:Protein of unknown function (DUF679)	-
Os08g0125059	42.9294	51.7838	62.9816	18.696	20.7315	6.45939	52.5649	15.2956	1.76715	0.000286581	0.0123125	-	8	1448333	1450498	+	2078	-	- && Q9LXA5.1 RecName: Full=L-type lectin-domain containing receptor kinase IX.1; Short=LecRK-IX.1; Flags: Precursor && -	-
Os01g0247600	56.217	57.1408	33.092	142.68	105.46	91.5081	48.8166	113.216	-1.21013	0.000286861	0.0123125	-	1	8130258	8130932	+	675	-	- && - && -	-
Os04g0229100	3837.07	4356.09	4611.53	2426.54	2618.48	1041.04	4268.23	2028.69	1.07283	0.000294589	0.0125554	OsCAD6	4	8637314	8639345	-	1376	-	- && Q7XWU3.2 RecName: Full=Probable cinnamyl alcohol dehydrogenase 6; Short=OsCAD6 && PF08240:Alcohol dehydrogenase GroES-like domain|PF00107:Zinc-binding dehydrogenase	ADH_N
Os11g0565000	62.3498	62.4977	76.8588	14.76	27.0411	33.3735	67.2355	25.0582	1.42639	0.000308859	0.0130483	-	11	21040870	21043941	+	3072	-	- && - && PF08263:Leucine rich repeat N-terminal domain	LRRNT_2
Os01g0813700	45.9958	24.1063	22.4172	176.136	113.573	44.1392	30.8397	111.282	-1.85401	0.000309594	0.0130565	Os1bglu2	1	34588835	34602432	-	1749	-	- && B7F8N7.1 RecName: Full=Beta-glucosidase 2; Short=Os1bglu2; Flags: Precursor && PF00232:Glycosyl hydrolase family 1	Glyco_hydro_1
Os08g0337800	0	3.5713	0	27.552	17.126	12.9188	1.19043	19.1989	-3.91831	0.000313582	0.0131557	-	8	15196859	15198349	+	1371	-	- && - && PF03140:Plant protein of unknown function	-
Os03g0118200	34.7523	21.4278	30.957	84.6239	75.7151	55.9814	29.0457	72.1068	-1.31956	0.000315129	0.0131977	-	3	991125	994700	+	1503	-	- && Q29Q28.1 RecName: Full=UDP-galactose/UDP-glucose transporter 2; Short=AtUTr2 && PF08449:UAA transporter family	-
Os09g0483400	83.8145	96.4251	81.1288	46.2479	40.5616	39.8329	87.1228	42.2142	1.04674	0.000317825	0.0132326	-	9	18669321	18671699	+	781	-	- && P0CH27.1 RecName: Full=Ubiquitin-60S ribosomal protein L40; Contains: RecName: Full=Ubiquitin; Contains: RecName: Full=60S ribosomal protein L40; Flags: Precursor && PF00240:Ubiquitin family|PF01020:Ribosomal L40e family	ubiquitin
Os11g0229300	103.235	99.1036	101.411	61.0079	46.8712	41.9861	101.25	49.9551	1.01756	0.000318097	0.0132326	-	11	6872016	6877424	+	1983	-	- && Q38834.2 RecName: Full=Disease resistance RPP13-like protein 4; AltName: Full=Disease resistance protein ZAR1; AltName: Full=Protein HOPZ-ACTIVATED RESISTANCE 1 && PF00931:NB-ARC domain	NB-ARC
Os12g0222900	58.2613	75.8901	66.184	24.6	1.80274	16.1485	66.7785	14.1837	2.24523	0.000320515	0.0132853	-	12	6650911	6654226	+	3316	-	- && - && PF13855:Leucine rich repeat|PF08263:Leucine rich repeat N-terminal domain	LRRNT_2
Os01g0872566	36.7966	48.2125	74.7239	215.496	137.91	85.0487	53.2443	146.151	-1.45994	0.000331509	0.0136342	-	1	37837235	37840175	-	1637	-	- && Q9C7U1.1 RecName: Full=Protein NRT1/ PTR FAMILY 5.12; Short=AtNPF5.12 && -	-
Os08g0434632	581.591	738.366	976.748	455.591	440.77	243.304	765.568	379.888	1.00975	0.000331771	0.0136342	OsCslA11	8	21083276	21086649	+	2633	-	- && Q6YWK8.1 RecName: Full=Probable mannan synthase 11; AltName: Full=Cellulose synthase-like protein A11; AltName: Full=OsCslA11 && PF00535:Glycosyl transferase family 2	Glycos_transf_2
Os08g0112300	278.019	276.776	298.895	103.32	182.077	53.8283	284.563	113.075	1.32723	0.000332708	0.0136495	-	8	655771	657391	-	1621	-	- && Q9SND9.1 RecName: Full=Uncharacterized acetyltransferase At3g50280 && PF02458:Transferase family	-
Os11g0208651	73.5932	66.069	113.153	31.4879	37.8575	11.8422	84.2718	27.0626	1.62765	0.000335755	0.0137278	-	11	5569289	5571785	+	2497	-	- && O64477.1 RecName: Full=G-type lectin S-receptor-like serine/threonine-protein kinase At2g19130; Flags: Precursor && -	-
Os07g0607400	123.677	110.71	57.6441	39.3599	43.2657	20.4547	97.344	34.3601	1.49787	0.000351349	0.0141814	OsPME20	7	24961190	24964182	-	1730	-	- && Q9FM79.1 RecName: Full=Pectinesterase QRT1; Short=AtQRT1; Short=PE QRT1; AltName: Full=Pectin methylesterase 62; Short=AtPME62; AltName: Full=Pectin methylesterase QRT1; AltName: Full=Protein QUARTET 1; Flags: Precursor && PF01095:Pectinesterase	-
Os03g0832800	12.2655	16.0708	21.3497	127.92	87.4329	18.3016	16.562	77.8847	-2.23696	0.000364337	0.0145031	GPAT	3	34985196	34990759	+	5564	-	- && Q9FZ22.1 RecName: Full=Probable glycerol-3-phosphate acyltransferase 2; Short=AtGPAT2 && -	-
Os05g0217700	9816.52	7903.29	9632.97	18449	10491.9	26747.3	9117.59	18562.7	-1.02567	0.000367038	0.0145387	OsBURP07	5	7249980	7251356	+	1088	-	- && Q60E34.1 RecName: Full=BURP domain-containing protein 7; Short=OsBURP07; Flags: Precursor && -	-
Os01g0537250	72.5711	91.961	52.3067	35.4239	24.337	12.9188	72.2796	24.2266	1.57405	0.000380607	0.0150023	-	1	19549155	19550345	-	1191	-	- && - && PF12620:Protein of unknown function (DUF3778)	-
Os02g0813600	438.493	342.845	745.104	220.416	301.057	152.872	508.814	224.782	1.17632	0.000393959	0.0154027	-	2	34853787	34855494	+	1708	-	- && Q9SIB2.1 RecName: Full=3-ketoacyl-CoA synthase 12; Short=KCS-12; AltName: Full=Very long-chain fatty acid condensing enzyme 12; Short=VLCFA condensing enzyme 12; Flags: Precursor && PF08541:3-Oxoacyl-[acyl-carrier-protein (ACP)] synthase III C terminal|PF08392:FAE1/Type III polyketide synthase-like protein	-
Os12g0622900	135.943	102.675	116.356	55.1039	72.1096	46.2923	118.325	57.8353	1.02656	0.000396675	0.0154393	-	12	26599762	26604728	+	1642	-	- && Q8W206.2 RecName: Full=COP9 signalosome complex subunit 6a; Short=AtCSN6a; Short=Signalosome subunit 6a && PF01398:JAB1/Mov34/MPN/PAD-1 ubiquitin protease	Mov34
Os03g0812400	56.217	46.4269	59.7791	24.6	21.6329	16.1485	54.141	20.7938	1.37398	0.000398705	0.0154879	-	3	34036246	34037092	+	847	-	- && Q0DJ94.2 RecName: Full=Probable calcium-binding protein CML21; AltName: Full=Calmodulin-like protein 21 && PF13499:EF-hand domain pair	-
Os08g0536350	31.686	18.7493	13.8773	85.6079	38.7589	82.8955	21.4375	69.0874	-1.68581	0.000403769	0.0156342	-	8	26807207	26808282	+	1076	-	- && - && -	-
Os09g0491822	15.3319	10.7139	11.7423	73.7999	48.674	22.6079	12.596	48.3606	-1.94604	0.000411492	0.0158316	OsCCR32	9	19003187	19004492	-	738	-	- && Q6K9A2.1 RecName: Full=Cinnamoyl-CoA reductase 1; Short=OsCCR1 && PF01370:NAD dependent epimerase/dehydratase family	Epimerase
Os03g0205800	96.08	57.1408	84.3312	28.536	40.5616	27.9907	79.184	32.3628	1.28333	0.000417209	0.0160178	-	3	5538810	5540247	-	1218	-	- && Q42381.1 RecName: Full=Probable N-acetyltransferase HLS1; AltName: Full=Protein CONSTITUTIVE PHOTOMORPHOGENIC 3; AltName: Full=Protein HOOKLESS 1; AltName: Full=Protein UNUSUAL SUGAR RESPONSE 2 && PF00583:Acetyltransferase (GNAT) family	Acetyltransf_1
Os11g0138950	20.4426	24.1063	46.9693	6.88799	6.30959	0	30.506	4.39919	2.76651	0.000435376	0.016618	-	11	1811380	1812827	-	1448	-	- && Q9LFR7.1 RecName: Full=Probable carboxylesterase 17; AltName: Full=AtCXE17 && PF07859:alpha/beta hydrolase fold	Abhydrolase_3
Os05g0475550	22.4868	40.1771	13.8773	0	6.30959	1.07657	25.5137	2.46205	3.33526	0.000443428	0.016872	-	5	23374087	23377731	+	611	-	- && - && -	-
Os04g0340100	91.9915	68.7475	77.9263	40.3439	33.3507	37.6798	79.5551	37.1248	1.09963	0.00045191	0.0171406	-	4	16044638	16046020	-	687	-	- && - && -	-
Os10g0136500	1.02213	0	0	12.792	9.91507	12.9188	0.340709	11.8753	-5.06173	0.000455196	0.0171842	-	10	2257492	2262619	+	2201	-	- && Q9LZU4.1 RecName: Full=Cysteine-rich receptor-like protein kinase 4; Short=Cysteine-rich RLK4; Flags: Precursor && PF01657:Salt stress response/antifungal|PF07714:Protein tyrosine kinase	Pkinase_Tyr
Os05g0475600	18.3983	16.0708	12.8098	0	2.70411	1.07657	15.7597	1.26022	3.60803	0.000462875	0.0174151	-	5	23374299	23375716	-	654	-	- && - && -	-
Os10g0134900	1.02213	0	0	10.824	17.126	8.61252	0.340709	12.1875	-5.10497	0.00046348	0.0174151	-	10	2163122	2164565	+	1444	-	- && - && -	-
Os11g0687100	3452.75	3637.37	5512.49	1491.74	3061.05	1315.56	4200.87	1956.12	1.10238	0.000480318	0.01787	-	11	27828727	27835243	+	2348	-	- && - && PF13768:von Willebrand factor type A domain	-
Os06g0534500	11.2434	14.2852	19.2147	0.983998	1.80274	1.07657	14.9144	1.28777	3.51538	0.000480769	0.01787	-	6	19999929	20000815	+	887	-	- && Q9C7I1.1 RecName: Full=RING-H2 finger protein ATL34; AltName: Full=RING-type E3 ubiquitin transferase ATL34; Flags: Precursor && PF13639:Ring finger domain	-
Os01g0508100	123.677	172.315	155.853	68.8799	87.4329	33.3735	150.615	63.2288	1.24695	0.000482399	0.0178795	RH3	1	17767883	17768453	+	571	-	- && B7F924.1 RecName: Full=NRR repressor homolog 3 && PF15699:NPR1 interacting	-
novel.413	59.2834	55.3551	54.4417	12.792	22.5342	27.9907	56.3601	21.1056	1.42099	0.00048296	0.0178795	-	2	10483218	10486461	+	1984	-	-	-
Os12g0431300	14.3098	7.1426	36.2945	1.968	1.80274	1.07657	19.2489	1.61577	3.55671	0.000483249	0.0178795	-	12	13885480	13888224	-	2745	-	- && - && -	-
Os11g0236932	84.8366	96.4251	64.049	43.2959	33.3507	18.3016	81.7702	31.6494	1.36594	0.000488229	0.018036	-	11	7327021	7327544	-	524	-	- && - && -	-
Os08g0196200	19.4204	8.92825	16.0123	33.4559	50.4767	55.9814	14.787	46.638	-1.66617	0.000492363	0.0181332	-	8	5584231	5587025	-	1275	-	- && Q9M0U6.1 RecName: Full=Putative F-box/LRR-repeat protein 22 && -	-
Os07g0550600	40.8851	19.6421	16.0123	1.968	4.50685	6.45939	25.5132	4.31141	2.57342	0.000509822	0.0186906	-	7	21854727	21856893	+	1623	-	- && Q8GT20.1 RecName: Full=Benzyl alcohol O-benzoyltransferase; AltName: Full=Benzoyl coenzyme A:benzyl alcohol benzoyl transferase && PF02458:Transferase family	-
Os11g0189900	18.3983	16.9637	8.53987	24.6	65.8	75.3596	14.6339	55.2532	-1.91066	0.000514105	0.0187905	-	11	4557930	4566087	-	729	-	- && Q53NI2.1 RecName: Full=Probable NAD kinase 2, chloroplastic; Flags: Precursor && PF14817:HAUS augmin-like complex subunit 5	-
novel.1146	10.2213	15.178	9.60736	0	0.90137	0	11.6689	0.300457	5.05108	0.000526596	0.0191032	-	9	21985040	21985652	+	536	-	-	-
novel.761	114.478	74.1045	135.57	39.3599	55.8849	17.225	108.051	37.49	1.51748	0.00052662	0.0191032	-	5	27101337	27102649	+	1313	-	-	-
Os04g0354600	1.02213	3.5713	30.957	745.871	512.879	41.9861	11.8502	433.579	-5.19738	0.000530762	0.019167	OsCER4	4	16945210	16951596	+	1861	-	- && Q39152.1 RecName: Full=Fatty acyl-CoA reductase 1 && PF03015:Male sterility protein|PF07993:Male sterility protein	NAD_binding_4
Os02g0828400	43.9515	28.5704	33.092	7.87199	9.0137	13.9954	35.2046	10.2937	1.78104	0.000537777	0.0193362	-	2	35585773	35587148	+	1376	-	- && - && -	-
Os12g0604300	40.8851	39.2843	51.2392	128.904	104.559	66.7471	43.8029	100.07	-1.19648	0.00054021	0.0193921	-	12	25487738	25493739	+	1799	-	- && Q8W4K5.1 RecName: Full=VAN3-binding protein; AltName: Full=Protein FORKED 1 && PF08458:Plant pleckstrin homology-like region|PF05703:Auxin canalisation	-
Os04g0635500	237.134	156.244	320.245	92.4958	107.263	139.954	237.874	113.237	1.07057	0.000541209	0.0193991	-	4	32333452	32333991	-	540	-	- && - && PF12609:Wound-induced protein	-
Os10g0503250	9536.45	9987.14	14529.5	5803.62	7307.4	2646.2	11351	5252.41	1.11166	0.000558922	0.0197986	-	10	19213699	19214691	-	993	-	- && Q8GT20.1 RecName: Full=Benzyl alcohol O-benzoyltransferase; AltName: Full=Benzoyl coenzyme A:benzyl alcohol benzoyl transferase && PF02458:Transferase family	-
Os04g0364800	6.13277	0	28.8221	450.671	280.326	285.29	11.6516	338.762	-4.86719	0.000561769	0.0198703	-	4	17560683	17561234	+	552	-	- && Q7XVA8.2 RecName: Full=Putative ripening-related protein 1; Flags: Precursor && -	-
Os07g0462800	15.3319	4.46412	9.60736	20.664	47.7726	60.2877	9.80113	42.9081	-2.14006	0.000566719	0.0199868	-	7	16272981	16274517	+	1114	-	- && A8QW53.1 RecName: Full=5-pentadecatrienyl resorcinol O-methyltransferase; AltName: Full=O-methyltransferase 3; Short=SbOMT3 && PF00891:O-methyltransferase|PF08100:Dimerisation domain	-
Os12g0218500	83.8145	86.604	64.049	45.2639	27.9425	20.4547	78.1558	31.2204	1.32232	0.000569309	0.0200279	-	12	6343046	6344082	+	1037	-	- && - && PF13855:Leucine rich repeat	-
Os02g0685200	32.7081	40.1771	25.6196	88.5598	64.8986	71.0533	32.8349	74.8373	-1.18187	0.000582853	0.0202596	OsMyb1R	2	28041117	28044149	-	2081	-	- && F4KGY6.1 RecName: Full=Protein REVEILLE 1 && PF00249:Myb-like DNA-binding domain	Myb_DNA-binding
Os01g0248701	2507.28	3154.35	3807.72	1463.21	2153.37	746.06	3156.45	1454.21	1.11768	0.000586276	0.0203116	-	1	8191032	8192289	+	1258	-	- && P34802.2 RecName: Full=Heterodimeric geranylgeranyl pyrophosphate synthase large subunit 1, chloroplastic; Short=GGPP synthase 1; Short=GGPS1; AltName: Full=(2E,6E)-farnesyl diphosphate synthase 1; AltName: Full=Dimethylallyltranstransferase 1; AltName: Full=Farnesyl diphosphate synthase 1; AltName: Full=Farnesyltranstransferase 1; AltName: Full=Geranyltranstransferase 1; Flags: Precursor &&…	-
Os08g0331900	459.958	451.769	392.834	252.888	184.781	58.1345	434.854	165.268	1.39414	0.000587923	0.0203187	-	8	14675041	14676325	+	1285	-	- && Q2R2D5.1 RecName: Full=Receptor kinase-like protein Xa21; Contains: RecName: Full=Receptor kinase-like protein Xa21, processed; Flags: Precursor && PF13855:Leucine rich repeat|PF00069:Protein kinase domain	Pkinase
Os03g0405400	211.58	263.383	417.386	145.632	150.529	53.8283	297.45	116.663	1.34713	0.000589214	0.0203342	-	3	16588547	16593603	-	4903	-	- && Q7Y0E8.1 RecName: Full=Probable nucleoredoxin 1-1; Short=OsNrx1-1 && -	-
Os01g0294700	122.655	197.314	365.08	879.694	505.668	381.104	228.35	588.822	-1.36755	0.000591794	0.0203941	OsPOD	1	10748692	10750233	-	1331	-	- && Q9FEQ8.1 RecName: Full=Peroxidase 2; AltName: Full=Plasma membrane-bound peroxidase 2; Short=pmPOX2; Flags: Precursor && PF00141:Peroxidase	-
Os08g0550200	17.3762	15.178	11.7423	41.3279	36.9562	47.3689	14.7655	41.8843	-1.49944	0.000593227	0.0204143	-	8	27592835	27598698	-	1935	-	- && Q9SX83.1 RecName: Full=Protein DETOXIFICATION 33; Short=AtDTX33; AltName: Full=Multidrug and toxic compound extrusion protein 33; Short=MATE protein 33 && PF01554:MatE	MatE
Os09g0119600	1.02213	1.78565	1.06748	27.552	10.8164	9.68909	1.29175	16.0192	-3.61417	0.00059833	0.0205606	-	9	1503778	1505356	-	1579	-	- && U3U992.1 RecName: Full=7-deoxyloganetic acid glucosyltransferase; AltName: Full=UDP-glucose glucosyltransferase 8; Short=CrUGT8; AltName: Full=UDP-glycosyltransferase 709C2 && PF00201:UDP-glucoronosyl and UDP-glucosyl transferase	UDPGT
Os06g0185300	816.68	1091.03	889.214	363.095	681.435	247.61	932.309	430.714	1.11297	0.000604202	0.0206447	Os-PHT2	6	4286708	4287890	+	1183	-	- && Q5SMQ0.1 RecName: Full=Putrescine hydroxycinnamoyltransferase 2; Short=OsPHT2 && PF02458:Transferase family	-
Os02g0697400	35.7745	41.0699	53.3742	119.064	111.77	65.6705	43.4062	98.8347	-1.1916	0.000667988	0.0222567	4CL2	2	28677205	28680864	-	2288	-	- && Q42982.2 RecName: Full=Probable 4-coumarate--CoA ligase 2; Short=4CL 2; Short=Os4CL2; AltName: Full=4-coumaroyl-CoA synthase 2 && PF13193:AMP-binding enzyme C-terminal domain|PF00501:AMP-binding enzyme	AMP-binding
Os04g0205200	95.0579	79.4614	116.356	52.1519	47.7726	25.8376	96.9584	41.9207	1.20229	0.000678732	0.0225524	-	4	7091053	7092765	+	1713	-	- && Q9STE5.1 RecName: Full=Putative disease resistance RPP13-like protein 2 && PF00931:NB-ARC domain	NB-ARC
novel.699	72.5711	89.2825	109.951	36.4079	51.3781	38.7564	90.6015	42.1808	1.09848	0.000681955	0.0225711	-	4	18098911	18106805	-	2540	-	PF00069:Protein kinase domain|PF07714:Protein tyrosine kinase|PF13947:Wall-associated receptor kinase galacturonan-binding	Pkinase_Tyr
Os02g0528500	1.02213	2.67847	6.4049	23.616	19.8301	18.3016	3.3685	20.5826	-2.62904	0.000684548	0.0226004	-	2	19376511	19385890	+	2422	-	- && - && -	-
Os05g0526700	155.363	147.316	201.754	77.7359	109.066	50.5986	168.145	79.1334	1.0812	0.000685681	0.0226004	-	5	26189646	26190616	-	971	-	- && - && PF03168:Late embryogenesis abundant protein	-
novel.425	36.7966	20.535	6.4049	73.7999	61.2931	81.819	21.2455	72.304	-1.76316	0.000706769	0.0231022	-	2	15925552	15928694	+	1496	-	-	-
Os09g0333500	87.903	92.8538	49.1043	160.392	134.304	169.021	76.6203	154.572	-1.00741	0.000719677	0.0233471	-	9	10066564	10069846	-	2583	-	- && B9G300.2 RecName: Full=ABC transporter G family member 52; Short=OsABCG52; AltName: Full=Pleiotropic drug resistance protein 18; Short=OsPDR18 && -	-
Os09g0449800	31.686	35.713	46.9693	78.7199	72.1096	90.4315	38.1228	80.4203	-1.07802	0.000740758	0.0238895	-	9	16847790	16848632	+	843	-	- && - && -	-
Os06g0293100	81.7702	69.6403	98.2085	40.3439	42.3644	38.7564	83.2064	40.4882	1.0352	0.000762265	0.0243874	-	6	10758256	10759995	+	1476	-	- && - && PF13962:Domain of unknown function	-
Os01g0311800	118.567	96.4251	289.288	33.4559	88.3342	34.4501	168.093	52.0801	1.68465	0.000779557	0.0248747	OsPME2	1	11715268	11717784	-	2436	-	- && Q8RXK7.2 RecName: Full=Probable pectinesterase/pectinesterase inhibitor 41; Includes: RecName: Full=Pectinesterase inhibitor 41; AltName: Full=Pectin methylesterase inhibitor 41; Includes: RecName: Full=Pectinesterase 41; Short=PE 41; AltName: Full=AtPMEpcrB; AltName: Full=Pectin methylesterase 41; Short=AtPME41; Flags: Precursor && PF01095:Pectinesterase|PF04043:Plant invertase/pectin methy…	-
Os01g0357200	9.19915	5.35695	26.6871	97.4158	63.0959	26.9141	13.7477	62.4753	-2.19835	0.000787757	0.0250696	-	1	14453690	14454549	+	563	-	- && - && PF02036:SCP-2 sterol transfer family	-
Os07g0148800	183.983	188.386	256.196	689.783	331.704	311.127	209.522	444.205	-1.08492	0.000797715	0.0252206	-	7	2542557	2545656	+	1460	-	- && F4IIU4.1 RecName: Full=187-kDa microtubule-associated protein AIR9; AltName: Full=Auxin-induced in root cultures protein 9 && -	-
Os01g0629600	54.1728	92.8538	83.2637	25.584	42.3644	25.8376	76.7634	31.262	1.29151	0.000810989	0.0255732	OsSCP4	1	25144502	25145949	+	1448	-	- && Q9M9Q6.1 RecName: Full=Serine carboxypeptidase-like 50; Flags: Precursor && PF00450:Serine carboxypeptidase	Peptidase_S10
Os06g0531751	40.8851	26.7847	30.957	72.8159	57.6877	105.503	32.8756	78.669	-1.25815	0.000820159	0.0256944	-	6	19855529	19856131	-	603	-	- && - && -	-
Os07g0188249	61.3277	51.7838	27.7546	111.192	90.137	113.039	46.9554	104.789	-1.15353	0.000833879	0.0260566	-	7	4725288	4725583	-	296	-	- && - && -	-
Os11g0644700	43.9515	42.8556	78.9938	664.199	416.433	76.4361	55.267	385.689	-2.80396	0.000865514	0.0268365	-	11	25594109	25594874	+	766	-	- && Q67YM6.1 RecName: Full=Dirigent protein 11; Short=AtDIR11; Flags: Precursor && PF03018:Dirigent-like protein	-
Os04g0321500	47.0179	49.1054	30.957	0	14.4219	1.07657	42.3601	5.16616	3.00633	0.000902036	0.0276901	-	4	14804703	14805459	+	438	-	- && A3M899.1 RecName: Full=50S ribosomal protein L27 >B7GXH9.1 RecName: Full=50S ribosomal protein L27 >B7I6V8.1 RecName: Full=50S ribosomal protein L27 >B2HXU8.1 RecName: Full=50S ribosomal protein L27 >B0VSH6.1 RecName: Full=50S ribosomal protein L27 >B0VEJ5.1 RecName: Full=50S ribosomal protein L27 && PF01016:Ribosomal L27 protein	-
Os11g0687200	882.096	972.286	1339.69	263.712	781.487	247.61	1064.69	430.936	1.30373	0.000903536	0.0276901	-	11	27841513	27846793	+	4913	-	- && - && PF13768:von Willebrand factor type A domain	-
Os06g0721800	28.6196	18.7493	14.9448	0	5.40822	0	20.7712	1.80274	3.46251	0.000903963	0.0276901	OsUCL19	6	30658369	30659202	-	747	-	- && P60496.1 RecName: Full=Chemocyanin; AltName: Full=Basic blue protein; AltName: Full=Plantacyanin; Flags: Precursor && PF02298:Plastocyanin-like domain	Cu_bind_like
Os11g0323860	52.1285	10.7139	49.1043	2.95199	4.50685	11.8422	37.3156	6.43369	2.54793	0.000904522	0.0276901	-	11	12226617	12227793	-	638	-	- && - && -	-
Os05g0421900	87.903	122.317	107.816	49.1999	39.6603	66.7471	106.012	51.8691	1.03828	0.000906175	0.0277055	GA20OX4	5	20685488	20692048	-	1227	-	- && Q0JH50.1 RecName: Full=Gibberellin 20 oxidase 2; AltName: Full=GA 20-oxidase 2; AltName: Full=Gibberellin C-20 oxidase 2; AltName: Full=Os20ox2; AltName: Full=Protein semidwarf-1 >P0C5H5.1 RecName: Full=Gibberellin 20 oxidase 2; AltName: Full=GA 20-oxidase 2; AltName: Full=Gibberellin C-20 oxidase 2; AltName: Full=Os20ox2; AltName: Full=Protein semidwarf-1 && PF14226:non-haem dioxygenase in …	2OG-FeII_Oxy
Os12g0443000	106.301	66.9619	97.141	53.1359	25.2384	15.0719	90.1347	31.1487	1.52862	0.000925504	0.0282249	-	12	14866174	14867766	-	1593	-	- && Q9FMV7.1 RecName: Full=Cytochrome P450 94B1 && PF00067:Cytochrome P450	p450
Os01g0845950	3.06638	0.892825	35.227	0	0	0	13.0621	0	6.16747	0.000947215	0.0285621	-	1	36323780	36325014	+	911	-	- && - && -	-
Os06g0323100	1489.24	1593.69	2242.78	724.223	1319.61	489.837	1775.24	844.555	1.07102	0.000963779	0.0288452	-	6	12604824	12606640	+	1294	-	- && Q0J998.1 RecName: Full=Indole-3-acetate O-methyltransferase 1; AltName: Full=IAA carboxylmethyltransferase 1; AltName: Full=OsSABATH4; AltName: Full=S-adenosyl-L-methionine:(indol-3-yl) acetate carboxylmethyltransferase 1 && PF03492:SAM dependent carboxyl methyltransferase	-
Os01g0854000	961.822	916.931	2063.45	552.023	828.359	385.41	1314.07	588.597	1.15781	0.000969136	0.0289337	-	1	36794890	36796983	+	2094	-	- && Q9SND9.1 RecName: Full=Uncharacterized acetyltransferase At3g50280 && PF02458:Transferase family	-
Os01g0847100	59.2834	59.8193	80.0613	23.616	30.6466	34.4501	66.388	29.5709	1.16668	0.000979936	0.0291075	-	1	36392080	36392685	+	606	-	- && - && -	-
novel.301	0	0.892825	1.06748	0.983998	48.674	12.9188	0.653436	20.8589	-4.99314	0.000981128	0.0291075	-	11	26979984	26981336	-	1353	-	-	-
Os01g0210400	0	0	1.06748	18.696	7.21096	7.53596	0.355828	11.1476	-4.97214	0.000987052	0.0291084	-	1	6005040	6007163	-	1500	-	- && - && PF04765:Protein of unknown function (DUF616)	-
novel.291	86.8809	101.782	222.037	22.632	75.7151	27.9907	136.9	42.1126	1.69405	0.000990434	0.0291725	-	11	18435374	18438210	-	1641	-	PF08263:Leucine rich repeat N-terminal domain	LRRNT_2
Os08g0190100	8.17702	8.03542	30.957	0.983998	1.80274	0	15.7232	0.928913	4.02232	0.000997009	0.0292781	GLP8-11	8	5264245	5265340	+	934	-	- && Q6YZY5.1 RecName: Full=Germin-like protein 8-11; Flags: Precursor && PF00190:Cupin	-
Os04g0116600	6.13277	4.46412	17.0797	234.192	125.29	12.9188	9.22554	124.134	-3.75606	0.00100341	0.0292854	-	4	984543	987069	+	1811	-	- && Q8L9C4.1 RecName: Full=Very-long-chain 3-oxoacyl-CoA reductase 1; AltName: Full=Beta-ketoacyl reductase 1; Short=AtKCR1; AltName: Full=Protein GLOSSY 8; Short=gl8At && PF00106:short chain dehydrogenase	adh_short
Os01g0974701	26.5753	24.9991	21.3497	50.1839	48.674	77.5127	24.308	58.7902	-1.26897	0.00108979	0.0312494	-	1	43071516	43072507	+	634	-	- && Q9SVM8.1 RecName: Full=Glycine-rich RNA-binding protein 2, mitochondrial; Short=AtGR-RBP2; AltName: Full=AtRBG2; AltName: Full=Glycine-rich protein 2; Short=AtGRP2; AltName: Full=Mitochondrial RNA-binding protein 1a; Short=At-mRBP1a; Flags: Precursor && PF00076:RNA recognition motif. (a.k.a. RRM, RBD, or RNP domain)	RRM_1
Os12g0160100	58.2613	61.6049	70.4539	27.552	35.1534	21.5313	63.44	28.0789	1.16803	0.00109074	0.0312494	-	12	2996185	2996805	+	621	-	- && - && -	-
Os01g0733500	298.461	424.092	765.386	1619.66	1238.48	633.02	495.98	1163.72	-1.23099	0.00109977	0.0314707	RD22	1	30589859	30592513	+	1617	-	- && Q942D4.1 RecName: Full=BURP domain-containing protein 3; Short=OsBURP03; Flags: Precursor && PF03181:BURP domain	-
Os06g0631800	0	2.67847	0	18.696	7.21096	19.3782	0.892825	15.095	-3.97821	0.00113196	0.0321115	-	6	25583151	25585088	+	1662	-	- && - && -	-
Os10g0154700	58.2613	81.2471	154.785	34.4399	46.8712	16.1485	98.0978	32.4865	1.58617	0.00113489	0.0321115	OsCYP18-4	10	3438474	3439397	+	924	-	- && Q39613.1 RecName: Full=Peptidyl-prolyl cis-trans isomerase; Short=PPIase; AltName: Full=Cyclophilin; AltName: Full=Cyclosporin A-binding protein; AltName: Full=Rotamase && PF00160:Cyclophilin type peptidyl-prolyl cis-trans isomerase/CLD	Pro_isomerase
Os01g0949750	202.381	203.564	258.331	95.4478	155.937	61.3642	221.426	104.25	1.08188	0.0011779	0.0327733	OsGSTU35	1	41841787	41842619	+	727	-	- && Q03662.1 RecName: Full=Probable glutathione S-transferase; AltName: Full=Auxin-induced protein PGNT1/PCNT110 && PF00043:Glutathione S-transferase, C-terminal domain|PF13417:Glutathione S-transferase, N-terminal domain	GST_C
Os11g0427700	38.8409	25.8919	43.7668	2.95199	16.2247	3.2297	36.1665	7.46878	2.2499	0.00120269	0.0331202	-	11	13661556	13663478	+	1923	-	- && Q84MA8.1 RecName: Full=Adenine/guanine permease AZG2; AltName: Full=AzgA-homolog protein; AltName: Full=Protein AZAGUANINE RESISTANT 2; Short=AtAzg2 && PF00860:Permease family	-
Os06g0536333	8.17702	8.03542	6.4049	34.4399	25.2384	21.5313	7.53912	27.0699	-1.84199	0.00120374	0.0331202	-	6	20093428	20094565	+	540	-	- && Q8EYT0.1 RecName: Full=Macro domain-containing protein LA_4133 && PF01661:Macro domain	A1pp
Os01g0389200	27.5975	12.4995	23.4846	2.95199	6.30959	2.15313	21.1939	3.8049	2.45076	0.00123277	0.0335645	-	1	16415043	16416009	+	967	-	- && - && PF05078:Protein of unknown function (DUF679)	-
Os07g0686800	69.5047	58.0336	70.4539	18.696	38.7589	25.8376	65.9974	27.7641	1.24189	0.00124131	0.0336074	OsRLCK241	7	29179661	29181491	+	1396	-	- && O49839.1 RecName: Full=Protein kinase 2A, chloroplastic; Flags: Precursor && PF07714:Protein tyrosine kinase	Pkinase_Tyr
Os11g0572200	36.7966	59.8193	70.4539	18.696	25.2384	21.5313	55.6899	21.8219	1.3492	0.00126718	0.0340891	OsEXO70FX8	11	21462382	21464486	-	2041	-	- && - && -	-
novel.8	33.7302	46.4269	7.47239	81.6719	63.0959	185.169	29.2098	109.979	-1.90409	0.00128848	0.0345356	-	1	10997274	10999301	+	1334	-	PF01095:Pectinesterase	-
Os09g0107900	53.1506	63.3906	32.0245	116.112	90.137	104.427	49.5219	103.559	-1.05748	0.00130733	0.034928	-	9	751720	755193	+	1693	-	- && - && -	-
Os06g0299100	32.7081	24.9991	33.092	101.352	73.0109	46.2923	30.2664	73.5517	-1.28654	0.00131251	0.035024	-	6	11116720	11118276	-	1344	-	- && Q8L9C4.1 RecName: Full=Very-long-chain 3-oxoacyl-CoA reductase 1; AltName: Full=Beta-ketoacyl reductase 1; Short=AtKCR1; AltName: Full=Protein GLOSSY 8; Short=gl8At && PF00106:short chain dehydrogenase	adh_short
Os03g0142500	60.3055	38.3915	61.9141	15.744	27.9425	8.61252	53.537	17.433	1.60298	0.00131909	0.0350831	OsRFPH2-9	3	2336789	2341656	+	2682	-	- && Q61703.1 RecName: Full=Inter-alpha-trypsin inhibitor heavy chain H2; Short=ITI heavy chain H2; Short=ITI-HC2; Short=Inter-alpha-inhibitor heavy chain 2; Flags: Precursor && PF00092:von Willebrand factor type A domain|PF17123:RING-like zinc finger|PF14624:VWA / Hh protein intein-like	VWA
Os04g0322100	26.5753	44.6412	29.8895	3.93599	15.3233	5.38283	33.702	8.21403	2.02129	0.00134589	0.0355896	-	4	14863727	14864824	-	1098	-	- && Q9M0X5.1 RecName: Full=Cysteine-rich receptor-like protein kinase 25; Short=Cysteine-rich RLK25; Flags: Precursor && PF01657:Salt stress response/antifungal	-
Os03g0233000	38.8409	33.9273	24.5521	10.824	12.6192	5.38283	32.4401	9.60866	1.74368	0.00136847	0.0359604	-	3	7061772	7063303	+	1428	-	- && Q9LVR5.1 RecName: Full=Calcium uniporter protein 3, mitochondrial; Flags: Precursor && PF04678:Mitochondrial calcium uniporter	-
novel.739	225.89	275.883	390.699	114.144	155.937	23.6844	297.491	97.9217	1.59975	0.00137398	0.0360534	-	5	8086726	8088842	+	1360	-	PF03106:WRKY DNA -binding domain	WRKY
Os03g0642900	62.3498	68.7475	60.8466	30.5039	35.1534	24.761	63.9813	30.1395	1.08196	0.00140178	0.0364974	-	3	24768026	24782984	-	1110	-	- && O74545.1 RecName: Full=Putative hydrolase C777.06c && PF12706:Beta-lactamase superfamily domain	-
Os02g0155700	39.863	45.5341	60.8466	24.6	18.0274	12.9188	48.7479	18.5154	1.39081	0.00142352	0.0368846	-	2	3059566	3061394	-	1829	-	- && Q9C7S5.1 RecName: Full=Tyrosine-sulfated glycopeptide receptor 1; AltName: Full=PSY1 receptor && PF13855:Leucine rich repeat|PF12799:Leucine Rich repeats (2 copies)|PF08263:Leucine rich repeat N-terminal domain	LRRNT_2
Os05g0233000	79.726	114.282	157.988	67.8959	50.4767	29.0673	117.332	49.1466	1.2514	0.00144303	0.03727	-	5	8080835	8082069	+	1235	-	- && - && -	-
Os11g0567800	38.8409	46.4269	66.184	19.68	23.4356	16.1485	50.4839	19.7547	1.34615	0.00145042	0.0373409	-	11	21156776	21159062	+	2213	-	- && - && PF13855:Leucine rich repeat	-
Os03g0269700	14.3098	14.2852	23.4846	88.5598	54.0822	25.8376	17.3599	56.1599	-1.70067	0.00152557	0.0388844	-	3	8983003	8984178	+	1009	-	- && - && PF04646:Protein of unknown function, DUF604	-
novel.314	70.5268	70.5332	83.2637	42.3119	6.30959	17.225	74.7746	21.9489	1.77167	0.00158193	0.0398341	-	12	6583324	6584353	+	1030	-	PF08263:Leucine rich repeat N-terminal domain	LRRNT_2
Os03g0781300	84.8366	75.8901	76.8588	51.1679	33.3507	27.9907	79.1952	37.5031	1.07617	0.00158194	0.0398341	-	3	32393527	32394430	-	547	-	- && - && -	-
Os07g0162450	21.4647	33.9273	38.4294	8.85598	10.8164	9.68909	31.2738	9.78717	1.67403	0.0015876	0.0399221	-	7	3339394	3340629	+	1236	-	- && - && -	-
Os11g0116600	144.12	175.887	296.761	69.8639	135.205	65.6705	205.589	90.2466	1.18351	0.001601	0.0401882	OsWRKY52	11	750013	750897	-	534	-	- && - && -	-
Os01g0879200	116.523	116.067	199.619	64.9439	87.4329	37.6798	144.07	63.3522	1.17888	0.00162536	0.0405885	DRR206	1	38148684	38149534	+	851	-	- && - && PF03018:Dirigent-like protein	-
novel.332	17.3762	15.178	5.33742	0.983998	0.90137	1.07657	12.6305	0.987311	3.68625	0.00164267	0.040936	-	12	15989565	15990592	+	1028	-	-	-
novel.548	14.3098	8.92825	14.9448	0.983998	0.90137	2.15313	12.7276	1.34617	3.26387	0.00166357	0.0412863	-	3	30083330	30084937	+	1608	-	-	-
Os08g0189600	62.3498	49.1054	113.153	19.68	37.8575	26.9141	74.8695	28.1505	1.4043	0.00167333	0.0413763	GLP8-7	8	5242497	5243656	+	982	-	- && Q6YZZ2.1 RecName: Full=Germin-like protein 8-7; AltName: Full=Germin-like protein 6; Short=OsGER6; Flags: Precursor && PF00190:Cupin	-
Os04g0611700	0	0.892825	0	25.584	12.6192	1.07657	0.297608	13.0932	-5.20715	0.00167406	0.0413763	OsKS3	4	31019367	31024094	+	2220	-	- && Q0JA83.2 RecName: Full=Ent-kaurene synthase-like 3; Short=OsKS3; Short=OsKSL3; AltName: Full=Ent-kaurene synthase-like 2; Short=OsKS2 && PF03936:Terpene synthase family, metal binding domain|PF01397:Terpene synthase, N-terminal domain	-
Os02g0121700	1070.17	809.792	952.196	384.743	679.633	174.404	944.052	412.927	1.1917	0.00167903	0.0414569	OsTPS3	2	1145837	1151052	+	2037	-	- && Q6ZH94.1 RecName: Full=S-(+)-linalool synthase, chloroplastic; Short=OsLIS; Flags: Precursor && PF03936:Terpene synthase family, metal binding domain|PF01397:Terpene synthase, N-terminal domain	-
Os11g0226201	22.4868	31.2489	30.957	13.776	136.107	237.921	28.2309	129.268	-2.19376	0.00168603	0.0414835	-	11	6599802	6601409	+	1071	-	- && Q9LDQ3.3 RecName: Full=Putative cysteine-rich receptor-like protein kinase 35; Short=Cysteine-rich RLK35; Flags: Precursor && PF00069:Protein kinase domain	Pkinase
Os12g0226400	49.0621	71.426	28.8221	65.9279	449.783	367.109	49.7701	294.273	-2.56239	0.00168691	0.0414835	-	12	6889996	6896735	+	1166	-	- && Q9SLN8.1 RecName: Full=2-alkenal reductase (NADP(+)-dependent); AltName: Full=Alkenal double bound reductase; AltName: Full=Allylic alcohol dehydrogenase 1; Short=allyl-ADH1; AltName: Full=Flavin-free double bond reductase; Short=NtDBR; AltName: Full=Pulegone reductase; Short=NtRed-1 && PF00107:Zinc-binding dehydrogenase|PF16884:N-terminal domain of oxidoreductase	ADH_zinc_N
Os02g0738200	94.0358	80.3542	127.031	26.568	65.8	26.9141	100.474	39.7607	1.32847	0.00168699	0.0414835	OsPUB40	2	30805988	30807610	-	1623	-	- && Q5PNY6.1 RecName: Full=U-box domain-containing protein 21; AltName: Full=Plant U-box protein 21 && PF04564:U-box domain	U-box
Os01g0925100	215.669	207.135	178.27	111.192	128.896	50.5986	200.358	96.8954	1.04411	0.00174077	0.0425457	-	1	40559547	40561419	-	1837	-	- && - && -	-
Os01g0944900	64.3941	59.8193	65.1165	29.5199	36.0548	23.6844	63.1099	29.7531	1.07781	0.00175328	0.0427317	Gns2	1	41539758	41540817	-	1060	-	- && Q02438.2 RecName: Full=Glucan endo-1,3-beta-glucosidase GV; AltName: Full=(1->3)-beta-glucan endohydrolase GV; AltName: Full=(1->3)-beta-glucanase isoenzyme GV; AltName: Full=Beta-1,3-endoglucanase GV && PF00332:Glycosyl hydrolases family 17	Glyco_hydro_17
Os03g0226300	107.323	85.7112	107.816	203.688	122.586	284.213	100.283	203.496	-1.02005	0.00175424	0.0427317	OsRLCK104	3	6626961	6630244	+	1882	-	- && P93749.1 RecName: Full=Probable protein kinase At2g41970 && PF07714:Protein tyrosine kinase	Pkinase_Tyr
Os12g0631600	217.713	199.993	220.969	109.224	148.726	58.1345	212.892	105.361	1.01007	0.00180158	0.0437217	-	12	27046194	27049741	+	1956	-	- && - && -	-
Os01g0777900	86.8809	67.8547	68.319	46.2479	29.7452	30.1438	74.3515	35.379	1.07085	0.00184361	0.0445178	-	1	32934209	32934997	+	584	-	- && - && -	-
Os06g0590800	0	0	3.20245	23.616	25.2384	3.2297	1.06748	17.3613	-4.0895	0.00189085	0.0451614	-	6	23204548	23206070	-	1523	-	- && Q9ZQG4.1 RecName: Full=UDP-glycosyltransferase 73B5; AltName: Full=Flavonol 3-O-glucosyltransferase UGT73B5 && PF00201:UDP-glucoronosyl and UDP-glucosyl transferase	UDPGT
Os04g0557800	63.3719	43.7484	28.8221	98.3998	72.1096	158.255	45.3141	109.588	-1.27042	0.00192844	0.0458969	Pl	4	27949384	27955640	-	2497	-	- && P13526.1 RecName: Full=Anthocyanin regulatory Lc protein && PF14215:bHLH-MYC and R2R3-MYB transcription factors N-terminal|PF00010:Helix-loop-helix DNA-binding domain	HLH
novel.1123	476.312	349.095	199.619	661.247	486.74	934.459	341.675	694.148	-1.02173	0.00193126	0.0458969	-	9	7015973	7017219	+	1247	-	-	-
Os03g0101200	17.3762	15.178	9.60736	32.4719	36.9562	46.2923	14.0539	38.5735	-1.45003	0.00194782	0.0461112	OsPUB50	3	110522	114247	-	2298	-	- && Q9FKG6.1 RecName: Full=U-box domain-containing protein 52; AltName: Full=Plant U-box protein 52; Includes: RecName: Full=E3 ubiquitin ligase; Includes: RecName: Full=Serine/threonine-protein kinase && PF00069:Protein kinase domain|PF04564:U-box domain	Pkinase
Os01g0694000	40.8851	56.248	55.5092	21.648	20.7315	24.761	50.8807	22.3802	1.18875	0.00197767	0.046557	-	1	28666309	28668105	+	1701	-	- && Q1MX30.1 RecName: Full=Receptor kinase-like protein Xa21; Contains: RecName: Full=Receptor kinase-like protein Xa21, processed; Flags: Precursor && PF13855:Leucine rich repeat|PF07714:Protein tyrosine kinase	Pkinase_Tyr
Os11g0185800	21.4647	23.2134	25.6196	52.1519	71.2082	40.9095	23.4326	54.7565	-1.22952	0.00200899	0.0470056	-	11	4351277	4353991	-	825	-	- && - && -	-
Os02g0104100	37.8187	33.9273	23.4846	54.1199	74.8137	76.4361	31.7436	68.4566	-1.10542	0.00206257	0.0478877	-	2	199223	204482	+	814	-	- && O64645.1 RecName: Full=MADS-box protein SOC1; AltName: Full=Agamous-like MADS-box protein AGL20; AltName: Full=Protein SUPPRESSOR OF CONSTANS OVEREXPRESSION 1 && PF00319:SRF-type transcription factor (DNA-binding and dimerisation domain)|PF01486:K-box region	SRF-TF
Os01g0498300	52.1285	47.3197	72.5889	25.584	29.7452	19.3782	57.3457	24.9024	1.19462	0.00218316	0.0498716	-	1	17159733	17161535	-	1803	-	- && Q5NDL3.2 RecName: Full=EGF domain-specific O-linked N-acetylglucosamine transferase; AltName: Full=Extracellular O-linked N-acetylglucosamine transferase; Flags: Precursor && PF04577:Protein of unknown function (DUF563)	-

## Sheet: Table S5
Table S5 The gene ontology (GO) enrichment analyses of up-regulated DEGs in irClpP6-4_Con vs WT_Con comparison.
Category	Description	GeneRatio	pvalue	Count
Biological processes	protein ubiquitination	4/82	0.00543313	4
Biological processes	protein modification by small protein conjugation	4/82	0.00575704	4
Biological processes	regulation of response to stimulus	2/82	0.00965832	2
Biological processes	response to external stimulus	2/82	0.0111833	2
Biological processes	response to biotic stimulus	2/82	0.0111833	2
Biological processes	cellular biogenic amine metabolic process	2/82	0.0128068	2
Biological processes	cellular amine metabolic process	2/82	0.0128068	2
Biological processes	protein modification by small protein conjugation or removal	4/82	0.0191712	4
Biological processes	defense response	2/82	0.0339445	2
Biological processes	cellular potassium ion transport	2/82	0.0339445	2
Biological processes	potassium ion transmembrane transport	2/82	0.0339445	2
Biological processes	potassium ion transport	2/82	0.0391265	2
Biological processes	aromatic amino acid family metabolic process	2/82	0.0418232	2
Biological processes	amine metabolic process	2/82	0.0418232	2
Biological processes	cell wall modification	2/82	0.0418232	2
Cellular components	cell periphery	0.25	0.00305842	4
Cellular components	exocyst	0.125	0.0133595	2
Cellular components	cell cortex	0.125	0.0133595	2
Cellular components	cell cortex part	0.125	0.0133595	2
Cellular components	cytoplasmic region	0.125	0.0133595	2
Cellular components	tethering complex	0.125	0.0153329	2
Cellular components	cell wall	0.125	0.0380669	2
Cellular components	external encapsulating structure	0.125	0.0380669	2
Molecular functions	transferase activity, transferring acyl groups other than amino-acyl groups	13/130	2.20106e-07	13
Molecular functions	transferase activity, transferring acyl groups	13/130	1.74645e-06	13
Molecular functions	carbohydrate binding	9/130	0.000244978	9
Molecular functions	sequence-specific DNA binding	9/130	0.00119066	9
Molecular functions	lyase activity	6/130	0.00623087	6
Molecular functions	carboxy-lyase activity	3/130	0.00813928	3
Molecular functions	pattern binding	4/130	0.00908665	4
Molecular functions	polysaccharide binding	4/130	0.00908665	4
Molecular functions	ubiquitin-protein transferase activity	4/130	0.0105237	4
Molecular functions	ubiquitin-like protein transferase activity	4/130	0.0105237	4
Molecular functions	carbon-carbon lyase activity	3/130	0.0249731	3
Molecular functions	DNA binding transcription factor activity	9/130	0.0294604	9
Molecular functions	potassium ion transmembrane transporter activity	2/130	0.0351979	2
Molecular functions	ADP binding	7/130	0.0360744	7
Molecular functions	pectinesterase activity	2/130	0.043342	2
Molecular functions	transcription regulator activity	9/130	0.043962	9
Molecular functions	carbon-oxygen lyase activity	3/130	0.045354	3
Molecular functions	pyridoxal phosphate binding	3/130	0.045354	3
Molecular functions	vitamin B6 binding	3/130	0.045354	3

## Sheet: Table S6
Table S6 The gene ontology (GO) enrichment analyses of down-regulated DEGs in irClpP6-4_Con vs WT_Con comparison.
Category	Description	GeneRatio	pvalue	Count
Biological processes	response to oxidative stress	4/47	0.00605032	4
Biological processes	response to stress	5/47	0.0301472	5
Biological processes	transmembrane transport	7/47	0.0403147	7
Molecular functions	sulfotransferase activity	2/74	0.00793195	2
Molecular functions	transferase activity, transferring sulfur-containing groups	2/74	0.00793195	2
Molecular functions	peroxidase activity	4/74	0.00904607	4
Molecular functions	oxidoreductase activity, acting on peroxide as acceptor	4/74	0.00983942	4
Molecular functions	antioxidant activity	4/74	0.011559	4
Molecular functions	heme binding	7/74	0.0154844	7
Molecular functions	tetrapyrrole binding	7/74	0.0158878	7
Molecular functions	terpene synthase activity	2/74	0.0173868	2
Molecular functions	carbon-oxygen lyase activity, acting on phosphates	2/74	0.0196537	2
Molecular functions	serine-type carboxypeptidase activity	2/74	0.034119	2
Molecular functions	carboxypeptidase activity	2/74	0.03559	2
Molecular functions	serine-type exopeptidase activity	2/74	0.0401469	2
